# Supplementary material for: An efficient organocatalytic enantioselective Michael addition of aryl methyl ketones with 2-furanones: highly functionalized chiral 3,4-substituted lactones
Source: Royal Society of Chemistry journal article supplement (doi:10.1039/c2cc35488h), 2012-12-19

## *Supporting Information*

# **An Efficient Organocatalytic Enantioselective Michael Addition of Aryl-ketones with 2-Furanone: Highly Functionalized Chiral 3,4-Substituted Lactones**

**Wei Wang, Junfeng Wang, Shuo Zhou, Qi Sun, Zemei Ge, Xin Wang,\* and Runtao Li\***

*State Key Laboratory of Natural and Biomimetic Drugs, School of Pharmaceutical Sciences, Peking University, Beijing 100191, China*

## **Content**

|                                                                                             |    |
|---------------------------------------------------------------------------------------------|----|
| General Information -----                                                                   | 0  |
| Synthesis of ethyl 5,5-disubstituted-2-oxo-2,5-dihydrofuran-3-carboxylate <b>1a-c</b> ----- | 2  |
| General procedure for the organocatalytic Michael reactions -----                           | 3  |
| Scope of the Michael addition reaction-----                                                 | 3  |
| NMR Spectra for Michael Products <b>3a-3v</b> -----                                         | 13 |
| HPLC analysis for compounds <b>3a-3v</b> -----                                              | 35 |
| Crystal information of <b>3d</b> -----                                                      | 79 |
| ESI-MS of intermediate enamine salt of <b>3a</b> -----                                      | 86 |

## General Information

Unless otherwise stated, all reagents were purchased from commercial suppliers and were used without further purification. Ethyl 5,5-disubstituted-2-oxo-2,5-dihydrofuran-3-carboxylate **1a-c** was not commercially available and was prepared in our lab. Reactions were monitored by thin layer chromatography (TLC) on GF<sub>254</sub> silica gel plates. <sup>1</sup>H NMR spectra and <sup>13</sup>C NMR spectra were recorded on a Bruker AVANCE III 400 (400 MHz) spectrometer in needful D-reagents with tetramethylsilane (TMS) as an internal reference. Data for <sup>1</sup>H NMR were reported as follows: chemical shift (ppm), and multiplicity (s = singlet, d = doublet, t = triplet, dd = double of doublet, br = broad, m = multiplet), coupling constants (Hz) and integration; Data for <sup>13</sup>C NMR were reported as ppm. Melting points were measured on an X<sub>4</sub>-type micro-melting point apparatus and were uncorrected. HPLC analyses were performed using a Daicel ChiralPak AS or AD column purchased. Crystal structure determination of Michael product **3d** was carried out on a Rigaku MicroMax 002+ diffractometer. Optical rotations were measured on a AA-10R automatic polarimeter and were reported as follows:  $[\alpha]_{\text{D}}^{25}$  (*c* in g per 100 mL of solvent). HRMS of Michael products were carried out Bruker Apex IV FTMS.

### Synthesis of ethyl 5,5-disubstituted-2-oxo-2,5-dihydrofuran-3-carboxylate **1a-c**

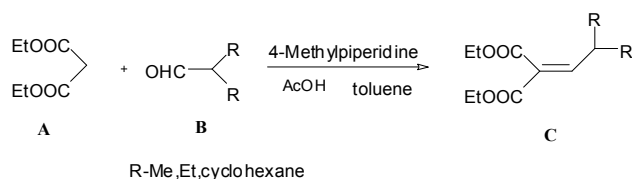

To the solution of diethylmalonate **A** (50mmol) in toluene (20mL) was added 4-methylpiperidine (8mmol) and acetic acid (40mmol). While the mixture was heated to reflux with a water segregator, Aldehyde **B** (60mmol) was added in 12 batches within 2 hours. After extra 4 hours of reflux, the mixture was cooled down and then diluted with mL ethyl acetate (80mL). The solution was washed with 10% (w/w) NaHCO<sub>3</sub> solution (80mL) and saturated NaCl solution (80mL) successively, dried over anhydrous MgSO<sub>4</sub> and concentrated in vacuo. The residue was purified by silica gel chromatography to afford **C** (yield 78%-94%) as colorless oil.

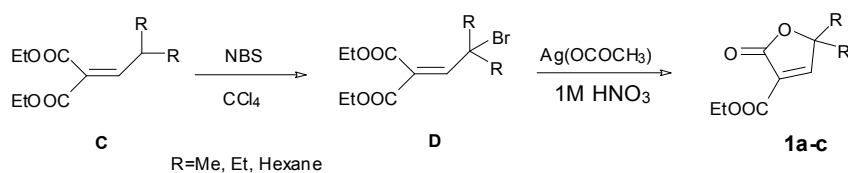

To the solution of **C** (39mmol) in CCl<sub>4</sub> (100 mL) was added NBS (47 mmol) and benzoyl peroxide (20mg). After 4 hours' reflux, the reaction mixture was cooled down and concentrated on a rotary evaporator. The residue was diluted with mL mixed solvent (petroleum ether: ethyl acetate = 10:1, 55mL) and the suspension was filtered. The filtrate was concentrated in vacuo to give crude product **D** which was used in the next step directly. Crude product **D** and Ag(OCOCH<sub>3</sub>) (47mmol) were stirred in 1M dilute HNO<sub>3</sub> (100 mL) away from light under room temperature for 24 hours. Then the PH of the suspension was adjusted to 7 or 8 with 10% (w/w) NaHCO<sub>3</sub> solution. The reaction mixture was diluted with ethyl acetate (100 mL) and the suspension was filtered.. The filtrate was dried over anhydrous MgSO<sub>4</sub> and concentrated in vacuo. The crude product was purified by silica gel chromatography to afford **1a-c** (21%-62% for 2 steps) as white solid or colorless oil

## General procedure for the organocatalytic Michael reactions

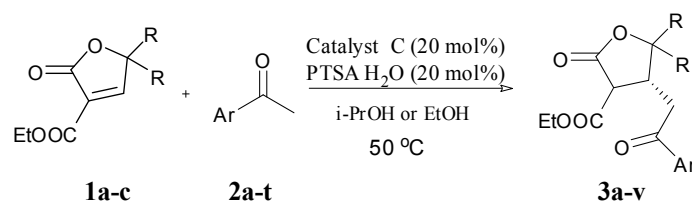

The mixture of furanone (0.5mmol), arylacetone (0.6mmol), chiral catalyst (*1S,2S*)-(-)-1,2-diphenyl-1,2-ethanediamine (0.1mmol) and *p*-toluenesulfonic acid monohydrate (0.1mmol) in solvent (1mL) was stirred under 50°C or 70°C for 7 days and then directly purified by silica gel chromatography to provide the products as solid or clear oil.

## Scope of the Michael addition reaction

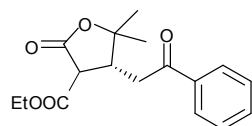

### **(3S,4R)-ethyl 5,5-dimethyl-2-oxo-4-(2-oxo-2-phenylethyl)tetrahydrofuran-3-carboxylate 3a:**

Obtained in 82% yield, colorless oil; <sup>1</sup>H NMR (400 MHz, CDCl<sub>3</sub>) δ 7.91-7.96 (m, 2H), δ 7.61 (t, *J*=7.2 Hz, 1H) δ 7.50 (t, *J*=7.6 Hz, 2H), δ 4.26 (q, *J* = 7.2 Hz, 2H), δ 3.48 (d, *J* = 11.2 Hz, 1H), δ 3.30-3.38 (m, 1H), δ 3.09-3.26 (m, 2H), δ 1.55 (s, 3H), δ 1.37 (s, 3H), δ 1.29 (t, *J* = 7.2 Hz, 3H); <sup>13</sup>C NMR (100 MHz, CDCl<sub>3</sub>): δ 196.9, 170.4, 167.7, 136.1, 133.7, 128.9, 128.1, 85.5, 62.1, 53.4, 45.1, 38.2, 27.4, 23.1, 14.0. HPLC (AS, hexane:*i*-PrOH 70:30, 1.0 mL/min): *t*<sub>R</sub> 20.29 min (major enantiomer), *t*<sub>R</sub> 50.80 min (minor enantiomer); ee 97%; [α]<sub>D</sub><sup>25</sup> = +9.5 (*c* = 2.1, CHCl<sub>3</sub>); ES-HRMS: Calcd for C<sub>17</sub>H<sub>21</sub>O<sub>5</sub>[M+H]<sup>+</sup>, 305.13835, Found 305.13875.

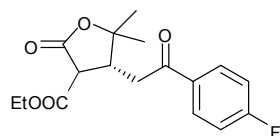

### **(3S,4R)-ethyl 4-(2-(4-fluorophenyl)-2-oxoethyl)-5,5-dimethyl-2-oxotetrahydrofuran-3-**

**carboxylate 3b:** Obtained in 62% yield, white solid; m.p. 60.2-62.8°C; <sup>1</sup>H NMR (400 MHz, CDCl<sub>3</sub>): δ 7.94-8.02 (m, 2H), δ 7.17 (m, *J*=8.4 Hz, 2H), δ 4.28 (q, *J* = 7.2 Hz, 2H), δ 3.47 (d, *J* = 11.6 Hz, 1H), δ 3.29-3.38 (m, 1H), δ 3.06-3.23 (m, 2H), δ 1.56 (s, 3H), δ 1.37 (s, 3H), δ 1.30 (t, *J* = 7.2 Hz, 3H); <sup>13</sup>C NMR (100 MHz, CDCl<sub>3</sub>): δ 195.3, 170.3, 167.7, 166.1 (d, 254.4 Hz), 132.5 (d,

3.1 Hz), 130.8 (d, 9.4 Hz), 116.0 (d, 21.8Hz), 85.4, 62.2, 53.3, 45.0, 38.1, 27.4, 23.1, 14.0. HPLC (AS, hexane:*i*-PrOH 70:30, 1.0 mL/min):  $t_R$  15.23 min (major enantiomer),  $t_R$  43.91 min (minor enantiomer); ee 97%;  $[\alpha]_D^{25} = +13.8$  ( $c = 1.2$ ,  $\text{CHCl}_3$ ). ES-HRMS: Calcd for  $\text{C}_{17}\text{H}_{20}\text{FO}_5[\text{M}+\text{H}]^+$ , 323.12893, Found 323.12951.

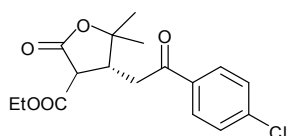

**(3S,4R)-ethyl 4-(2-(4-chlorophenyl)-2-oxoethyl)-5,5-dimethyl-2-oxotetrahydrofuran-3-carboxylate 3c:** Obtained in 90% yield, white solid; m.p. 73.1-74.5°C;  $^1\text{H}$  NMR (400 MHz,  $\text{CDCl}_3$ )  $\delta$  7.87-7.92 (m, 2H),  $\delta$  7.45-7.49 (m, 2H),  $\delta$  4.27 (q,  $J = 7.2$  Hz, 2H),  $\delta$  3.47 (d,  $J = 11.6$  Hz, 1H),  $\delta$  3.28-3.36 (m, 1H),  $\delta$  3.06-3.22 (m, 2H),  $\delta$  1.55 (s, 3H),  $\delta$  1.37 (s, 3H),  $\delta$  1.30 (t,  $J = 7.2$  Hz, 3H);  $^{13}\text{C}$  NMR (100 MHz,  $\text{CDCl}_3$ ):  $\delta$  195.7, 170.3, 167.6, 140.3, 134.4, 129.5, 129.2, 85.4, 62.2, 53.3, 45.0, 38.2, 27.4, 23.1, 14.0. HPLC (AS, hexane:*i*-PrOH 70:30, 1.0 mL/min):  $t_R$  19.38 min (major enantiomer),  $t_R$  54.57 min (minor enantiomer); ee 94%;  $[\alpha]_D^{25} = -16.8$  ( $c = 3.1$ ,  $\text{CHCl}_3$ ). ES-HRMS: Calcd for  $\text{C}_{17}\text{H}_{20}\text{ClO}_5[\text{M}+\text{H}]^+$ , 339.09938, Found 339.10012.

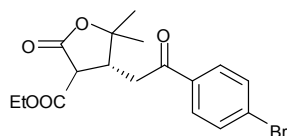

**(3S,4R)-ethyl 4-(2-(4-bromophenyl)-2-oxoethyl)-5,5-dimethyl-2-oxotetrahydrofuran-3-carboxylate 3d:** Obtained in 63% yield, white solid; m.p. 75.3-76.5°C;  $^1\text{H}$  NMR (400 MHz,  $\text{CDCl}_3$ )  $\delta$  7.78-7.84 (m, 2H),  $\delta$  7.64 (d,  $J = 8.4$  Hz, 2H),  $\delta$  4.27 (q,  $J = 7.2$  Hz, 2H),  $\delta$  3.46 (d,  $J = 11.6$  Hz, 1H),  $\delta$  3.27-3.35 (m, 1H),  $\delta$  3.05-3.21 (m, 2H),  $\delta$  1.55 (s, 3H),  $\delta$  1.36 (s, 3H),  $\delta$  1.30 (t,  $J = 7.2$  Hz, 3H);  $^{13}\text{C}$  NMR (100 MHz,  $\text{CDCl}_3$ ):  $\delta$  201.0, 175.2, 172.6, 139.8, 137.2, 134.6, 134.0, 90.4, 67.2, 58.3, 50.0, 43.2, 32.4, 28.1, 19.0. HPLC (AS, hexane:*i*-PrOH 70:30, 1.0 mL/min):  $t_R$  16.71 min. (major enantiomer),  $t_R$  45.64 min (minor enantiomer); ee 97%;  $[\alpha]_D^{25} = -7.1$  ( $c = 2.6$ ,  $\text{CHCl}_3$ ). ES-HRMS: Calcd for  $\text{C}_{17}\text{H}_{20}\text{BrO}_5[\text{M}+\text{H}]^+$ , 383.04886, Found 383.04968.

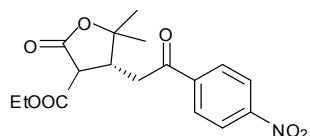

**(3S,4R)-ethyl 5,5-dimethyl-4-(2-(4-nitrophenyl)-2-oxoethyl)-2-oxotetrahydrofuran-3-carboxylate 3e:** Obtained in 56% yield, yellow solid; m.p. 137.9-138.6 °C;  $^1\text{H}$  NMR (400 MHz,  $\text{CDCl}_3$ )  $\delta$  8.33 (d,  $J = 8.4$  Hz, 2H),  $\delta$  8.12 (d,  $J = 8.4$  Hz, 2H),  $\delta$  4.27 (q,  $J = 7.2$  Hz, 2H),  $\delta$  3.48 (d,  $J = 11.2$  Hz, 1H),  $\delta$  3.15-3.36 (m, 3H),  $\delta$  1.56 (s, 3H),  $\delta$  1.38 (s, 3H),  $\delta$  1.29 (t,  $J = 7.2$  Hz, 3H);  $^{13}\text{C}$  NMR (100 MHz,  $\text{CDCl}_3$ ): 195.6, 170.2, 167.7, 150.6, 140.4, 129.2, 124.1, 85.3, 62.2, 53.2, 44.8, 38.8, 27.4, 23.1, 14.0; HPLC (AS, hexane:*i*-PrOH 70:30, 1.0 mL/min):  $t_{\text{R}}$  31.33 min (major enantiomer),  $t_{\text{R}}$  66.11 min (minor enantiomer); ee >99%;  $[\alpha]_{\text{D}}^{25} = -13.3$  ( $c = 3.0$ ,  $\text{CHCl}_3$ ). ES-HRMS: Calcd for  $\text{C}_{17}\text{H}_{20}\text{NO}_7[\text{M}+\text{H}]^+$ , 350.12343, Found 350.12399.

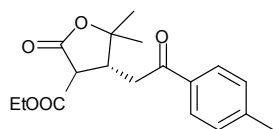

**(3S,4R)-ethyl 5,5-dimethyl-2-oxo-4-(2-oxo-2-p-tolyloethyl)tetrahydrofuran-3-carboxylate 3f:** Obtained in 89% yield white solid; m.p. 118.4-120.1 °C;  $^1\text{H}$  NMR (400 MHz,  $\text{CDCl}_3$ )  $\delta$  7.82-7.87 (m, 2H),  $\delta$  7.26-7.31 (m, 2H),  $\delta$  4.25 (q,  $J = 7.2$  Hz, 2H),  $\delta$  3.47 (d,  $J = 11.6$  Hz, 1H),  $\delta$  3.28-3.37 (m, 1H),  $\delta$  3.06-3.22 (m, 2H),  $\delta$  2.42 (s, 3H),  $\delta$  1.54 (s, 3H),  $\delta$  1.36 (s, 3H),  $\delta$  1.28 (t,  $J = 7.2$  Hz, 3H);  $^{13}\text{C}$  NMR (100 MHz,  $\text{CDCl}_3$ ):  $\delta$  196.5, 170.5, 167.7, 144.7, 133.6, 129.5, 128.2, 85.6, 62.1, 53.4, 45.2, 38.1, 27.4, 23.1, 21.7, 14.0; HPLC (AS, hexane:*i*-PrOH 70:30, 1.0 mL/min):  $t_{\text{R}}$  25.67 min (major enantiomer),  $t_{\text{R}}$  55.84 min (minor enantiomer); ee 82%;  $[\alpha]_{\text{D}}^{25} = -20.0$  ( $c = 1.0$ ,  $\text{CHCl}_3$ ). ES-HRMS: Calcd for  $\text{C}_{18}\text{H}_{23}\text{O}_5[\text{M}+\text{H}]^+$ , 319.15400, Found 319.15443.

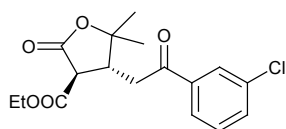

**(3S,4R)-ethyl 4-(2-(3-chlorophenyl)-2-oxoethyl)-5,5-dimethyl-2-oxotetrahydrofuran-3-carboxylate 3g:** Obtained in 69% yield, white solid; m.p. 116.4-117.8 °C;  $^1\text{H}$  NMR (400 MHz,  $\text{CDCl}_3$ )  $\delta$  7.90-7.93 (m, 1H),  $\delta$  7.81-7.86 (m, 1H),  $\delta$  7.58-7.62 (m, 1H),  $\delta$  7.46 (t,  $J = 8.0$  Hz, 1H),  $\delta$  4.29 (q,  $J = 7.2$  Hz, 2H),  $\delta$  3.47 (d,  $J = 11.6$  Hz, 1H),  $\delta$  3.30-3.38 (m, 1H),  $\delta$  3.07-3.23 (m, 2H),  $\delta$

1.57 (s, 3H),  $\delta$  1.38 (s, 3H),  $\delta$  1.32 (t,  $J = 7.2$  Hz, 3H);  $^{13}\text{C}$  NMR (100 MHz,  $\text{CDCl}_3$ ):  $\delta$  195.7, 170.3, 167.7, 137.6, 135.2, 133.6, 130.2, 128.2, 126.2, 85.4, 62.2, 53.3, 44.9, 38.3, 27.4, 23.1, 14.0; HPLC (AS, hexane:*i*-PrOH 70:30, 1.0 mL/min):  $t_{\text{R}}$  23.00 min (major enantiomer),  $t_{\text{R}}$  60.46 min (minor enantiomer); ee 82%;  $[\alpha]_{\text{D}}^{25} = -12.0$  ( $c = 3.0$ ,  $\text{CHCl}_3$ ). ES-HRMS: Calcd for  $\text{C}_{17}\text{H}_{20}\text{ClO}_5[\text{M}+\text{H}]^+$ , 339.09938, Found 339.10021.

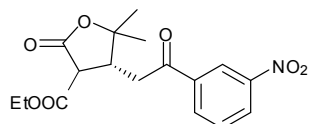

**(3S,4R)-ethyl 5,5-dimethyl-4-(2-(3-nitrophenyl)-2-oxoethyl)-2-oxotetrahydrofuran-3-carboxylate 3h:** Obtained in 74% yield, yellow solid; m.p. 105.1-106.5°C;  $^1\text{H}$  NMR (400 MHz,  $\text{CDCl}_3$ )  $\delta$  8.75 (s, 1H),  $\delta$  8.44-8.49 (m, 1H),  $\delta$  8.27-8.32 (m, 1H),  $\delta$  7.74 (t,  $J = 8.0$  Hz 1H),  $\delta$  4.29 (q,  $J = 7.2$  Hz, 2H),  $\delta$  3.50 (d,  $J = 11.6$  Hz, 1H),  $\delta$  3.15-3.39 (m, 3H),  $\delta$  1.58 (s, 3H),  $\delta$  1.40 (s, 3H),  $\delta$  1.31 (t,  $J = 7.2$  Hz, 3H);  $^{13}\text{C}$  NMR (100 MHz,  $\text{CDCl}_3$ ):  $\delta$  199.9, 175.1, 172.6, 153.5, 142.2, 138.7, 135.3, 132.9, 128.0, 90.2, 67.3, 58.2, 49.8, 43.5, 32.4, 28.2, 19.0; HPLC (AS, hexane:*i*-PrOH 70:30, 1.0 mL/min):  $t_{\text{R}}$  45.06 min (major enantiomer),  $t_{\text{R}}$  109.07 min (minor enantiomer); ee 92%;  $[\alpha]_{\text{D}}^{25} = -9.6$  ( $c = 2.5$ ,  $\text{CHCl}_3$ ). ES-HRMS: Calcd for  $\text{C}_{17}\text{H}_{20}\text{NO}_7[\text{M}+\text{H}]^+$ , 350.12343, Found 350.12398.

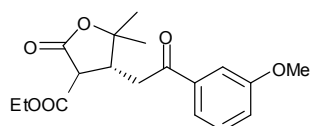

**(3S,4R)-ethyl 4-(2-(3-methoxyphenyl)-2-oxoethyl)-5,5-dimethyl-2-oxotetrahydrofuran-3-carboxylate 3i:** Obtained in 87% yield, white solid; m.p. 80.1-81.4°C;  $^1\text{H}$  NMR (400 MHz,  $\text{CDCl}_3$ )  $\delta$  7.51-7.55 (m, 1H),  $\delta$  7.46-7.50 (m, 1H),  $\delta$  7.41 (t,  $J = 8.0$  Hz 1H),  $\delta$  7.14-7.18 (m, 1H),  $\delta$  4.29 (q,  $J = 7.2$  Hz, 2H),  $\delta$  3.88 (s, 3H),  $\delta$  3.48 (d,  $J = 11.6$  Hz, 1H),  $\delta$  3.31-3.39 (m, 1H),  $\delta$  3.08-3.24 (m, 2H),  $\delta$  1.56 (s, 3H),  $\delta$  1.37 (s, 3H),  $\delta$  1.31 (t,  $J = 7.2$  Hz, 3H);  $^{13}\text{C}$  NMR (100 MHz,  $\text{CDCl}_3$ ):  $\delta$  196.7, 170.3, 167.6, 160.0, 137.4, 130.0, 120.6, 120.0, 112.6, 85.5, 62.1, 55.5, 53.3, 45.1, 38.4, 27.4, 23.1, 14.0; HPLC (AS, hexane:*i*-PrOH 70:30, 1.0 mL/min):  $t_{\text{R}}$  18.26 min (major enantiomer),  $t_{\text{R}}$  39.17 min (minor enantiomer); ee 92%;  $[\alpha]_{\text{D}}^{25} = -10.8$  ( $c = 2.6$ ,  $\text{CHCl}_3$ ).

ES-HRMS: Calcd for  $C_{18}H_{23}O_6[M+H]^+$ , 335.14891, Found 335.14936.

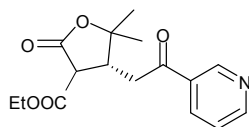

**(3S,4R)-ethyl 5,5-dimethyl-2-oxo-4-(2-oxo-2-(pyridin-3-yl)ethyl)tetrahydrofuran-3-**

**carboxylate 3j:** Obtained in 71% yield, yellow oil;  $^1H$  NMR (400 MHz,  $CDCl_3$ )  $\delta$  9.17 (d,  $J = 1.6$  Hz, 1H),  $\delta$  8.81-8.85 (m, 1H),  $\delta$  8.21-8.26 (m, 1H),  $\delta$  7.47 (dd,  $J_1 = 8.0$  Hz,  $J_2 = 4.8$  Hz, 1H),  $\delta$  4.29 (q,  $J = 7.2$  Hz, 2H),  $\delta$  3.49 (d,  $J = 11.6$  Hz, 1H),  $\delta$  3.31-3.38 (m, 1H),  $\delta$  3.09-3.29 (m, 2H),  $\delta$  1.58 (s, 3H),  $\delta$  1.38 (s, 3H),  $\delta$  1.31 (t,  $J = 7.2$  Hz, 3H);  $^{13}C$  NMR (100 MHz,  $CDCl_3$ ):  $\delta$  195.9, 170.2, 167.6, 154.1, 149.5, 135.5, 131.4, 123.9, 85.3, 62.2, 53.2, 44.8, 38.5, 27.4, 23.1, 14.0; HPLC (AS, hexane:*i*-PrOH 70:30, 1.0 mL/min):  $t_R$  18.59 min (major enantiomer),  $t_R$  41.32 min (minor enantiomer); ee 94%;  $[\alpha]_D^{25} = -11.4$  ( $c = 2.8$ ,  $CHCl_3$ ). ES-HRMS: Calcd for  $C_{16}H_{20}NO_5[M+H]^+$ , 306.13360, Found 306.13374.

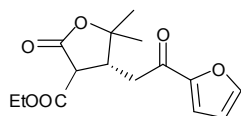

**(3S,4R)-ethyl 4-(2-(furan-2-yl)-2-oxoethyl)-5,5-dimethyl-2-oxotetrahydrofuran-3-carboxylate**

**3k:** Obtained in 91% yield, yellow solid; m.p. 107.8-109.2 °C;  $^1H$  NMR (400 MHz,  $CDCl_3$ )  $\delta$  7.61 (s, 1H),  $\delta$  7.24 (d,  $J = 3.2$  Hz, 1H),  $\delta$  6.56-6.59 (m, 1H),  $\delta$  4.23 (q,  $J = 7.2$  Hz, 2H),  $\delta$  3.50 (d,  $J = 11.6$  Hz, 1H),  $\delta$  3.24-3.32 (m, 1H),  $\delta$  2.92-3.10 (m, 2H),  $\delta$  1.55 (s, 3H),  $\delta$  1.34 (s, 3H),  $\delta$  1.27 (t,  $J = 7.2$  Hz, 3H);  $^{13}C$  NMR (100 MHz,  $CDCl_3$ ):  $\delta$  191.0, 175.3, 172.5, 157.1, 151.8, 122.7, 117.7, 90.4, 67.1, 58.1, 50.0, 42.9, 32.2, 28.0, 19.0; HPLC (AS, hexane:*i*-PrOH 70:30, 1.0 mL/min):  $t_R$  16.69 min (major enantiomer),  $t_R$  53.14 min (minor enantiomer); ee 79%;  $[\alpha]_D^{25} = +18.2$  ( $c = 1.1$ ,  $CHCl_3$ ). ES-HRMS: Calcd for  $C_{15}H_{19}O_6[M+H]^+$ , 295.11761, Found 295.11785.

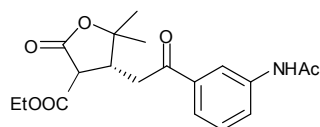

**(3S,4R)-ethyl 4-(2-(3-acetamidophenyl)-2-oxoethyl)-5,5-dimethyl-2-oxotetrahydrofuran-3-**



**carboxylate 3l:** Obtained in 64% yield, yellow oil;  $^1\text{H}$  NMR (400 MHz,  $\text{CDCl}_3$ )  $\delta$  8.58 (s, 1H),  $\delta$  8.13-8.17 (m, 1H),  $\delta$  7.75-7.85 (m, 1H),  $\delta$  7.58-7.64 (m, 1H),  $\delta$  7.36 (t,  $J = 8.0$  Hz, 1H),  $\delta$  4.18 (q,  $J = 7.2$  Hz, 2H),  $\delta$  3.47 (d,  $J = 11.2$  Hz, 1H),  $\delta$  3.05-3.32 (m, 3H),  $\delta$  2.17 (s, 3H),  $\delta$  1.50 (s, 3H),  $\delta$  1.32 (s, 3H),  $\delta$  1.21 (t,  $J = 7.2$  Hz, 3H);  $^{13}\text{C}$  NMR (100 MHz,  $\text{CDCl}_3$ ):  $\delta$  196.8, 171.2, 169.4, 168.1, 139.1, 136.6, 129.4, 124.9, 123.4, 119.2, 86.0, 62.1, 53.5, 45.1, 38.2, 27.3, 24.5, 23.0, 13.9; HPLC (AD, hexane:*i*-PrOH 50:50, 1.0 mL/min):  $t_{\text{R}}$  25.38 min (major enantiomer),  $t_{\text{R}}$  65.17 min (minor enantiomer); ee 93%;  $[\alpha]_{\text{D}}^{25} = -16.7$  ( $c = 1.2$ ,  $\text{CHCl}_3$ ). ES-HRMS: Calcd for  $\text{C}_{19}\text{H}_{27}\text{N}_2\text{O}_6[\text{M}+\text{H}]^+$ , 362.15981, Found 362.15983.

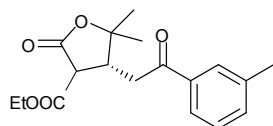

**(3S,4R)-ethyl 5,5-dimethyl-2-oxo-4-(2-oxo-2-m-tolyloethyl)tetrahydrofuran-3-carboxylate 3m:**

Obtained in 94% yield, white solid; m.p. 72.2-74.8°C;  $^1\text{H}$  NMR (400 MHz,  $\text{CDCl}_3$ )  $\delta$  7.72-7.78 (m, 2H),  $\delta$  7.35-7.45 (m, 2H),  $\delta$  4.27 (q,  $J = 7.2$  Hz, 2H),  $\delta$  3.47 (d,  $J = 11.6$  Hz, 1H),  $\delta$  3.31-3.38 (m, 1H),  $\delta$  3.08-3.24 (m, 2H),  $\delta$  2.43 (s, 3H),  $\delta$  1.56 (s, 3H),  $\delta$  1.37 (s, 3H),  $\delta$  1.30 (t,  $J = 7.2$  Hz, 3H);  $^{13}\text{C}$  NMR (100 MHz,  $\text{CDCl}_3$ ):  $\delta$  197.1, 170.5, 167.7, 138.7, 136.1, 134.5, 128.7, 128.6, 125.3, 85.5, 62.1, 53.4, 45.1, 38.3, 27.4, 23.1, 21.4, 14.0; HPLC (AS, hexane:*i*-PrOH 70:30, 1.0 mL/min):  $t_{\text{R}}$  13.60 min (major enantiomer),  $t_{\text{R}}$  25.12 min (minor enantiomer); ee 95%;  $[\alpha]_{\text{D}}^{25} = -10.9$  ( $c = 4.4$ ,  $\text{CHCl}_3$ ). ES-HRMS: Calcd for  $\text{C}_{18}\text{H}_{23}\text{O}_5[\text{M}+\text{H}]^+$ , 319.15400, Found 319.15426.

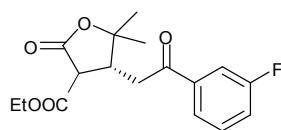

**(3S,4R)-ethyl 4-(2-(3-fluorophenyl)-2-oxoethyl)-5,5-dimethyl-2-oxotetrahydrofuran-3-**

**carboxylate 3n:** Obtained in 69% yield, colorless oil;  $^1\text{H}$  NMR (400 MHz,  $\text{CDCl}_3$ ):  $\delta$  7.73 (d,  $J = 8$  Hz, 1H),  $\delta$  7.58-7.65 (m, 1H),  $\delta$  7.45-7.52 (m, 1H),  $\delta$  7.28-7.35 (m, 1H),  $\delta$  4.27 (q,  $J = 7.2$  Hz, 2H),  $\delta$  3.47 (d,  $J = 11.6$  Hz, 1H),  $\delta$  3.27-3.36 (m, 1H),  $\delta$  3.07-3.24 (m, 2H),  $\delta$  1.55 (s, 3H),  $\delta$  1.37 (s, 3H),  $\delta$  1.29 (t,  $J = 6.8$  Hz, 3H);  $^{13}\text{C}$  NMR (100 MHz,  $\text{CDCl}_3$ ):  $\delta$  195.7, 170.3, 167.7, 162.8 (d, 246.9 Hz), 138.1 (d, 6.1 Hz), 130.6 (d, 7.6 Hz), 123.9 (d, 3.1 Hz), 120.7 (d, 21.4 Hz), 114.8 (d,

22.4 Hz), 85.4, 62.1, 53.3, 44.9, 38.4, 27.4, 23.1, 14.0; HPLC (AS, hexane:*i*-PrOH 70:30, 1.0 mL/min):  $t_R$  22.36 min (major enantiomer),  $t_R$  51.43 min (minor enantiomer); ee 94%;  $[\alpha]_D^{25} = -7.3$  ( $c = 3.8$ ,  $\text{CHCl}_3$ ). ES-HRMS: Calcd for  $\text{C}_{17}\text{H}_{20}\text{FO}_5[\text{M}+\text{H}]^+$ , 323.12893, Found 323.12950.

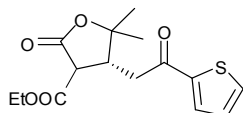

**(3S,4R)-ethyl 5,5-dimethyl-2-oxo-4-(2-oxo-2-(thiophen-2-yl)ethyl)tetrahydrofuran-3-**

**carboxylate 3o:** Obtained in 74% yield, colorless oil;  $^1\text{H}$  NMR (400 MHz,  $\text{CDCl}_3$ )  $\delta$  7.76 (d,  $J = 3.2$  Hz, 1H),  $\delta$  7.70 (d,  $J = 4.8$  Hz, 1H),  $\delta$  7.15-7.19 (m, 1H),  $\delta$  4.24 (q,  $J = 7.2$  Hz, 2H),  $\delta$  3.51 (d,  $J = 11.6$  Hz, 1H),  $\delta$  3.28-3.36 (m, 1H),  $\delta$  3.02-3.16 (m, 2H),  $\delta$  1.55 (s, 3H),  $\delta$  1.36 (s, 3H),  $\delta$  1.28 (t,  $J = 7.2$  Hz, 3H);  $^{13}\text{C}$  NMR (100 MHz,  $\text{CDCl}_3$ ):  $\delta$  189.7, 170.2, 167.5, 143.2, 134.7, 132.5, 128.4, 85.4, 62.2, 53.1, 45.4, 38.8, 27.4, 23.0, 14.0; HPLC (AS, hexane:*i*-PrOH 70:30, 1.0 mL/min):  $t_R$  29.58 min (major enantiomer),  $t_R$  112.54 min (minor enantiomer); ee 92%; Calcd for  $\text{C}_{15}\text{H}_{19}\text{O}_5\text{S}[\text{M}+\text{H}]^+$ , 311.09477, Found 311.09532.

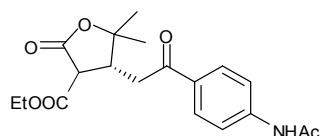

**(3S,4R)-ethyl 4-(2-(4-acetamidophenyl)-2-oxoethyl)-5,5-dimethyl-2-oxotetrahydrofuran-3-**

**carboxylate 3p:** Obtained in 94% yield, colorless oil;  $^1\text{H}$  NMR (400 MHz,  $\text{CDCl}_3$ )  $\delta$  7.90 (d,  $J = 8.0$  Hz, 2H),  $\delta$  7.85 (s, 1H),  $\delta$  7.67 (d,  $J = 8.0$  Hz, 2H),  $\delta$  4.27 (q,  $J = 6.8$  Hz, 2H),  $\delta$  3.47 (d,  $J = 11.2$  Hz, 1H),  $\delta$  3.28-3.37 (m, 1H),  $\delta$  3.04-3.22 (m, 2H),  $\delta$  2.23 (s, 3H),  $\delta$  1.55 (s, 3H),  $\delta$  1.37 (s, 3H),  $\delta$  1.29 (t,  $J = 7.2$  Hz, 3H);  $^{13}\text{C}$  NMR (100 MHz,  $\text{CDCl}_3$ ):  $\delta$  195.5, 170.6, 168.8, 167.8, 143.0, 131.6, 129.5, 119.0, 85.7, 62.2, 53.5, 45.2, 38.0, 27.4, 24.7, 23.1, 14.0; HPLC (AS, hexane:*i*-PrOH 70:30, 1.0 mL/min):  $t_R$  22.82 min (major enantiomer),  $t_R$  54.16 min (minor enantiomer); ee 96%;  $[\alpha]_D^{25} = 9.6$  ( $c = 4.6$ ,  $\text{CHCl}_3$ ). ES-HRMS: Calcd for  $\text{C}_{19}\text{H}_{24}\text{NO}_6[\text{M}+\text{H}]^+$ , 362.1604, Found 362.1604.

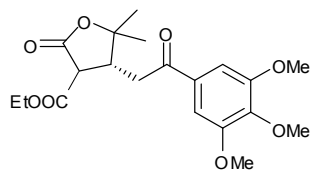

**(3S,4R)-ethyl 5,5-dimethyl-2-oxo-4-(2-oxo-2-(3,4,5-trimethoxyphenyl)ethyl)tetrahydrofuran-3-carboxylate 3q:** Obtained in 95% yield, white solid; m.p. 102.8.2-105.1 °C;  $^1\text{H}$  NMR (400 MHz,  $\text{CDCl}_3$ )  $\delta$  7.21 (s, 2H),  $\delta$  4.29 (q,  $J = 7.2$  Hz, 2H),  $\delta$  3.94 (s, 9H),  $\delta$  3.49 (d,  $J = 11.6$  Hz, 1H),  $\delta$  3.31-3.39 (m, 1H),  $\delta$  3.05-3.19 (m, 2H),  $\delta$  1.53 (s, 3H),  $\delta$  1.38 (s, 3H),  $\delta$  1.32 (t,  $J = 7.2$  Hz, 3H);  $^{13}\text{C}$  NMR (100 MHz,  $\text{CDCl}_3$ ):  $\delta$  195.9, 170.0, 167.6, 153.2, 143.2, 131.1, 105.8, 85.4, 62.2, 61.0, 56.4, 53.2, 45.4, 38.1, 27.5, 23.0, 14.0; HPLC (AS, hexane:*i*-PrOH 70:30, 1.0 mL/min):  $t_{\text{R}}$  29.09 min (major enantiomer),  $t_{\text{R}}$  69.52 min (minor enantiomer); ee 94%;  $[\alpha]_{\text{D}}^{25} = -18.6$  ( $c = 7.3$ ,  $\text{CHCl}_3$ ). ES-HRMS: Calcd for  $\text{C}_{20}\text{H}_{27}\text{O}_8[\text{M}+\text{H}]^+$ , 395.1706, Found 395.1699.

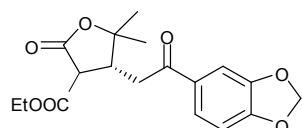

**(3S,4R)-ethyl 4-(2-(benzo[d][1,3]dioxol-5-yl)-2-oxoethyl)-5,5-dimethyl-2-oxotetrahydrofuran-3-carboxylate 3r:** Obtained in 78% yield, white solid; m.p. 100.1-102.7 °C;  $^1\text{H}$  NMR (400 MHz,  $\text{CDCl}_3$ )  $\delta$  7.54 (d,  $J = 7.6$  Hz, 1H),  $\delta$  7.39 (s, 1H),  $\delta$  6.86 (d,  $J = 8.0$  Hz, 1H),  $\delta$  6.06 (s, 2H),  $\delta$  4.25 (q,  $J = 6.8$  Hz, 2H),  $\delta$  3.45 (d,  $J = 11.6$  Hz, 1H),  $\delta$  3.25-3.34 (m, 1H),  $\delta$  2.98-3.16 (m, 2H),  $\delta$  1.53 (s, 3H),  $\delta$  1.35 (s, 3H),  $\delta$  1.29 (t,  $J = 6.8$  Hz, 3H);  $^{13}\text{C}$  NMR (100 MHz,  $\text{CDCl}_3$ ):  $\delta$  194.9, 170.4, 167.7, 152.3, 148.4, 130.9, 124.5, 108.0, 107.8, 102.0, 85.5, 62.1, 53.3, 45.3, 38.0, 27.4, 23.0, 14.0; HPLC (AS, hexane:*i*-PrOH 70:30, 1.0 mL/min):  $t_{\text{R}}$  36.95 min (major enantiomer),  $t_{\text{R}}$  104.12 min (minor enantiomer); ee 87%;  $[\alpha]_{\text{D}}^{25} = -12.9$  ( $c = 5.6$ ,  $\text{CHCl}_3$ ). ES-HRMS: Calcd for  $\text{C}_{18}\text{H}_{21}\text{O}_7[\text{M}+\text{H}]^+$ , 349.1287, Found 349.1293.

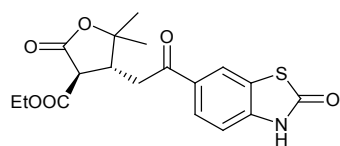

**(3S,4R)-ethyl 5,5-dimethyl-2-oxo-4-(2-oxo-2-(2-oxo-2,3-dihydrobenzo[d]thiazol-6-yl)ethyl)tetrahydrofuran-3-carboxylate 3s:** Obtained in 94% yield, white solid; m.p.

177.3-181.9°C;  $^1\text{H}$  NMR (400 MHz, DMSO)  $\delta$  8.26 (s, 1H),  $\delta$  7.90 (d,  $J = 8.4$  Hz, 1H),  $\delta$  7.22 (d,  $J = 8.4$  Hz, 1H),  $\delta$  4.09 (q,  $J = 6.4$  Hz, 2H),  $\delta$  3.38 (d,  $J = 17.6$  Hz, 1H),  $\delta$  3.20-3.30 (m, 1H),  $\delta$  2.99-3.06 (m, 1H),  $\delta$  1.48 (s, 3H),  $\delta$  1.35 (s, 3H),  $\delta$  1.14 (t,  $J = 6.8$  Hz, 3H);  $^{13}\text{C}$  NMR (100 MHz, DMSO):  $\delta$  196.7, 171.8, 170.9, 168.8, 140.8, 131.4, 127.5, 124.1, 123.8, 111.7, 86.3, 61.5, 53.2, 45.7, 37.8, 27.3, 23.2, 14.2; HPLC (AS, hexane:*i*-PrOH 70:30, 1.0 mL/min):  $t_{\text{R}}$  44.30 min (major enantiomer),  $t_{\text{R}}$  89.48 min (minor enantiomer); ee 98%;  $[\alpha]_{\text{D}}^{25} = -5.9$  ( $c = 6.1$ ,  $\text{CHCl}_3$ ). ES-HRMS: Calcd for  $\text{C}_{18}\text{H}_{20}\text{NO}_6\text{S}[\text{M}+\text{H}]^+$ , 378.1011, Found 378.1008.

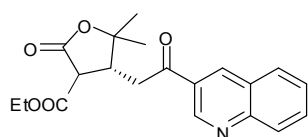

**(3S,4R)-ethyl 5,5-dimethyl-2-oxo-4-(2-oxo-2-(quinolin-3-yl)ethyl)tetrahydrofuran-3-**

**carboxylate 3t:** Obtained in 54% yield, white solid; m.p. 103.8-105.6°C;  $^1\text{H}$  NMR (400 MHz,  $\text{CDCl}_3$ )  $\delta$  9.37 (s, 1H),  $\delta$  8.71 (s, 1H),  $\delta$  8.14 (d,  $J = 8.4$  Hz, 1H),  $\delta$  7.95 (d,  $J = 7.6$  Hz, 1H),  $\delta$  7.85 (t,  $J = 7.2$  Hz, 1H),  $\delta$  7.64 (t,  $J = 7.2$  Hz, 1H),  $\delta$  4.25 (q,  $J = 6.8$  Hz, 2H),  $\delta$  3.52 (d,  $J = 11.2$  Hz, 1H),  $\delta$  3.20-3.42 (m, 3H),  $\delta$  1.56 (s, 3H),  $\delta$  1.39 (s, 3H),  $\delta$  1.26 (t,  $J = 6.8$  Hz, 3H);  $^{13}\text{C}$  NMR (100 MHz,  $\text{CDCl}_3$ ):  $\delta$  195.9, 170.2, 167.7, 150.0, 148.7, 137.3, 132.4, 129.5, 129.4, 128.3, 127.8, 126.7, 85.4, 62.2, 53.3, 44.9, 38.5, 27.4, 23.1, 14.2; HPLC (AS, hexane:*i*-PrOH 70:30, 1.0 mL/min):  $t_{\text{R}}$  23.31 min (major enantiomer),  $t_{\text{R}}$  43.32 min (minor enantiomer); ee 93%;  $[\alpha]_{\text{D}}^{25} = -11.3$  ( $c = 6.0$ ,  $\text{CHCl}_3$ ). ES-HRMS: Calcd for  $\text{C}_{20}\text{H}_{22}\text{NO}_5[\text{M}+\text{H}]^+$ , 356.1498, Found 356.1495.

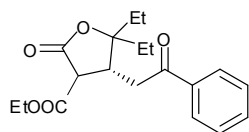

**(3S,4R)-ethyl 5,5-diethyl-2-oxo-4-(2-oxo-2-phenylethyl)tetrahydrofuran-3-carboxylate 3u:**

Obtained in 73% yield, colorless oil;  $^1\text{H}$  NMR (400 MHz,  $\text{CDCl}_3$ )  $\delta$  7.91-7.97 (m, 2H),  $\delta$  7.61 (t,  $J = 7.2$  Hz, 1H),  $\delta$  7.50 (t,  $J = 7.6$  Hz, 2H),  $\delta$  4.27 (q,  $J = 7.2$  Hz, 2H),  $\delta$  3.53-3.60 (m, 1H),  $\delta$  3.46 (d,  $J = 11.2$  Hz, 1H),  $\delta$  3.11-3.29 (m, 2H),  $\delta$  1.90-2.02 (m, 1H),  $\delta$  1.65-1.77 (m, 3H),  $\delta$  1.30 (t,  $J = 7.2$  Hz, 3H),  $\delta$  0.97-1.07 (m, 6H);  $^{13}\text{C}$  NMR (100 MHz,  $\text{CDCl}_3$ ):  $\delta$  197.0, 171.0, 168.0, 136.1, 133.7, 128.8, 128.1, 89.4, 62.1, 53.9, 41.3, 38.3, 29.1, 28.0, 14.0, 7.9, 7.6; HPLC (AS, hexane:*i*-PrOH 70:30, 1.0 mL/min):  $t_{\text{R}}$  13.58 min (major enantiomer),  $t_{\text{R}}$  33.38 min (minor enantiomer); ee 93%;

$[\alpha]_D^{25} = -9.7$  ( $c = 4.8$ ,  $\text{CHCl}_3$ ). ES-HRMS: Calcd for  $\text{C}_{19}\text{H}_{25}\text{O}_5[\text{M}+\text{H}]^+$ , 333.16965, Found 333.17025.

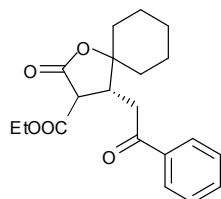

**(3S,4R)-ethyl 2-oxo-4-(2-oxo-2-phenylethyl)-1-oxaspiro[4.5]decane-3-carboxylate 3v:**

Obtained in 92% yield, colorless oil;  $^1\text{H}$  NMR (400 MHz,  $\text{CDCl}_3$ )  $\delta$  7.92-7.98 (m, 2H),  $\delta$  7.62 (t,  $J=7.2$  Hz, 1H)  $\delta$  7.50 (t,  $J=7.6$  Hz, 2H),  $\delta$  4.27 (q,  $J = 7.2$  Hz, 2H),  $\delta$  3.48 (d,  $J = 11.2$  Hz, 1H),  $\delta$  3.21-3.29 (m, 2H),  $\delta$  3.05-3.15 (m, 1H),  $\delta$  1.83-1.92 (m, 1H),  $\delta$  1.64-1.80 (m, 7H),  $\delta$  1.29 (t,  $J = 7.2$  Hz, 3H),  $\delta$  1.16-1.26 (m, 1H);  $^{13}\text{C}$  NMR (100 MHz,  $\text{CDCl}_3$ ):  $\delta$  197.0, 170.6 167.9, 136.2, 133.7, 128.8, 128.1, 86.8, 62.1, 53.1, 45.4, 38.2, 36.3, 32.2, 25.1, 22.5, 21.5, 14.0; HPLC (AS, hexane:*i*-PrOH 70:30, 1.0 mL/min):  $t_R$  42.76 min (major enantiomer),  $t_R$  34.69 min (minor enantiomer); ee 93%;  $[\alpha]_D^{25} = -10.4$  ( $c = 5.1$ ,  $\text{CHCl}_3$ ). ES-HRMS: Calcd for  $\text{C}_{20}\text{H}_{25}\text{O}_5[\text{M}+\text{H}]^+$ , 345.16965, Found 345.16982.

## NMR Spectra for Michael Product 3a-3v

### <sup>1</sup>H NMR and <sup>13</sup>C NMR spectra of 3a

| Parameter                | Value             |
|--------------------------|-------------------|
| 1 Solvent                | CDCl <sub>3</sub> |
| 2 Temperature            | 294.5             |
| 3 Number of Scans        | 8                 |
| 4 Pulse Width            | 14.6000           |
| 5 Spectrometer Frequency | 400.13            |
| 6 Spectral Width         | 8233.7            |
| 7 Lowest Frequency       | -1640.9           |
| 8 Nucleus                | <sup>1</sup> H    |

7.955  
7.686  
7.680  
7.612  
7.594  
7.515  
7.496  
7.477  
4.289  
4.271  
4.253  
4.235  
3.489  
3.461  
3.270  
3.207  
3.164  
3.158  
3.145  
3.130  
3.115  
1.285  
1.267

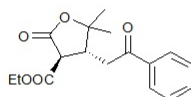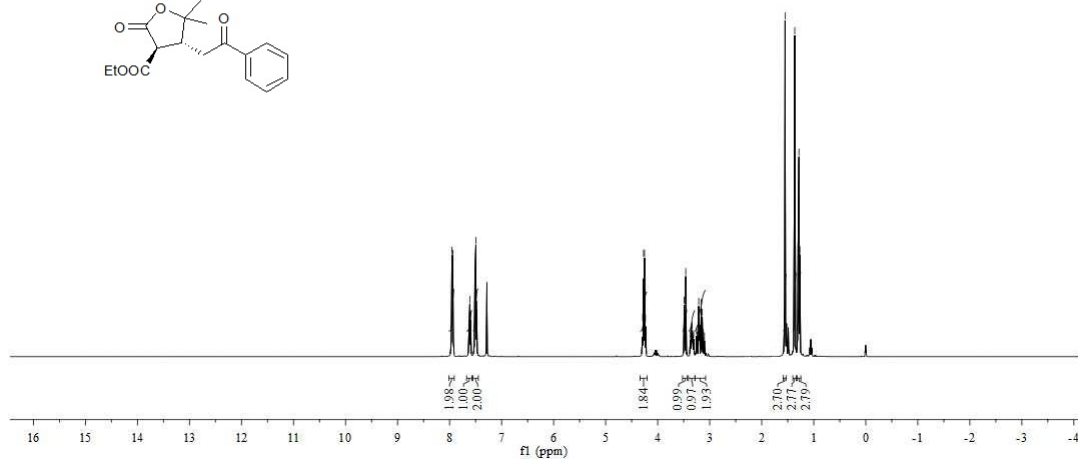

196.915  
170.446  
167.703  
136.066  
133.726  
128.853  
128.104  
85.405  
62.006  
53.388  
45.008  
38.225  
27.401  
25.082  
14.015

| Parameter                | Value             |
|--------------------------|-------------------|
| 1 Solvent                | CDCl <sub>3</sub> |
| 2 Temperature            | 295.9             |
| 3 Number of Scans        | 100               |
| 4 Pulse Width            | 9.0000            |
| 5 Spectrometer Frequency | 100.61            |
| 6 Spectral Width         | 28409.1           |
| 7 Lowest Frequency       | -3137.1           |
| 8 Nucleus                | <sup>13</sup> C   |

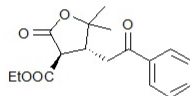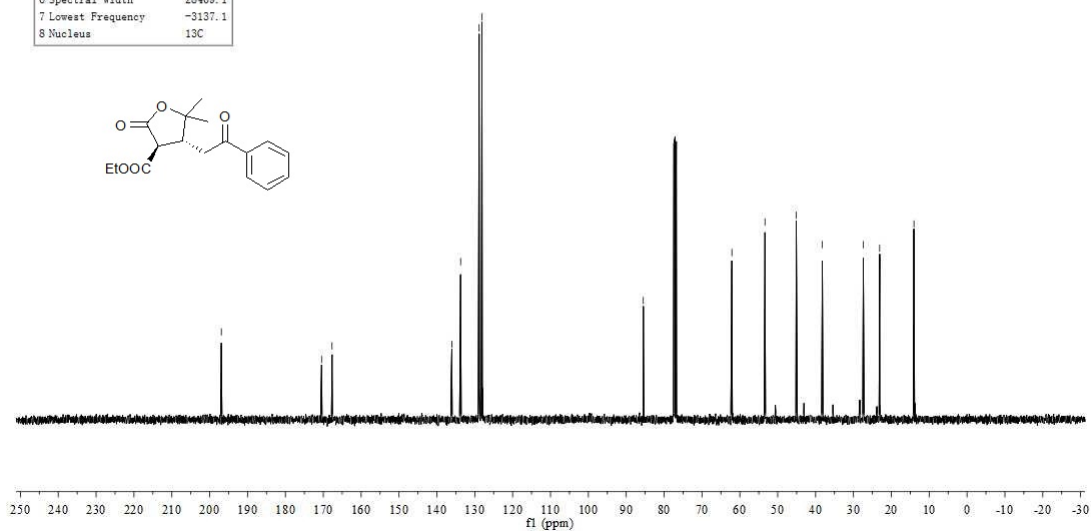

### <sup>1</sup>H NMR and <sup>13</sup>C NMR spectra of 3b

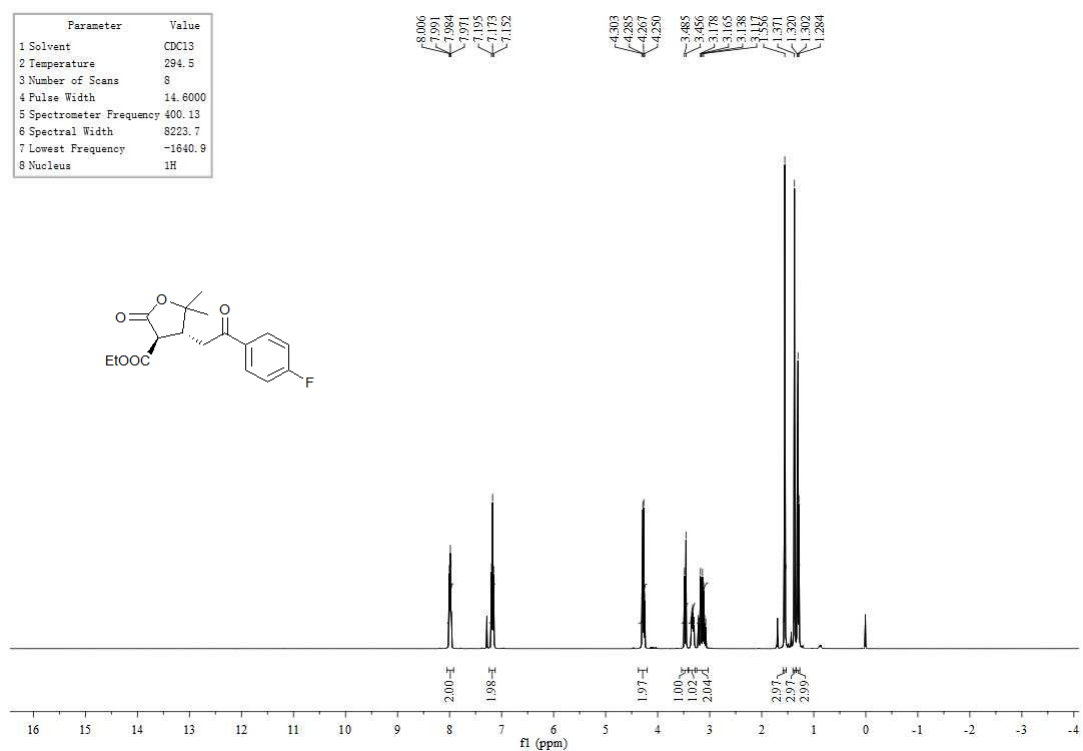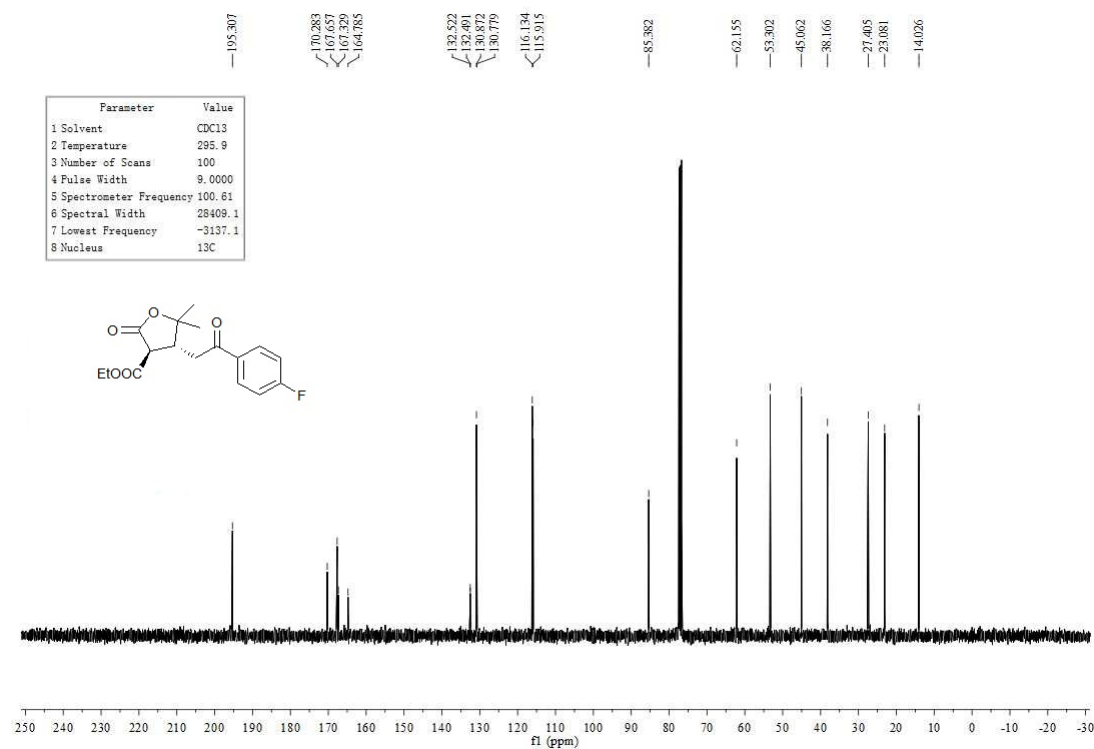

### <sup>1</sup>H NMR and <sup>13</sup>C NMR spectra of 3c

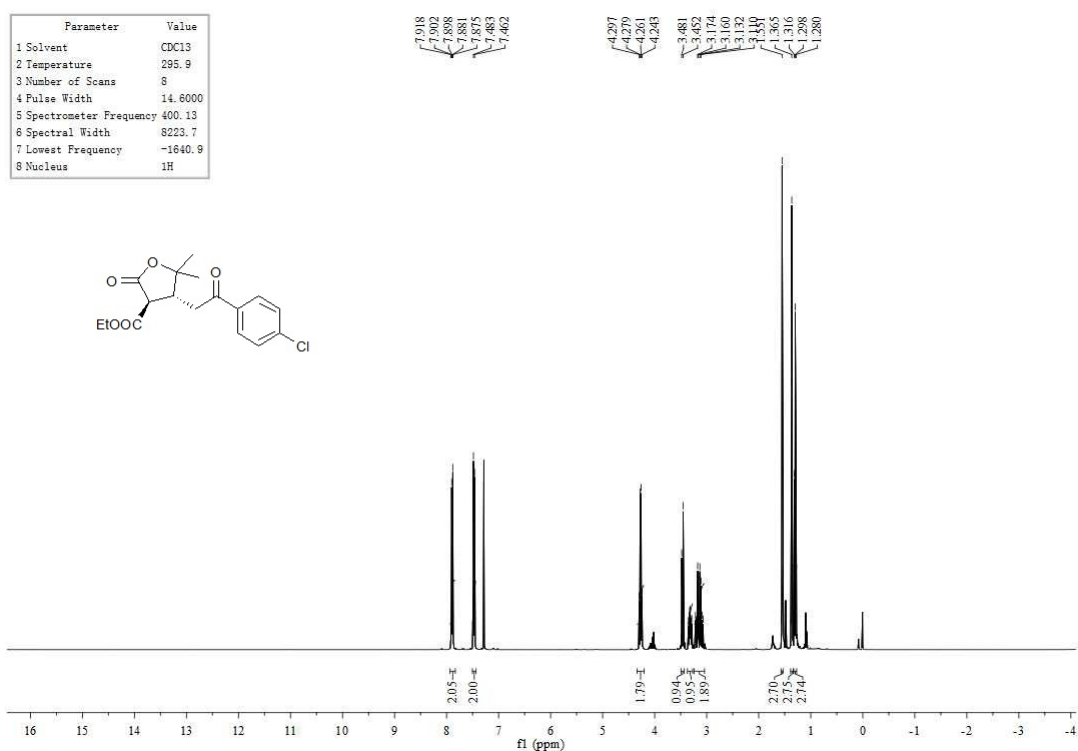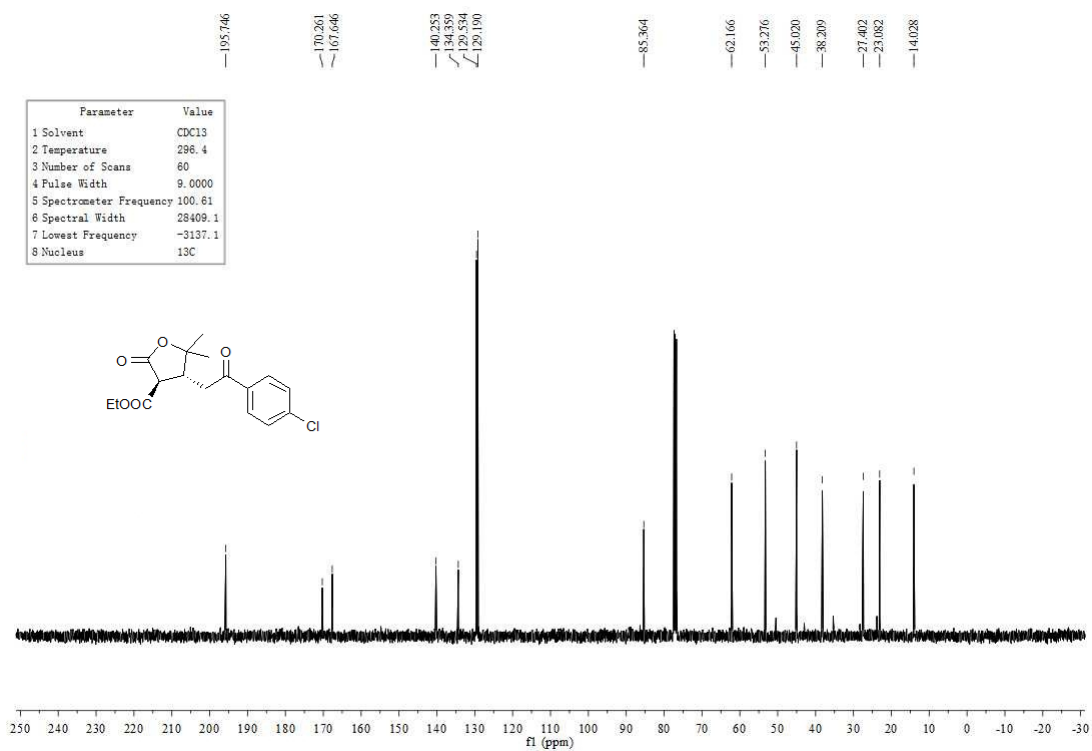



### <sup>1</sup>H NMR and <sup>13</sup>C NMR spectra of 3d

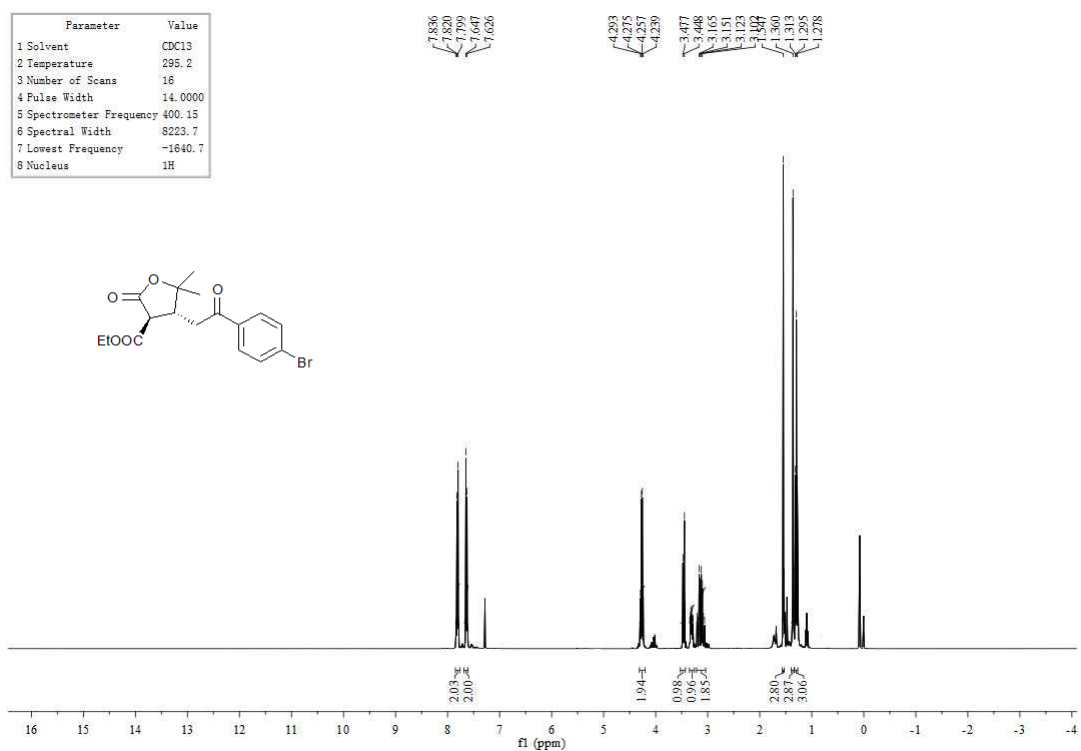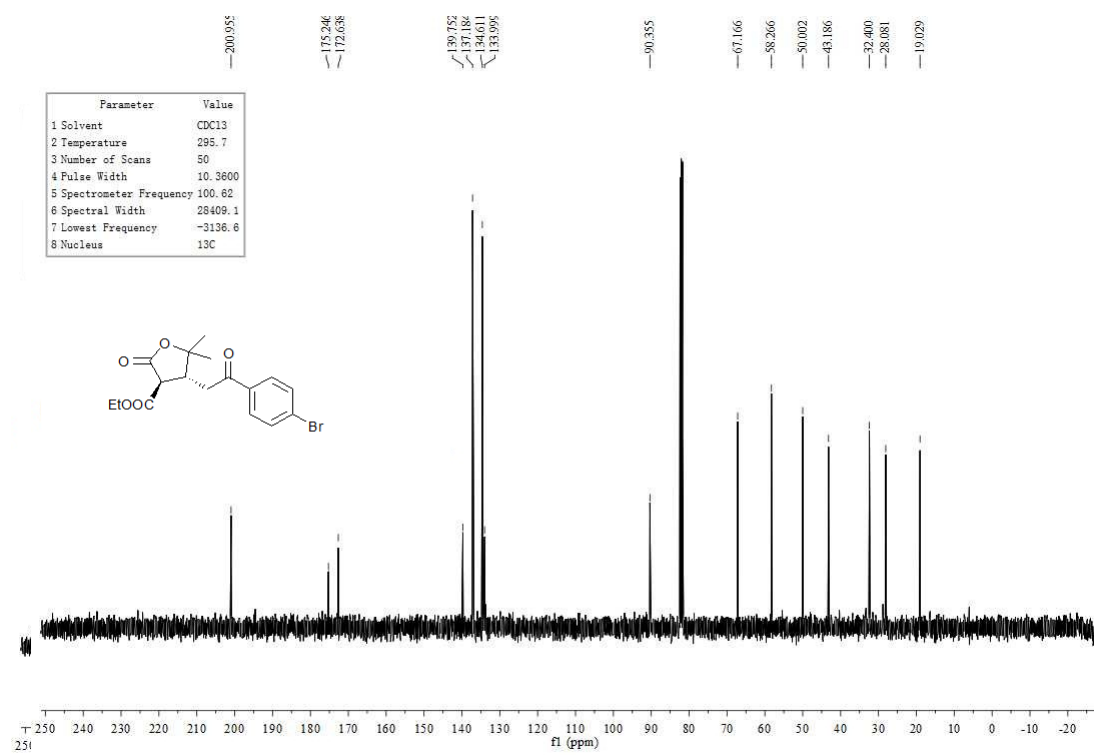

### <sup>1</sup>H NMR and <sup>13</sup>C NMR spectra of 3e

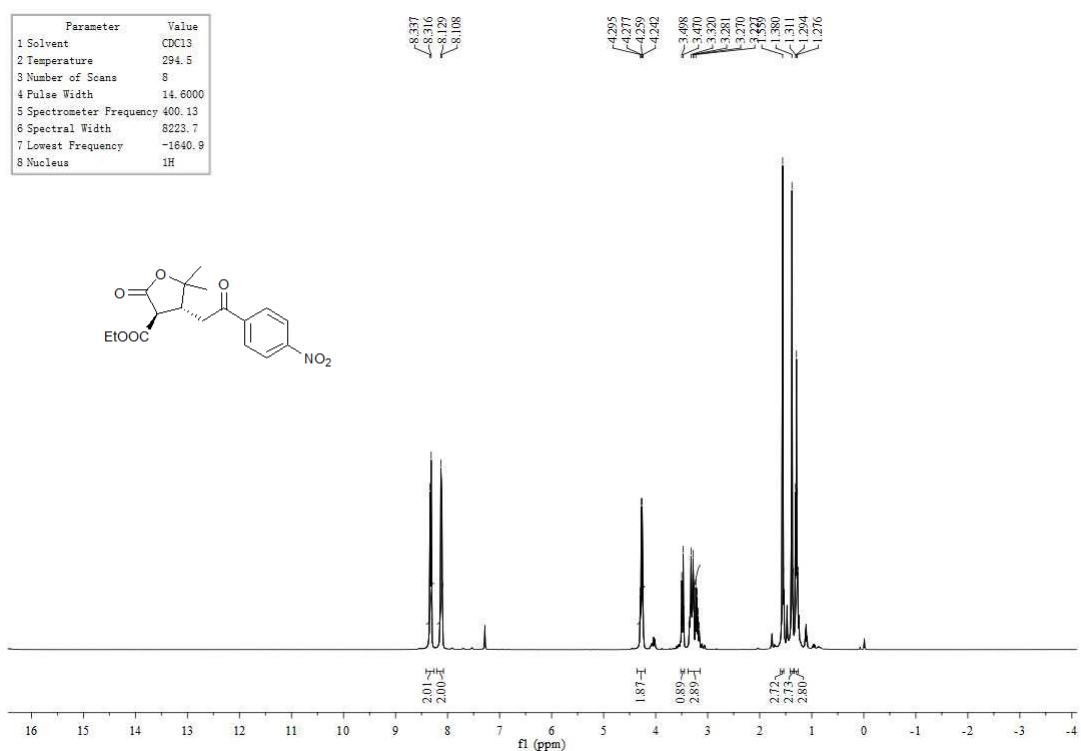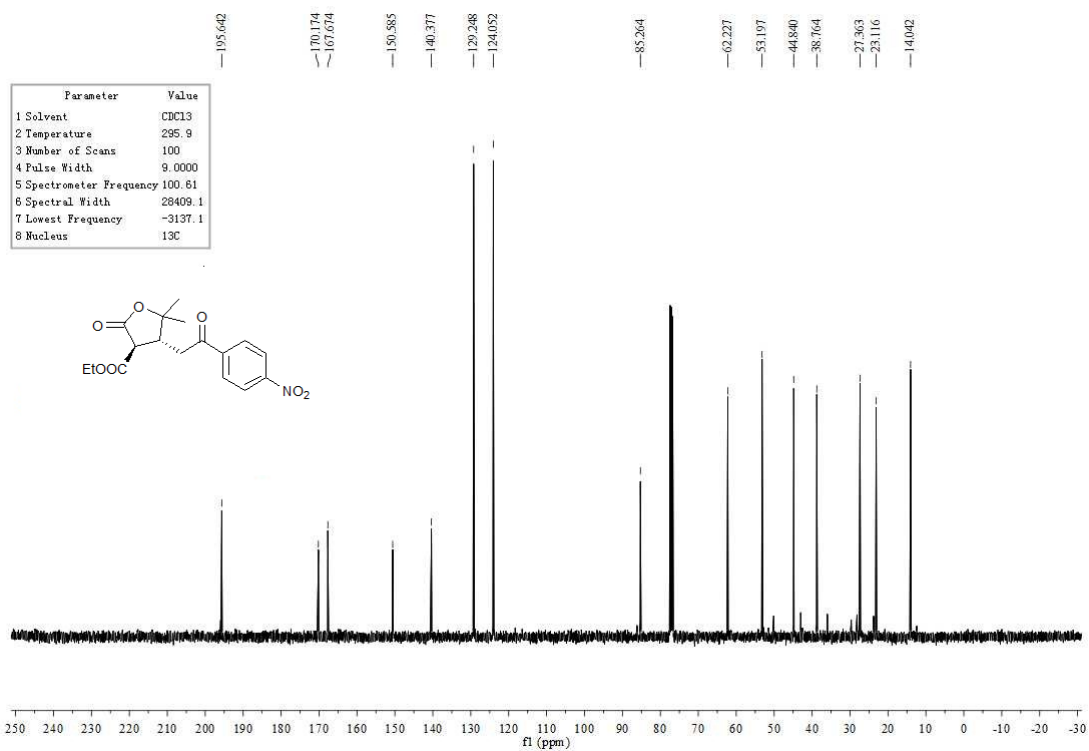

### <sup>1</sup>H NMR and <sup>13</sup>C NMR spectra of 3f

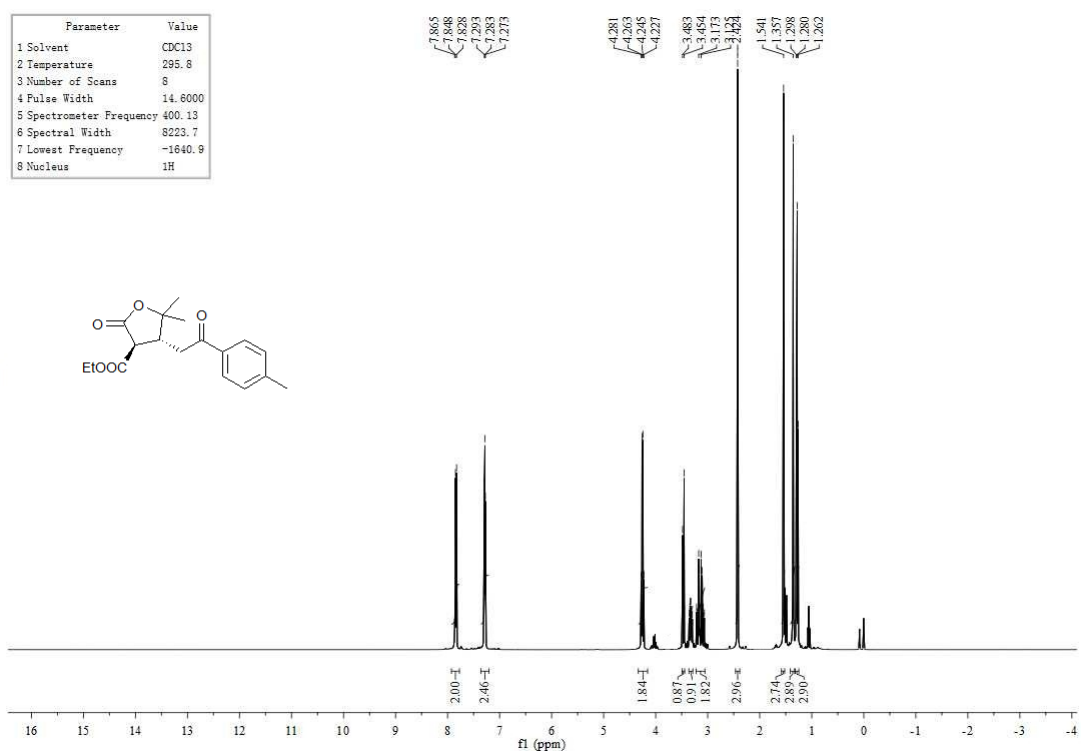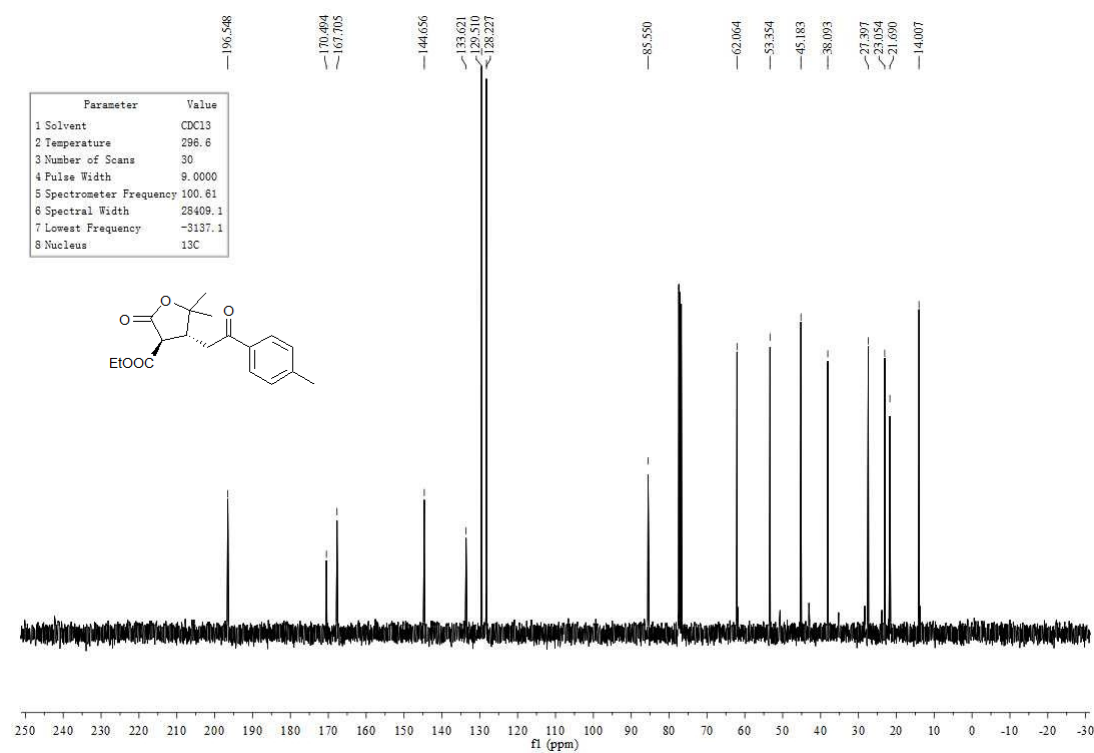

### <sup>1</sup>H NMR and <sup>13</sup>C NMR spectra of 3g

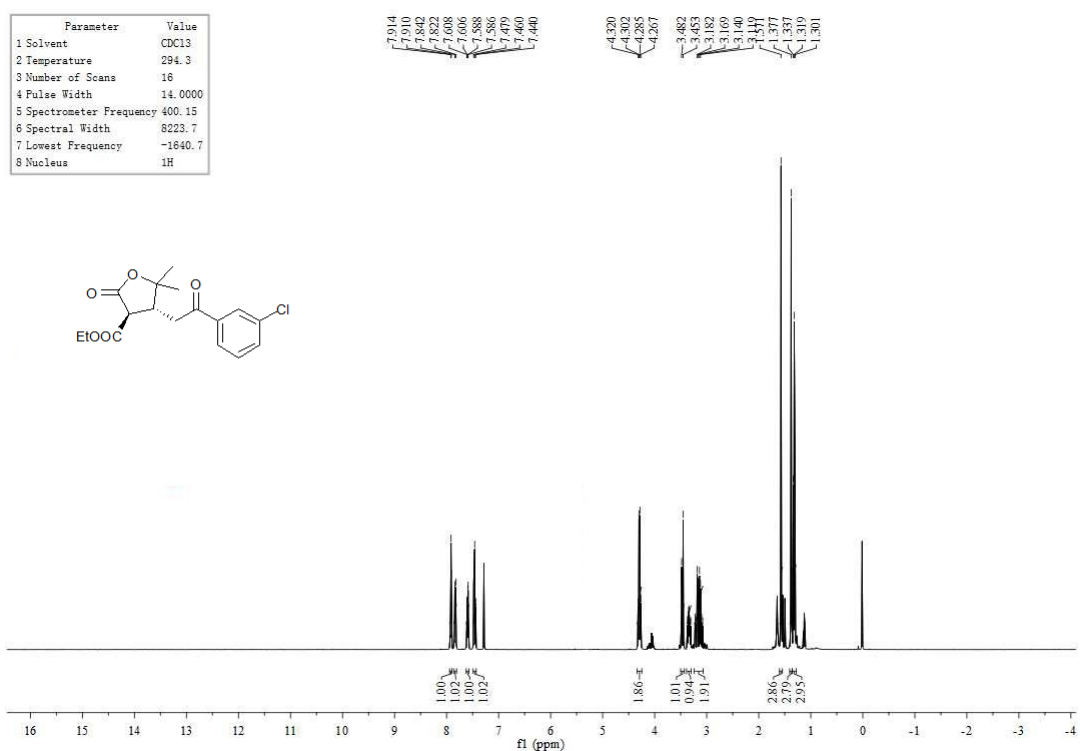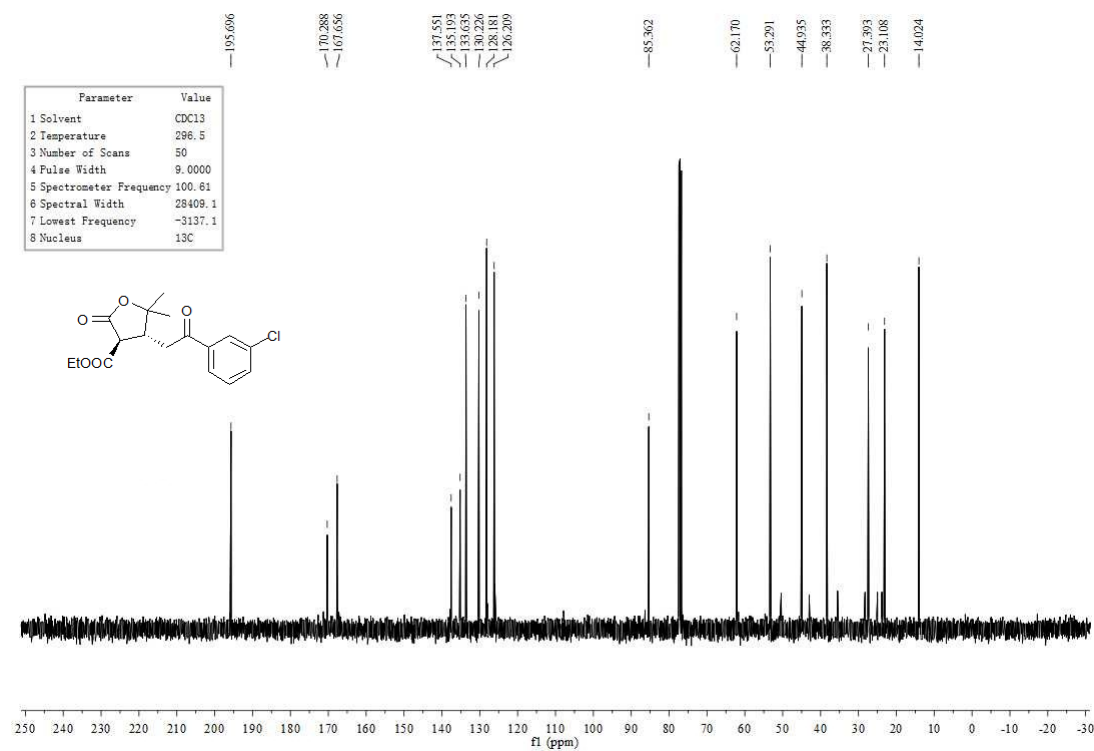

### <sup>1</sup>H NMR and <sup>13</sup>C NMR spectra of 3h

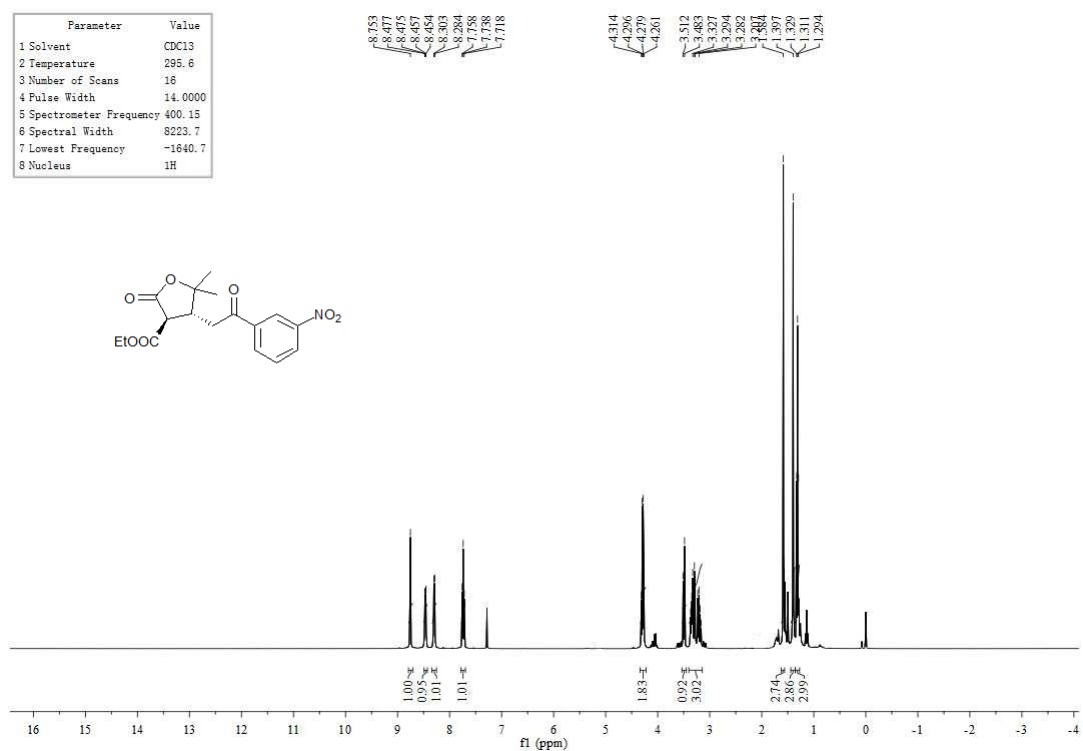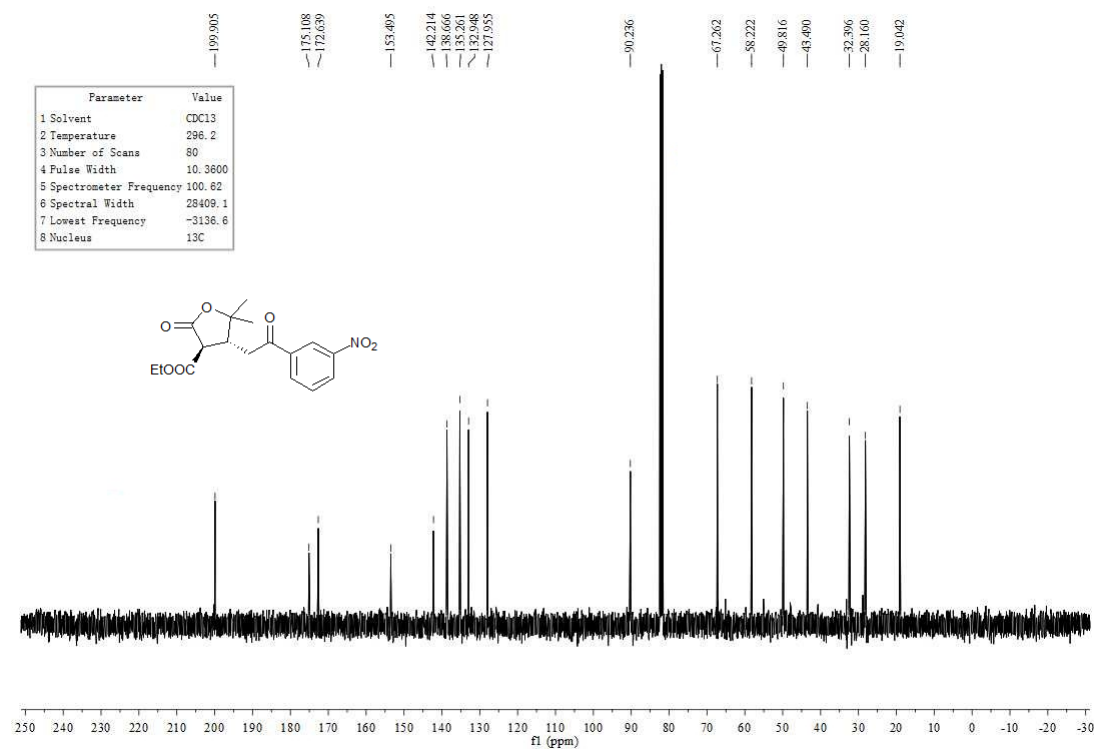

### <sup>1</sup>H NMR and <sup>13</sup>C NMR spectra of 3i

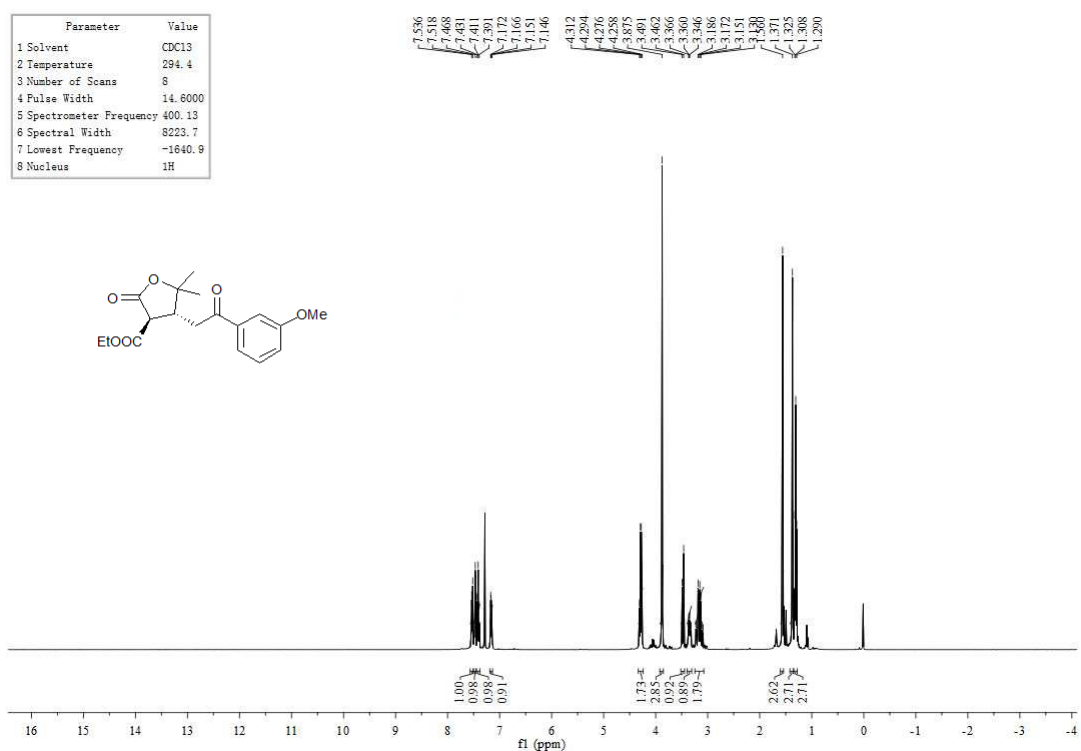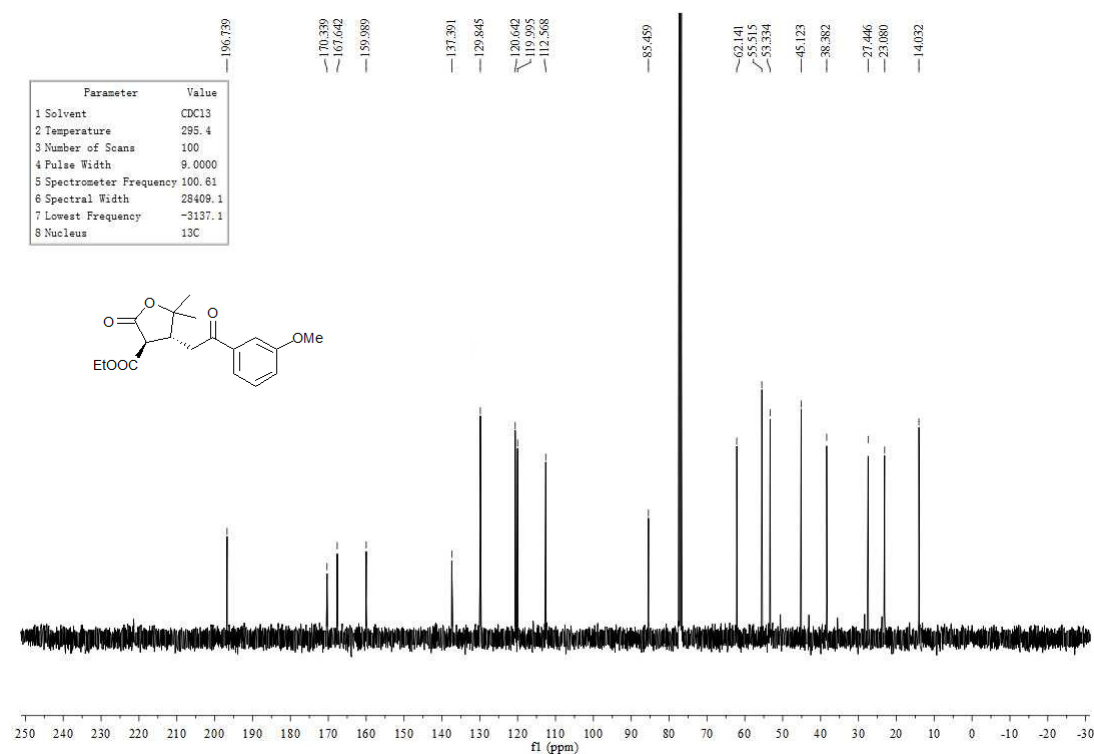

### <sup>1</sup>H NMR and <sup>13</sup>C NMR spectra of 3j

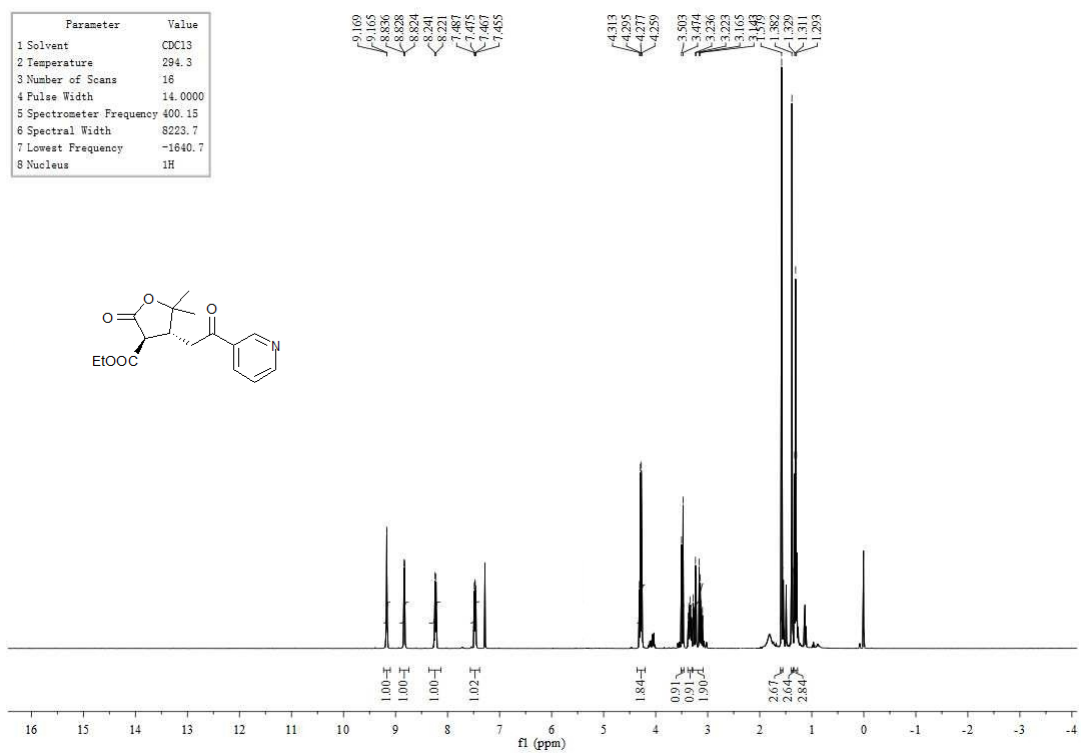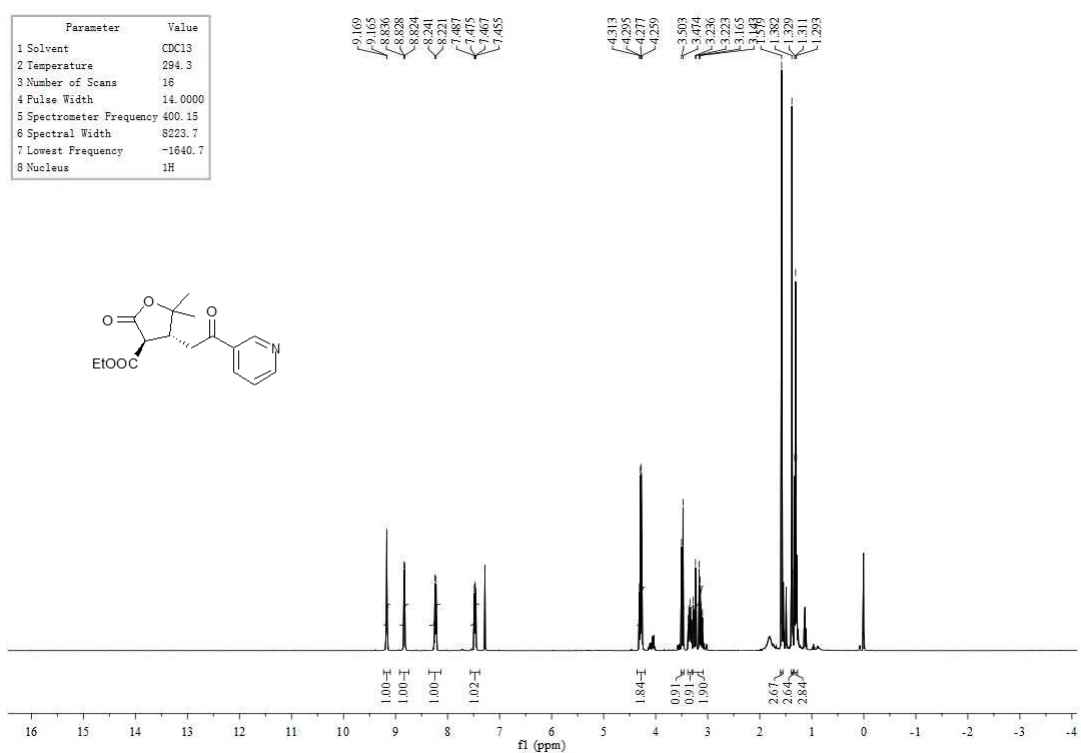

### <sup>1</sup>H NMR and <sup>13</sup>C NMR spectra of 3k

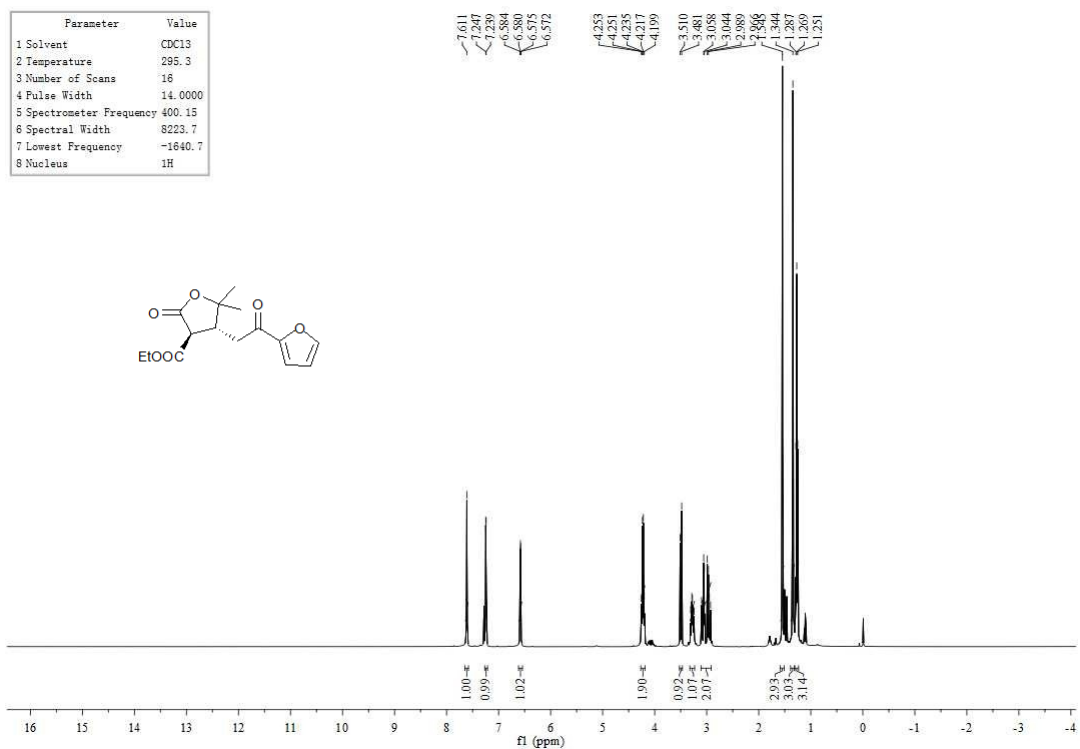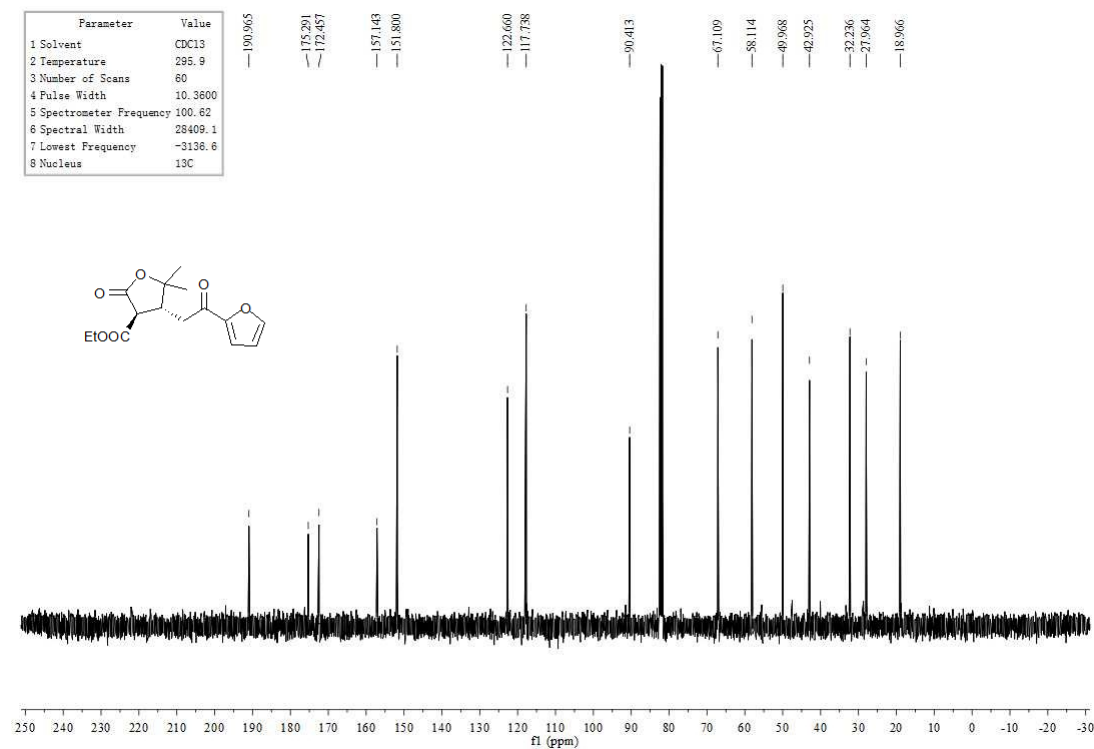



### <sup>1</sup>H NMR and <sup>13</sup>C NMR spectra of 3l

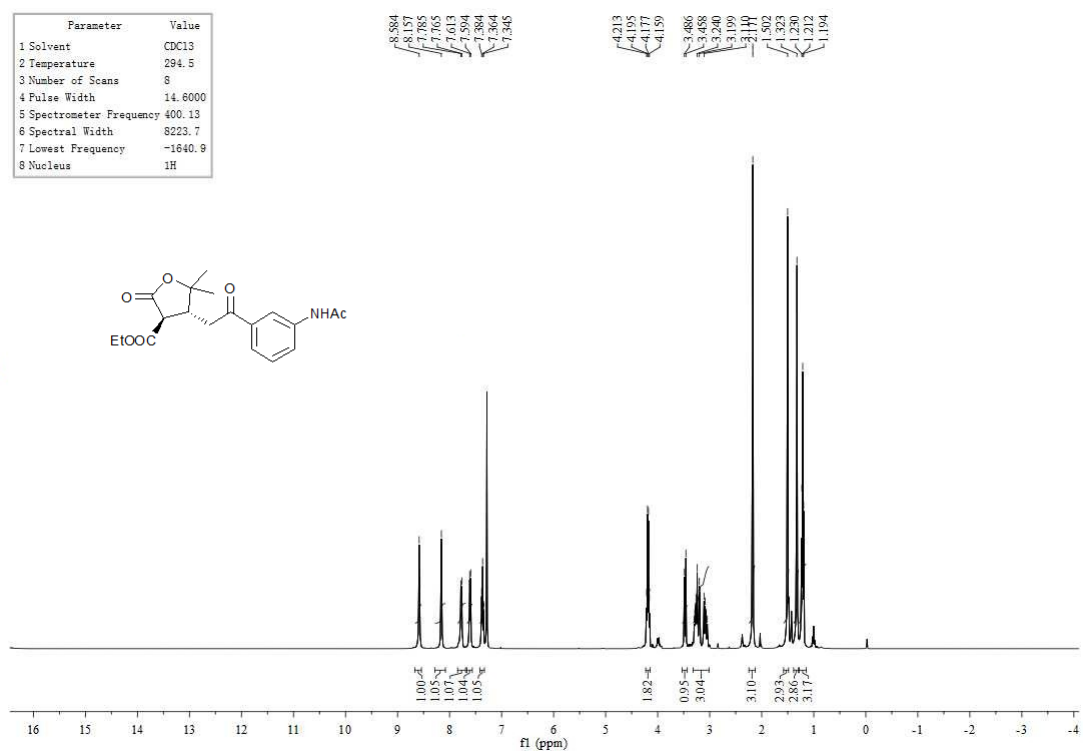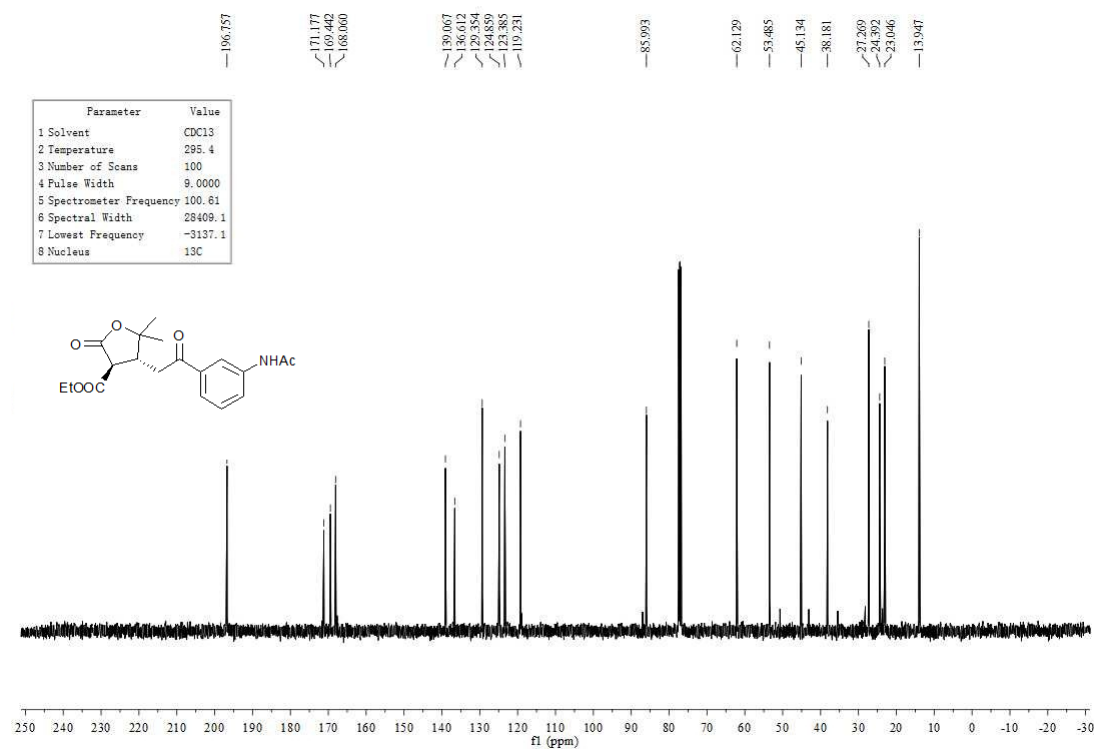

### <sup>1</sup>H NMR and <sup>13</sup>C NMR spectra of 3m

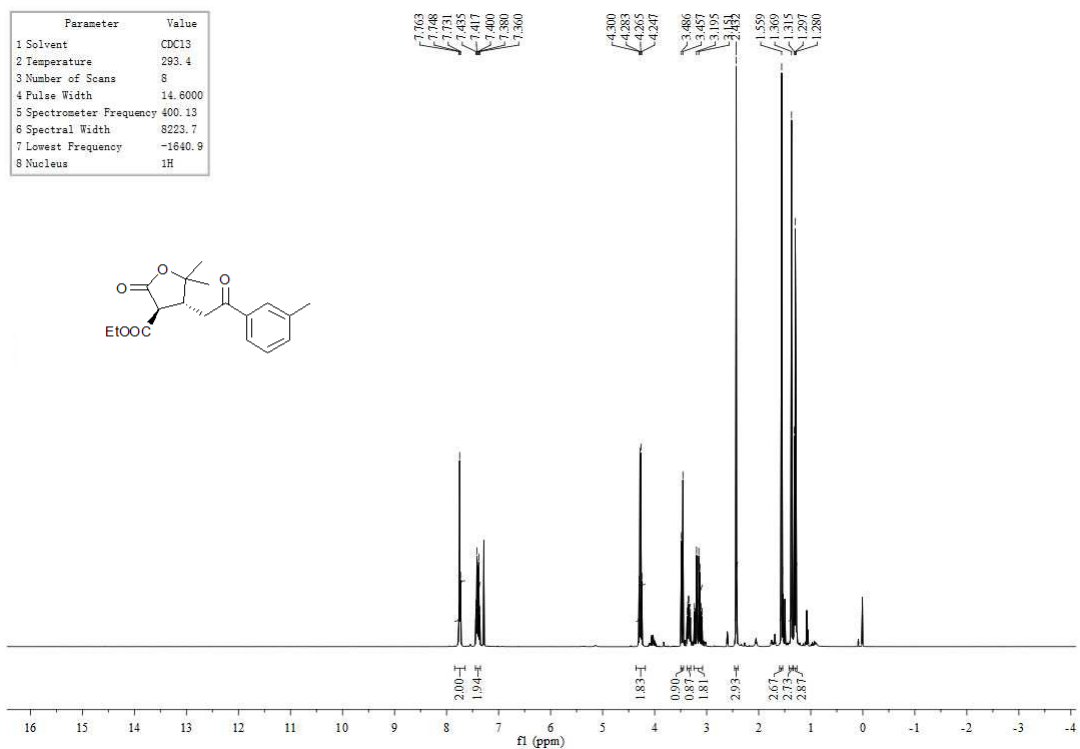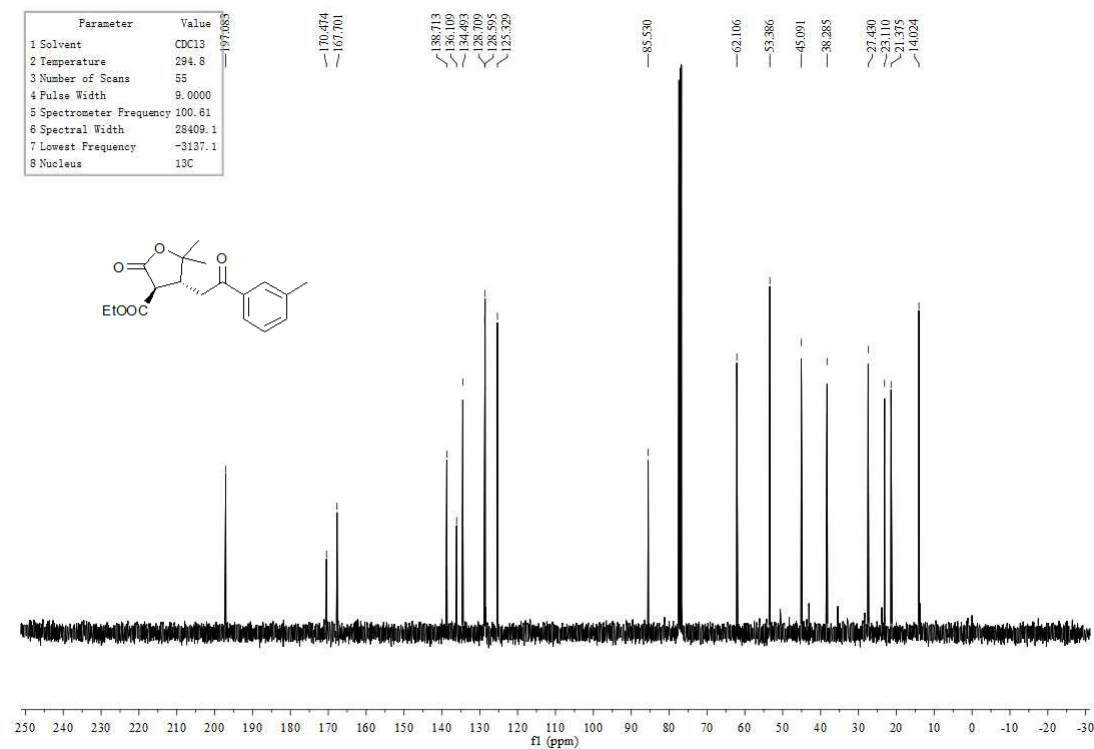

### <sup>1</sup>H NMR and <sup>13</sup>C NMR spectra of 3n

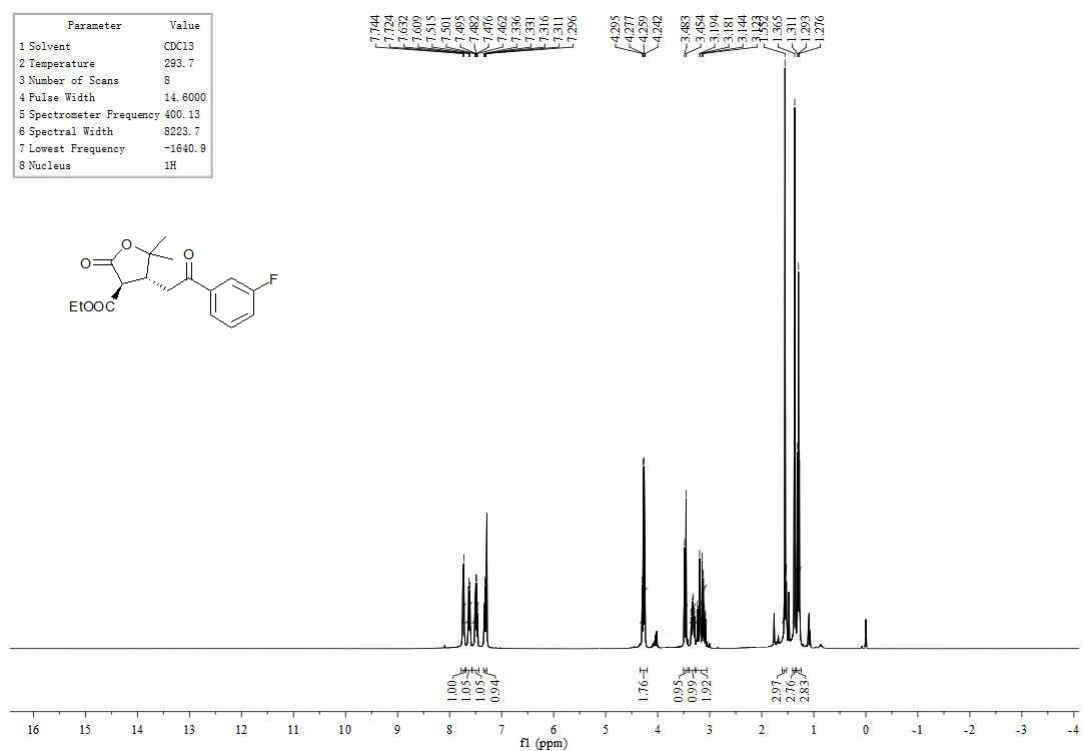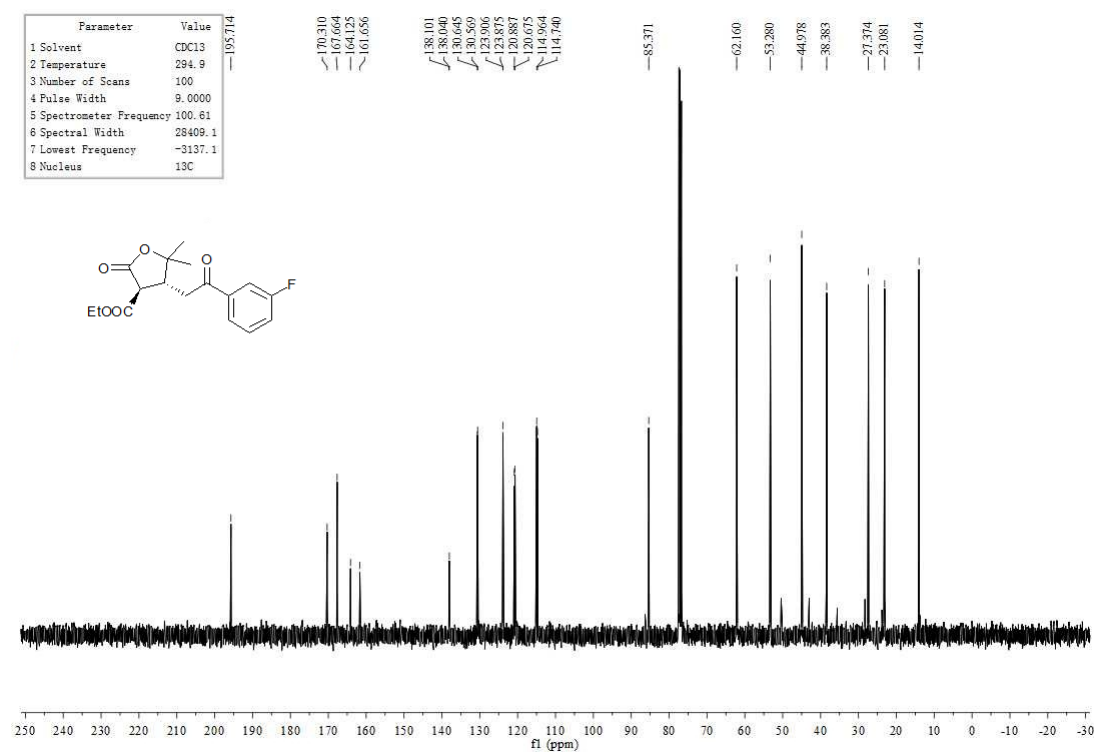

### <sup>1</sup>H NMR and <sup>13</sup>C NMR spectra of 3o

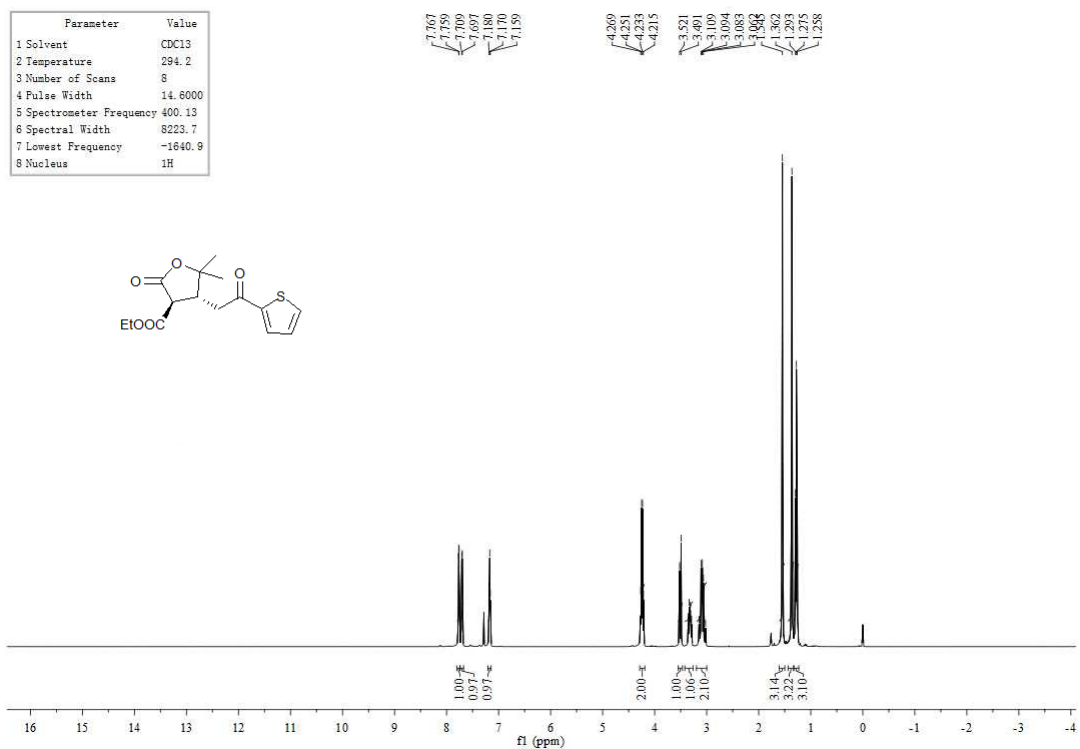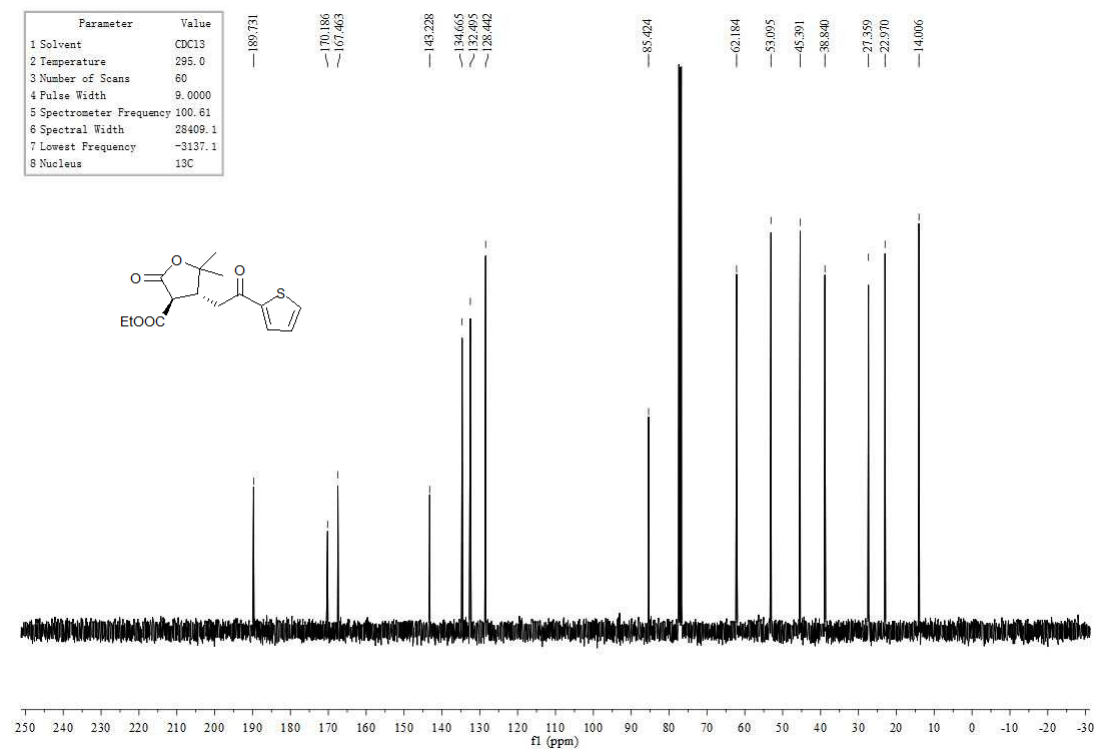

### <sup>1</sup>H NMR and <sup>13</sup>C NMR spectra of 3p

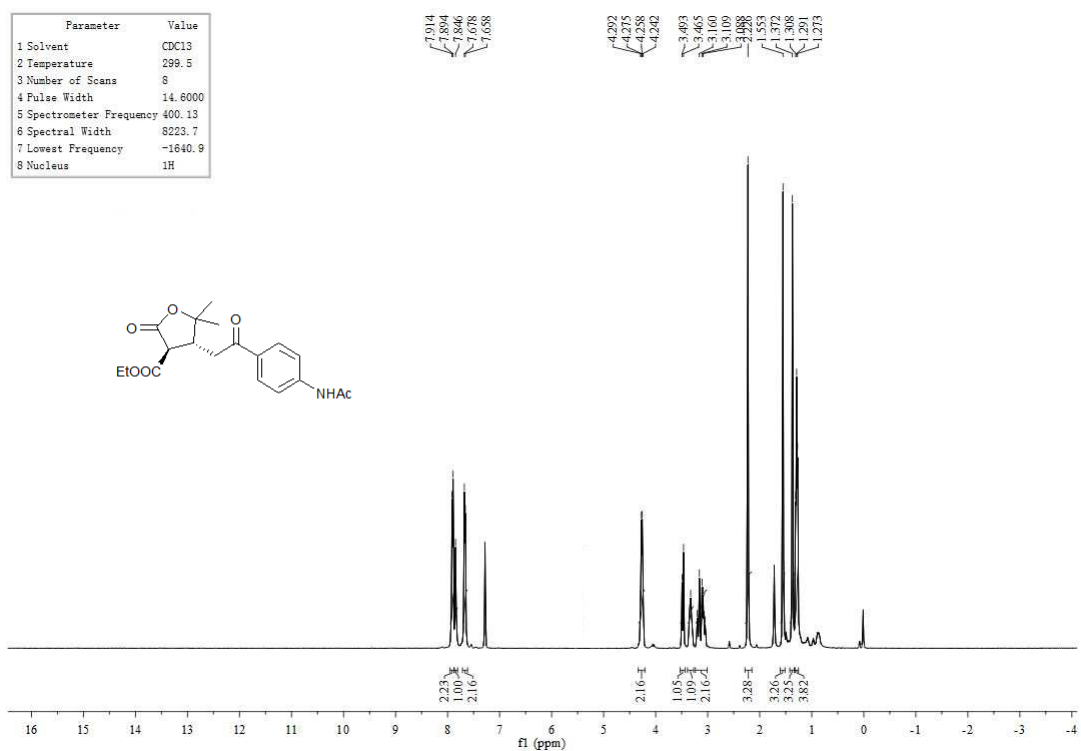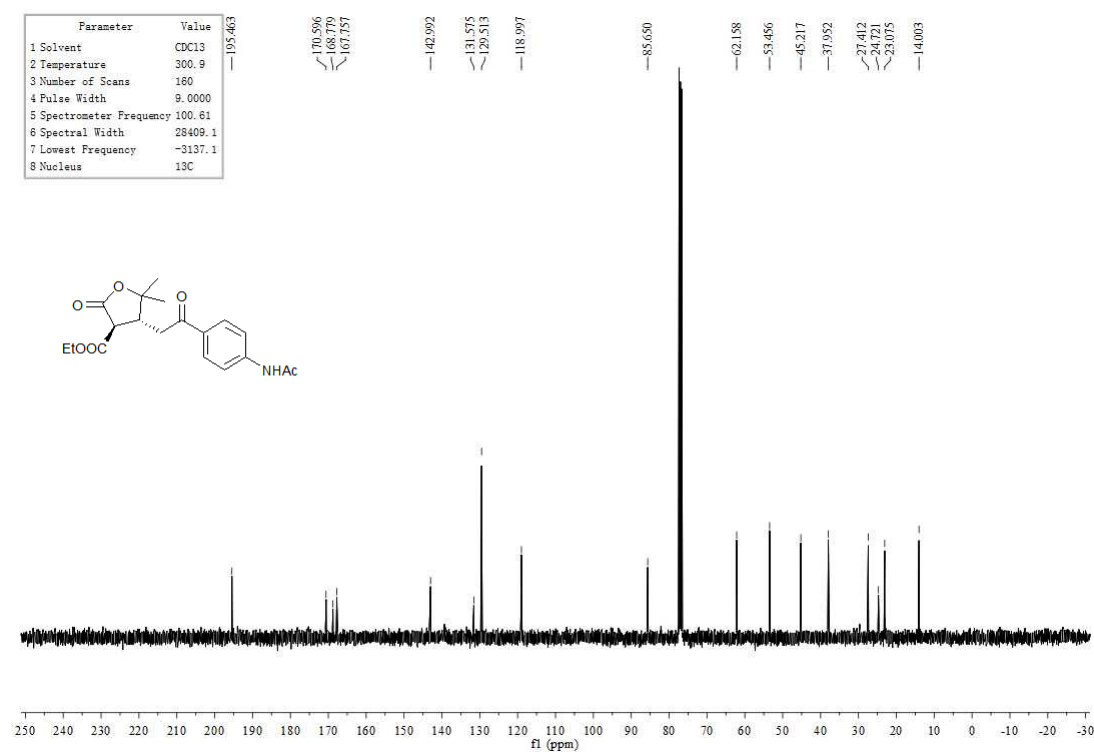

### <sup>1</sup>H NMR and <sup>13</sup>C NMR spectra of 3q

| Parameter                | Value             |
|--------------------------|-------------------|
| 1 Solvent                | CDCl <sub>3</sub> |
| 2 Temperature            | 297.4             |
| 3 Number of Scans        | 8                 |
| 4 Pulse Width            | 14.6000           |
| 5 Spectrometer Frequency | 400.13            |
| 6 Spectral Width         | 8223.7            |
| 7 Lowest Frequency       | -1640.9           |
| 8 Nucleus                | <sup>1</sup> H    |

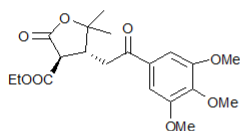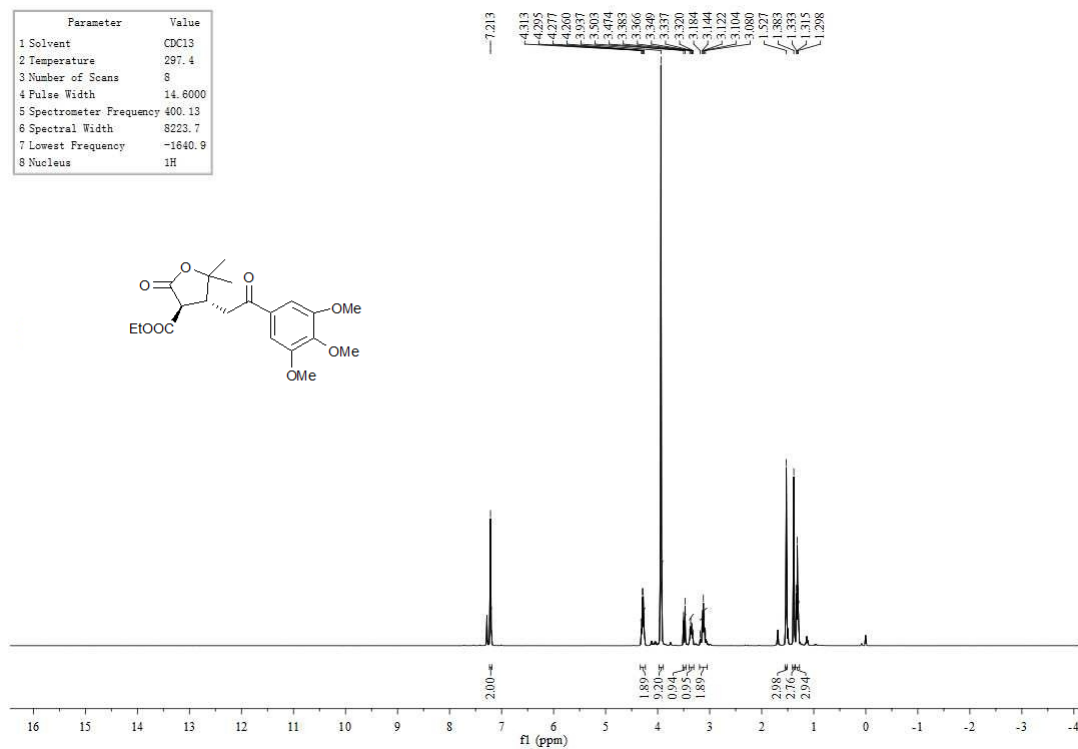

| Parameter                | Value             |
|--------------------------|-------------------|
| 1 Solvent                | CDCl <sub>3</sub> |
| 2 Temperature            | 298.9             |
| 3 Number of Scans        | 100               |
| 4 Pulse Width            | 9.0000            |
| 5 Spectrometer Frequency | 100.61            |
| 6 Spectral Width         | 28409.1           |
| 7 Lowest Frequency       | -3137.1           |
| 8 Nucleus                | <sup>13</sup> C   |

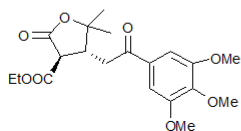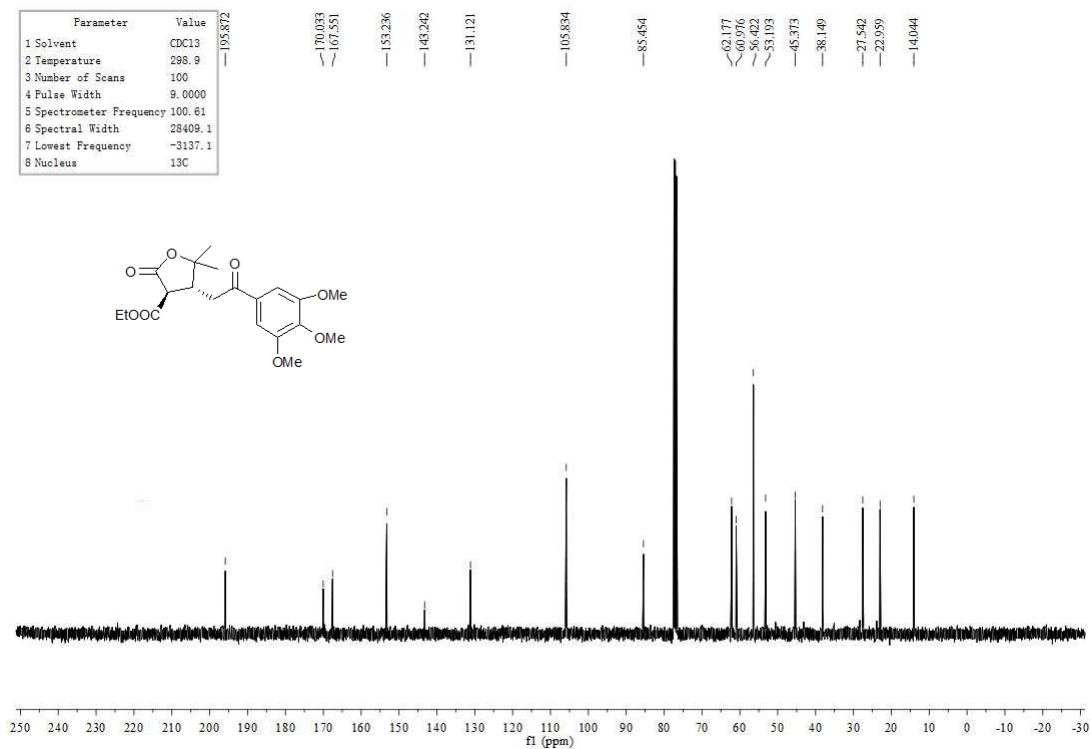

### <sup>1</sup>H NMR and <sup>13</sup>C NMR spectra of 3r

| Parameter                | Value             |
|--------------------------|-------------------|
| 1 Solvent                | CDCl <sub>3</sub> |
| 2 Temperature            | 299.8             |
| 3 Number of Scans        | 8                 |
| 4 Pulse Width            | 14.6000           |
| 5 Spectrometer Frequency | 400.13            |
| 6 Spectral Width         | 8223.7            |
| 7 Lowest Frequency       | -1640.9           |
| 8 Nucleus                | <sup>1</sup> H    |

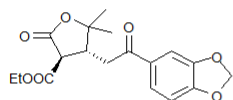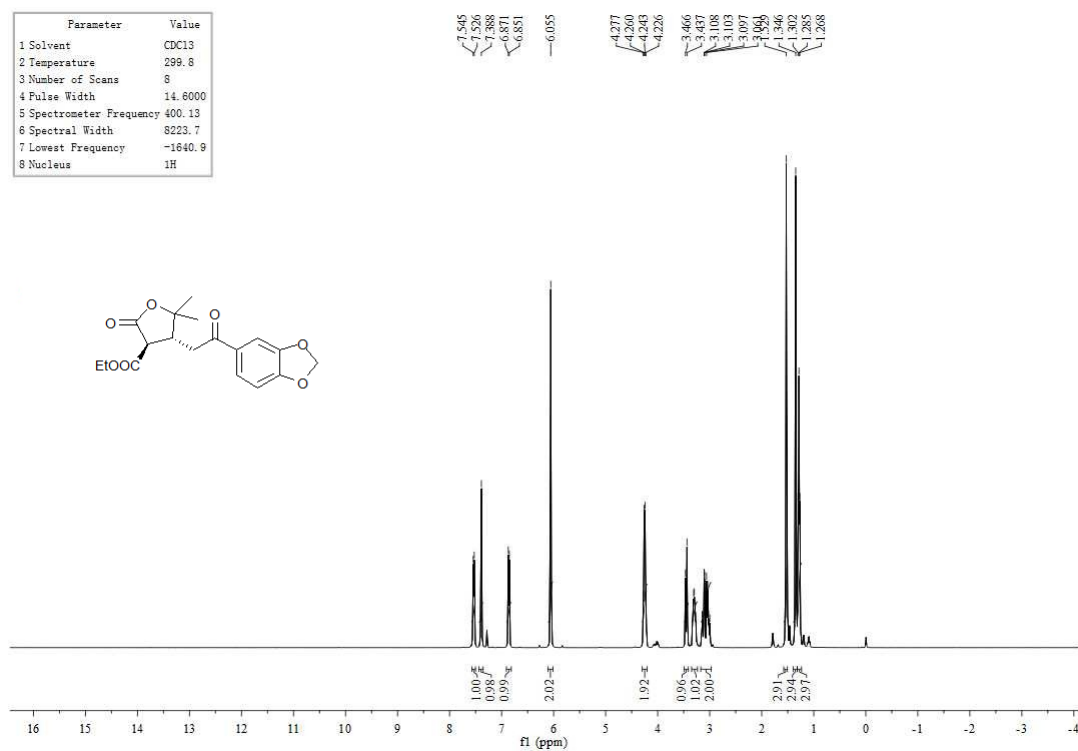

| Parameter                | Value             |
|--------------------------|-------------------|
| 1 Solvent                | CDCl <sub>3</sub> |
| 2 Temperature            | 301.2             |
| 3 Number of Scans        | 50                |
| 4 Pulse Width            | 9.0000            |
| 5 Spectrometer Frequency | 100.61            |
| 6 Spectral Width         | 28409.1           |
| 7 Lowest Frequency       | -3137.1           |
| 8 Nucleus                | <sup>13</sup> C   |

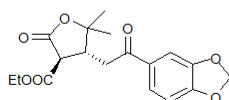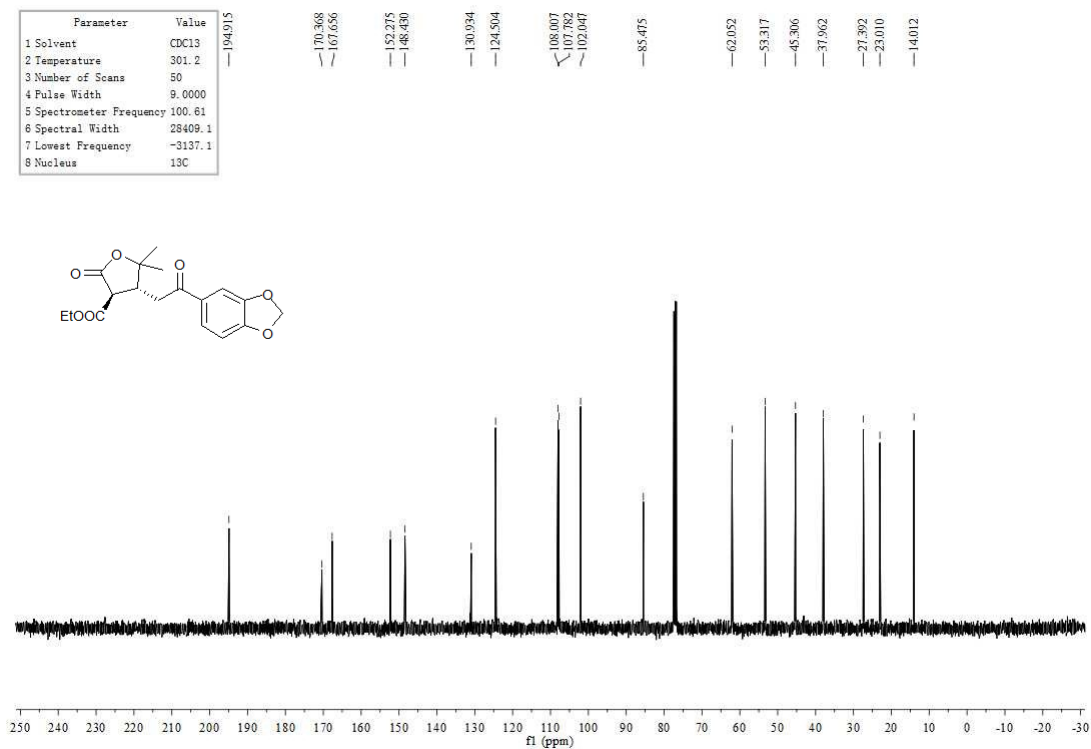

### <sup>1</sup>H NMR and <sup>13</sup>C NMR spectra of 3s

| Parameter                | Value          |
|--------------------------|----------------|
| 1 Solvent                | DMSO           |
| 2 Temperature            | 297.6          |
| 3 Number of Scans        | 8              |
| 4 Pulse Width            | 14.6000        |
| 5 Spectrometer Frequency | 400.13         |
| 6 Spectral Width         | 8223.7         |
| 7 Lowest Frequency       | -1640.9        |
| 8 Nucleus                | <sup>1</sup> H |

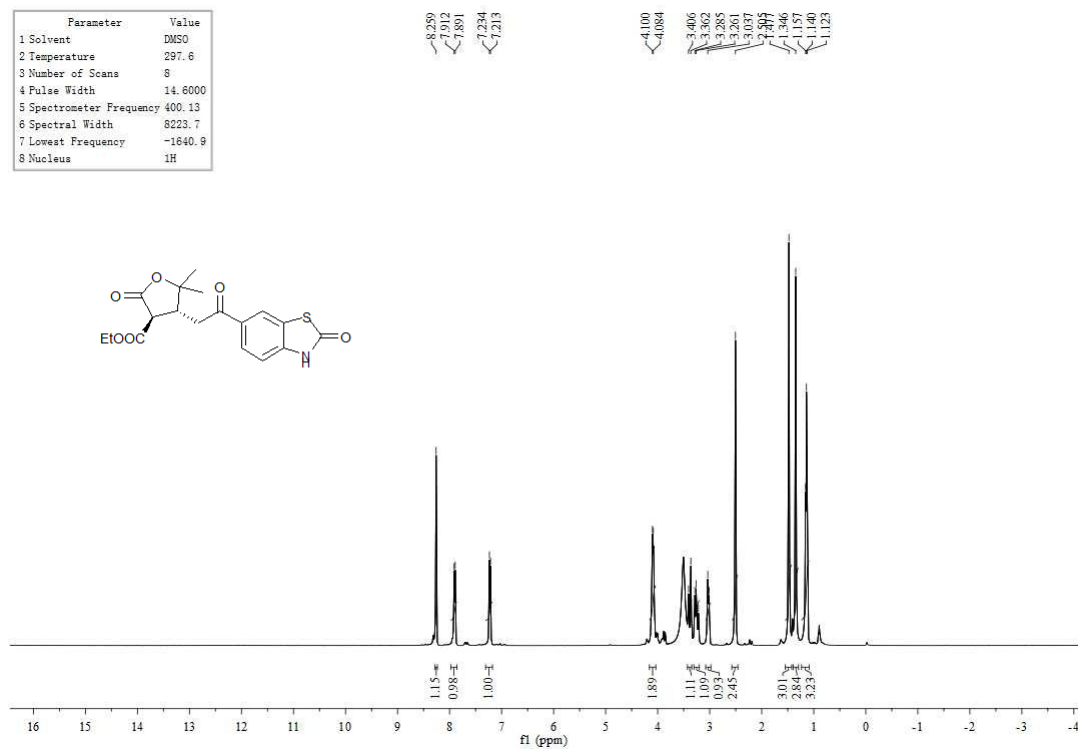

| Parameter                | Value           |
|--------------------------|-----------------|
| 1 Solvent                | DMSO            |
| 2 Temperature            | 298.4           |
| 3 Number of Scans        | 150             |
| 4 Pulse Width            | 9.0000          |
| 5 Spectrometer Frequency | 100.61          |
| 6 Spectral Width         | 28409.1         |
| 7 Lowest Frequency       | -3137.1         |
| 8 Nucleus                | <sup>13</sup> C |

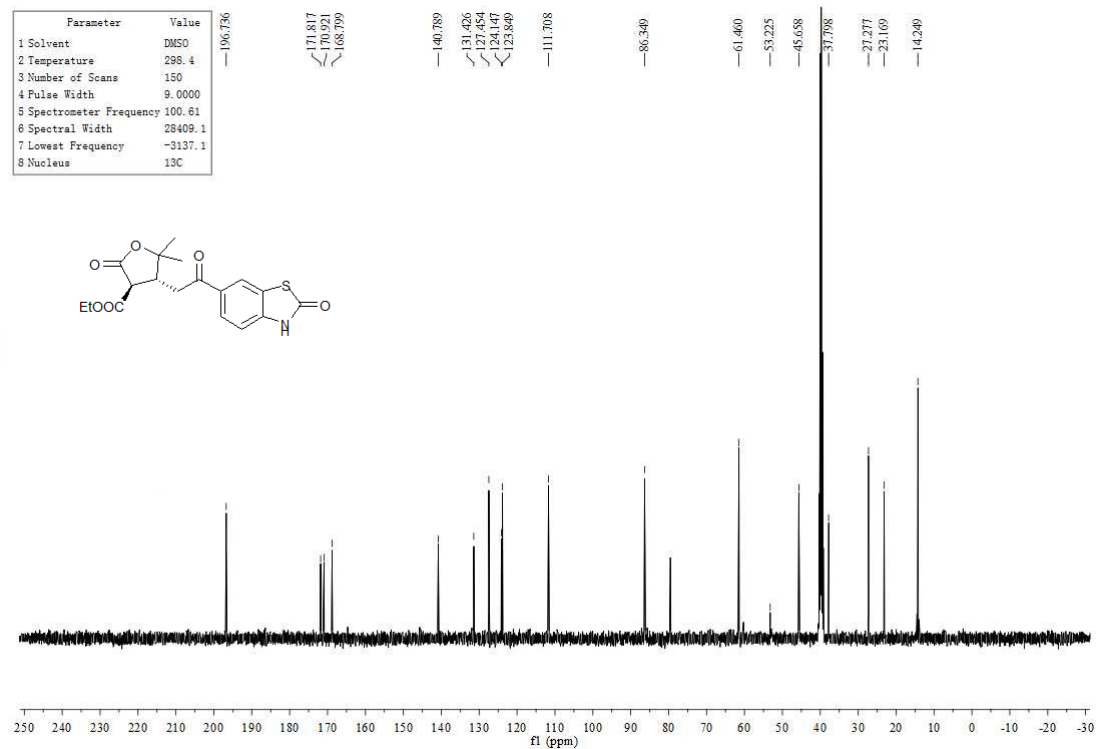



### <sup>1</sup>H NMR and <sup>13</sup>C NMR spectra of 3t

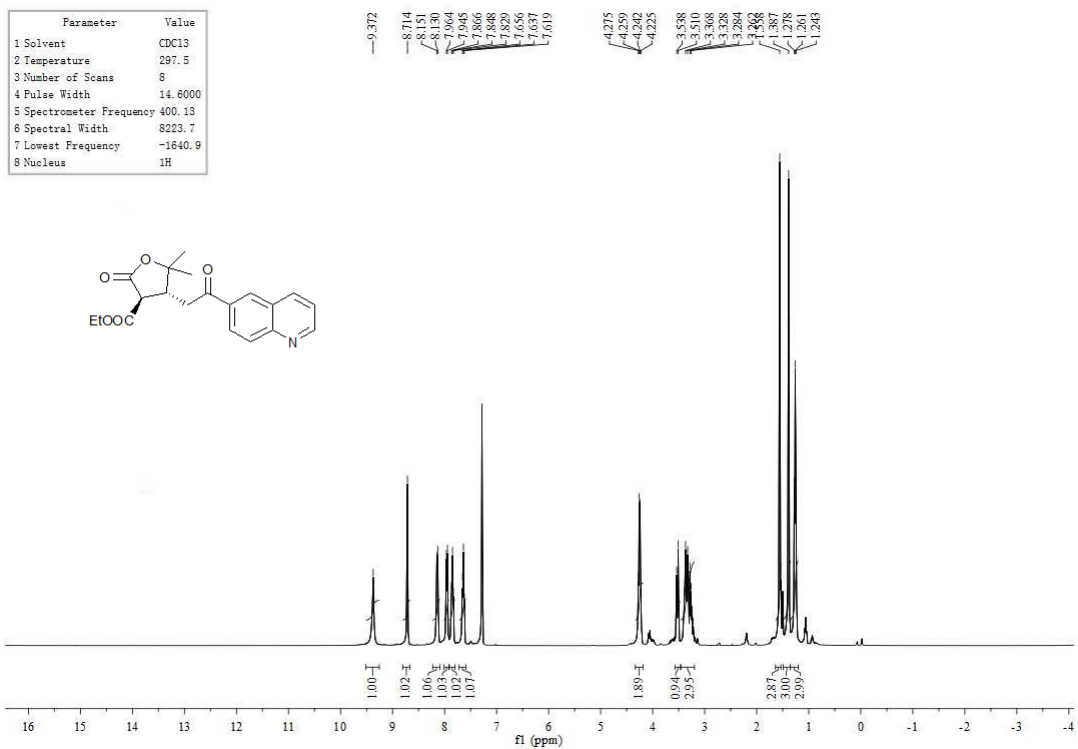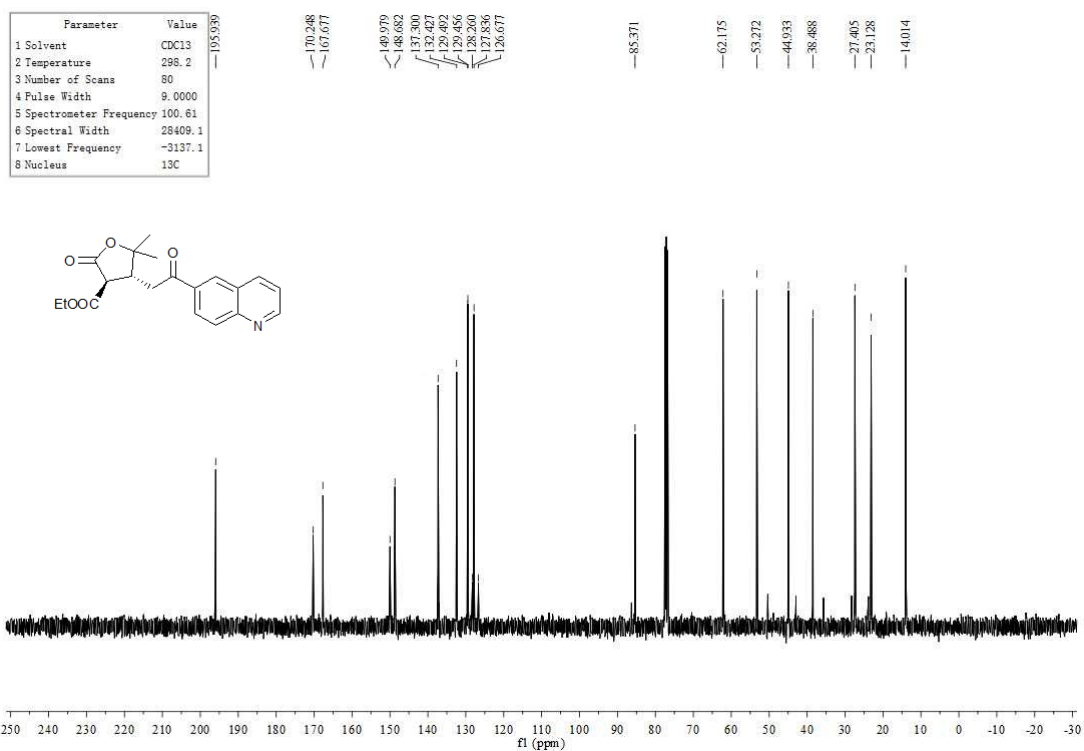

### $^1\text{H}$ NMR and $^{13}\text{C}$ NMR spectra of 3u

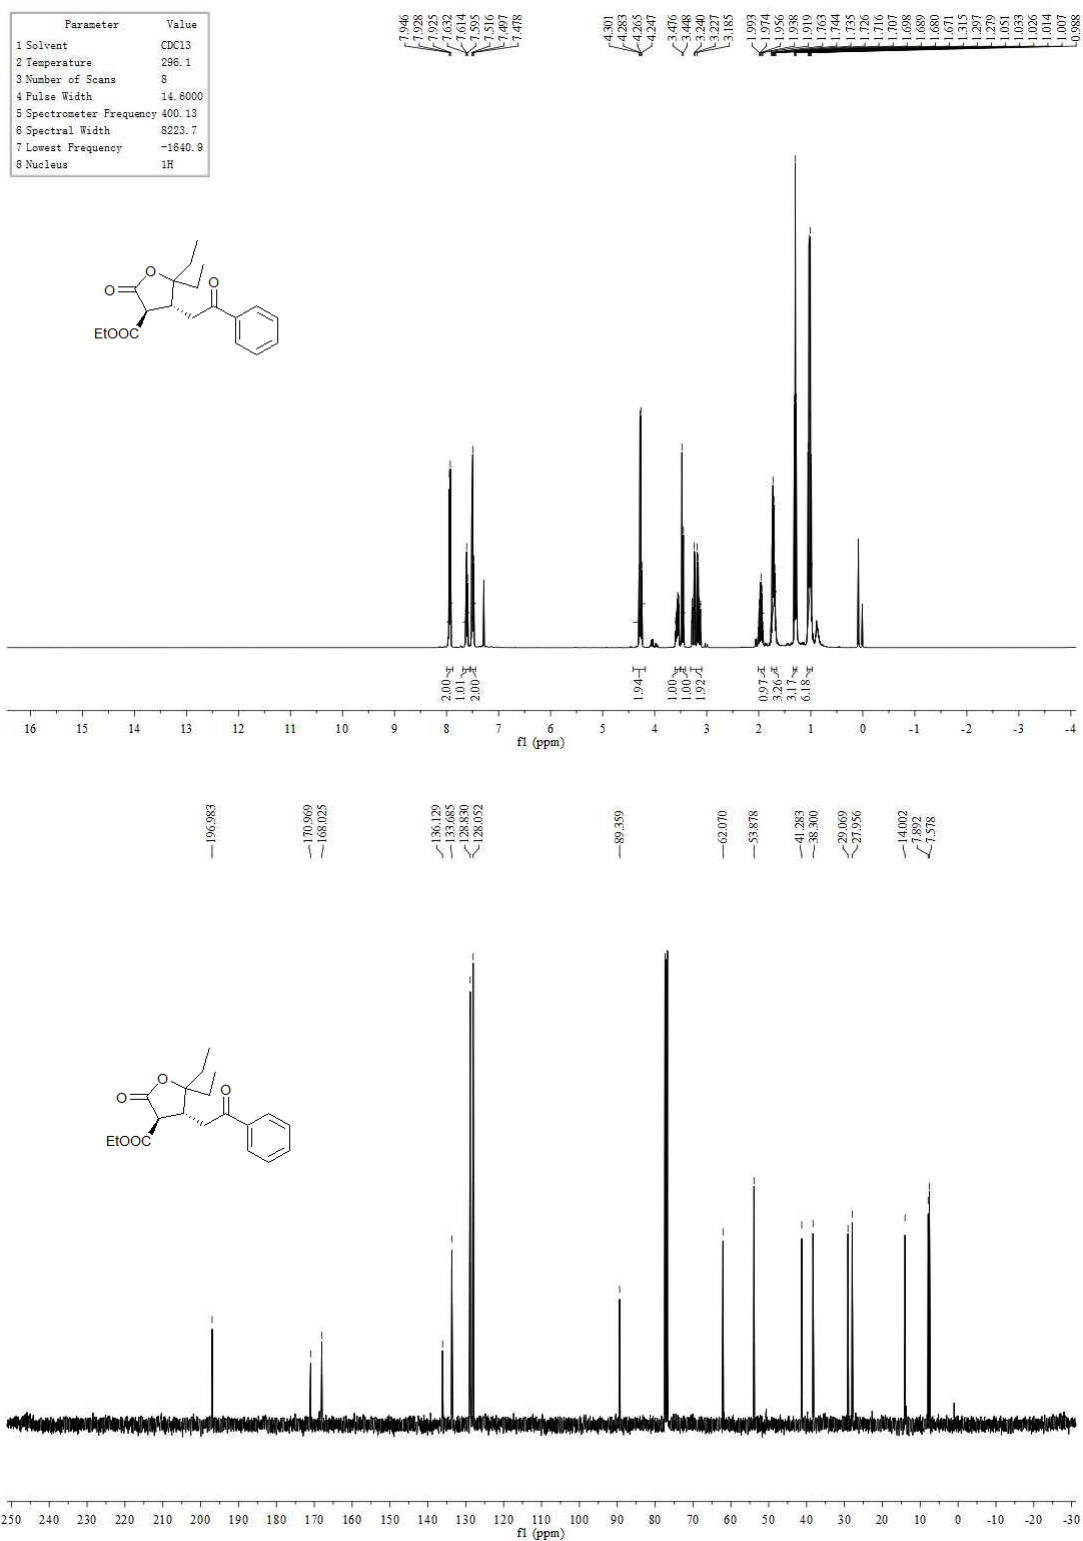

### $^1\text{H}$ NMR and $^{13}\text{C}$ NMR spectra of 3v

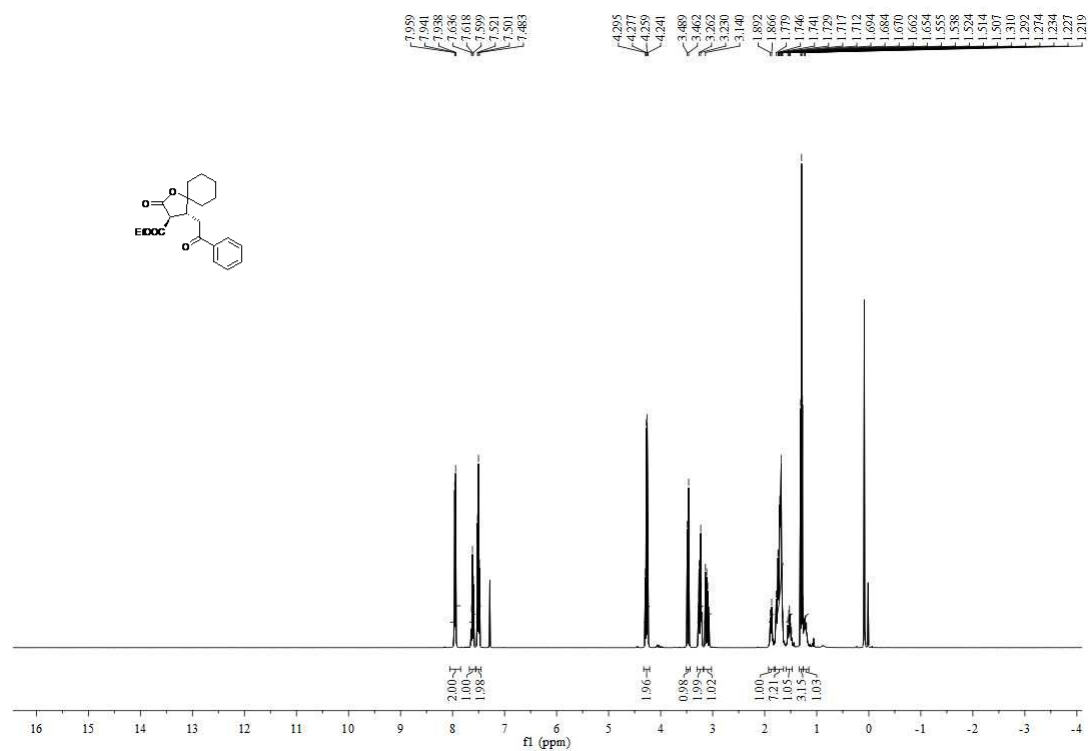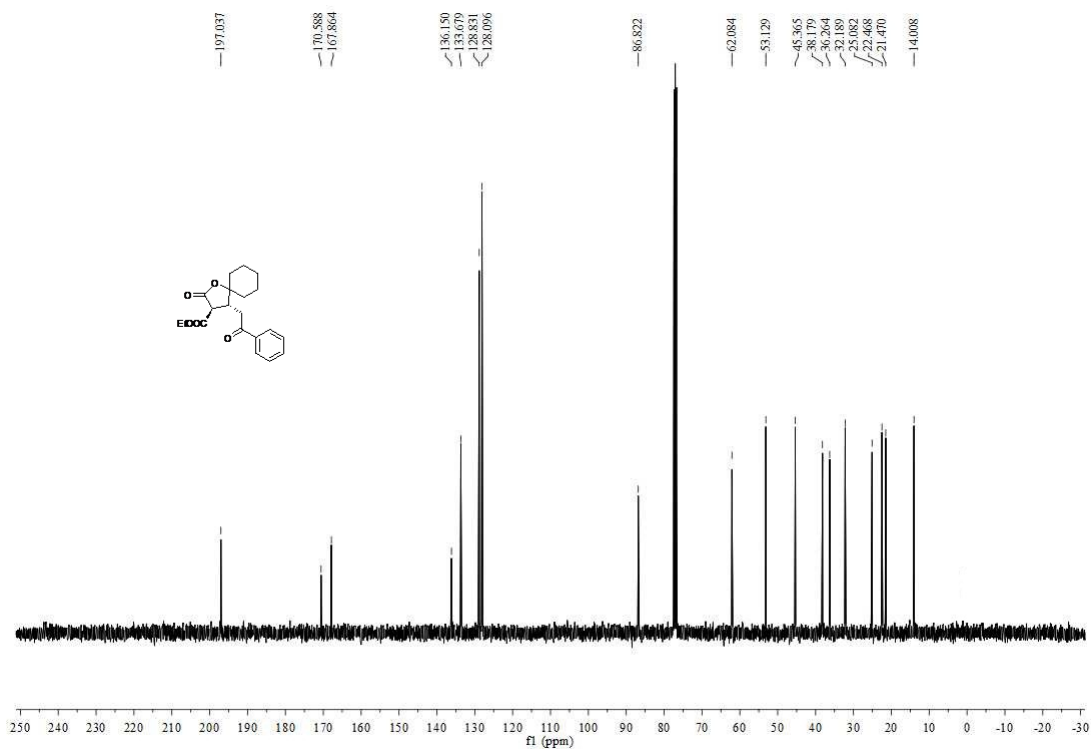

## HPLC analysis for compounds 3a-3v

### HPLC analysis for compounds 3a

Data File C:\HPCHEM\1\DATA\WW\11112430.D

Sample Name: none-rac(70:30)

=====  
Injection Date : 11/29/2011 12:59:50 PM  
Sample Name : none-rac(70:30) Location : -  
Acq. Operator : WW  
Acq. Method : C:\HPCHEM\1\METHODS\LYH.M  
Last changed : 11/29/2011 11:18:56 AM by WW  
(modified after loading)  
Analysis Method : C:\HPCHEM\1\METHODS\LYH.M  
Last changed : 11/30/2011 2:00:06 PM by WW  
(modified after loading)

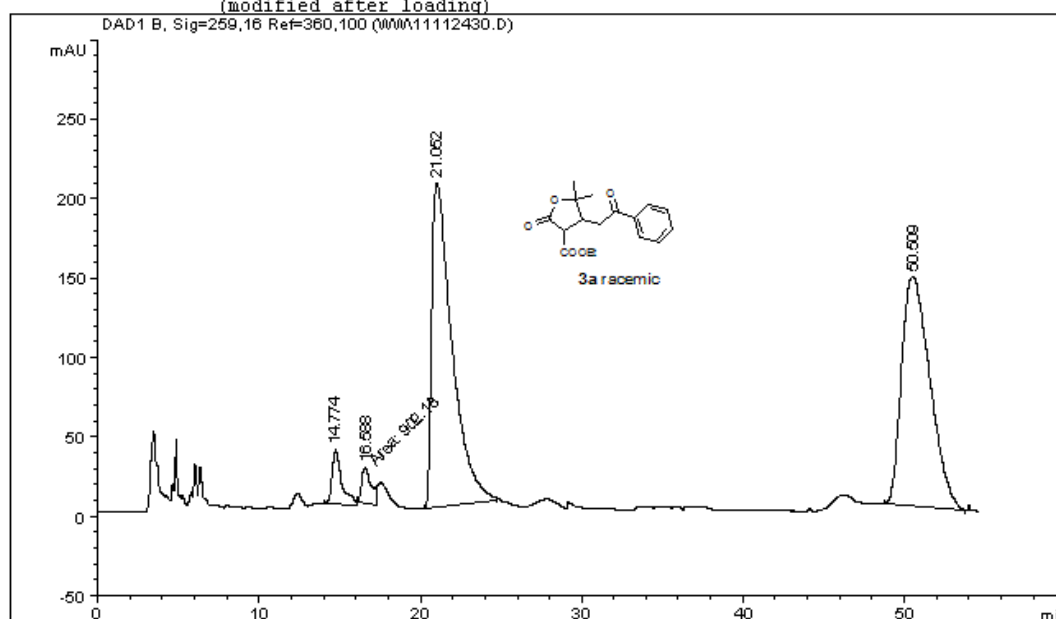

=====  
Area Percent Report  
=====

Sorted By : Signal  
Multiplier : 1.0000  
Dilution : 1.0000  
Sample Amount : 10.00000 [ng/ul] (not used in calc.)

Signal 1: DAD1 B, Sig=259,16 Ref=360,100

| Peak # | RetTime [min] | Type | Width [min] | Area [mAU*s] | Height [mAU] | Area %  |
|--------|---------------|------|-------------|--------------|--------------|---------|
| 1      | 14.774        | BB   | 0.6180      | 1467.91064   | 34.24862     | 3.8719  |
| 2      | 16.588        | MM   | 0.6790      | 902.18018    | 22.14597     | 2.3797  |
| 3      | 21.052        | BB   | 1.2071      | 1.78398e4    | 203.83644    | 47.0563 |
| 4      | 50.509        | BB   | 1.4768      | 1.77017e4    | 144.33984    | 46.6921 |

Totals : 3.79117e4 404.57087

Results obtained with enhanced integrator!

=====  
\*\*\* End of Report \*\*\*

Data File C:\HPCHEM\1\DATA\WW\11112431.D

Sample Name: none-ee(70:30)

```

=====
Injection Date : 11/29/2011 1:56:49 PM
Sample Name   : none-ee(70:30)           Location  : -
Acq. Operator : WW
Acq. Method   : C:\HPCHEM\1\METHODS\LYH.M
Last changed  : 11/29/2011 1:55:44 PM by WW
                (modified after loading)
Analysis Method : C:\HPCHEM\1\METHODS\LYH.M
Last changed  : 11/30/2011 1:58:37 PM by WW
                (modified after loading)
    
```

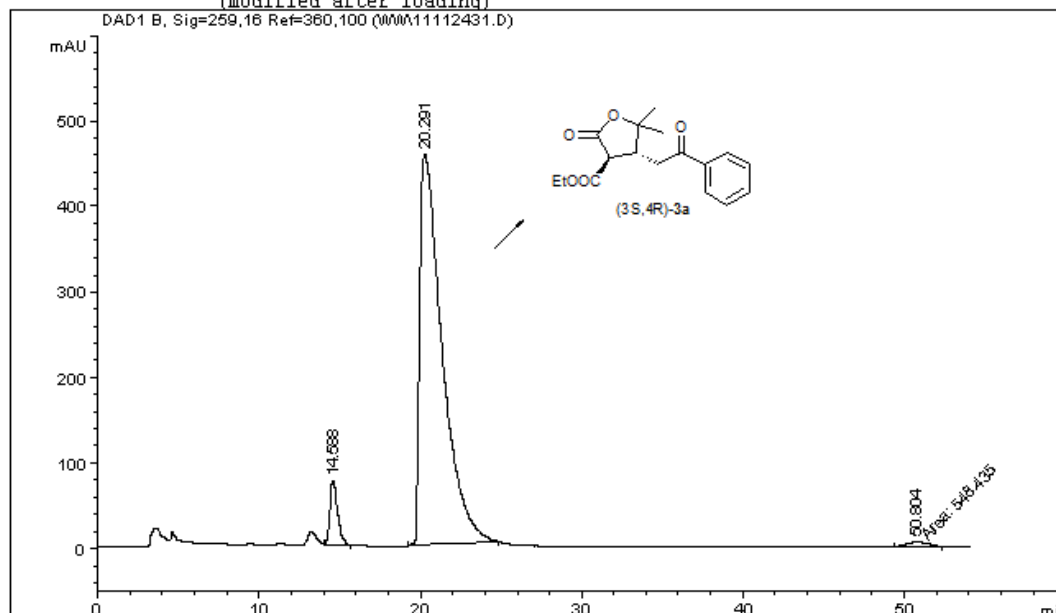

Area Percent Report

```

=====
Sorted By      : Signal
Multiplier    : 1.0000
Dilution      : 1.0000
Sample Amount  : 10.00000 [ng/ul] (not used in calc.)
    
```

Signal 1: DAD1 B, Sig=259,16 Ref=360,100

| Peak # | RetTime [min] | Type | Width [min] | Area [mAU*s] | Height [mAU] | Area %  |
|--------|---------------|------|-------------|--------------|--------------|---------|
| 1      | 14.588        | VB   | 0.5200      | 2561.09106   | 74.70151     | 5.4150  |
| 2      | 20.291        | BB   | 1.2517      | 4.41866e4    | 457.13153    | 93.4254 |
| 3      | 50.804        | MM   | 1.7691      | 548.43475    | 5.16669      | 1.1596  |

Totals : 4.72961e4 536.99973

Results obtained with enhanced integrator!

\*\*\* End of Report \*\*\*

### HPLC analysis for compounds **3b**

Data File C:\HPCHEM\1\DATA\WW\11101700.D

Sample Name: 4-F-rac

```
=====
Injection Date   : 10/17/2011 4:27:20 PM
Sample Name     : 4-F-rac
Acq. Operator   : WW
Acq. Method     : C:\HPCHEM\1\METHODS\LYH.M
Last changed    : 10/17/2011 4:02:26 PM by WW
                  (modified after loading)
Analysis Method : C:\HPCHEM\1\METHODS\LYH.M
Last changed    : 10/17/2011 6:17:41 PM by WW
                  (modified after loading)
=====
```

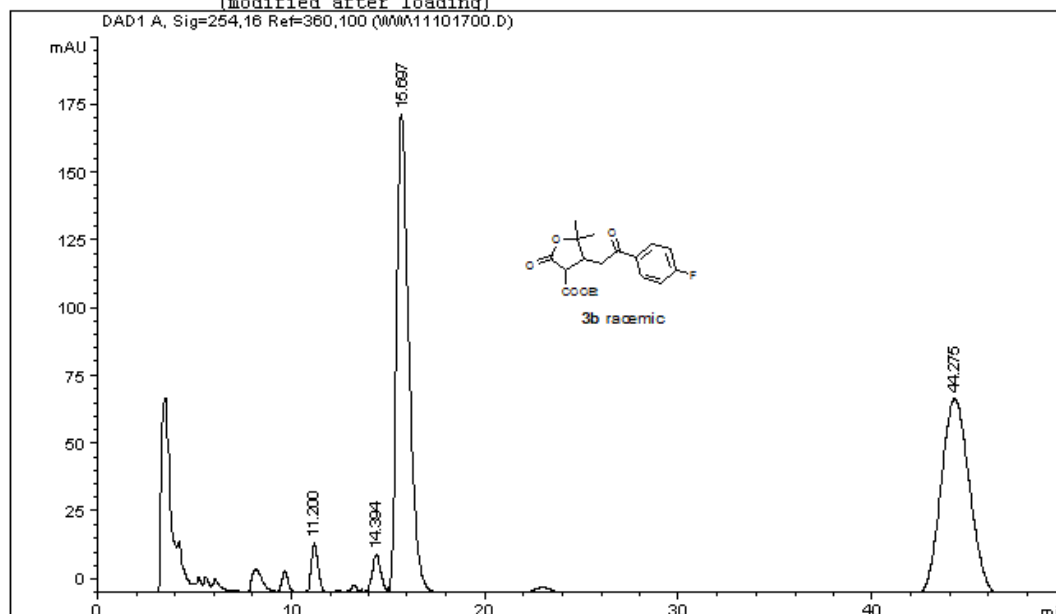

=====  
Area Percent Report  
=====

```
Sorted By       : Signal
Multiplier      : 1.0000
Dilution        : 1.0000
Sample Amount   : 1.00000 [ng/ul] (not used in calc.)
```

Signal 1: DAD1 A, Sig=254,16 Ref=360,100

| Peak # | RetTime [min] | Type | Width [min] | Area [mAU*s] | Height [mAU] | Area %  |
|--------|---------------|------|-------------|--------------|--------------|---------|
| 1      | 11.200        | BB   | 0.3674      | 458.87543    | 18.62979     | 2.8383  |
| 2      | 14.394        | VV   | 0.4627      | 425.29395    | 13.67999     | 2.6306  |
| 3      | 15.697        | VB   | 0.6641      | 7727.02881   | 176.02527    | 47.7940 |
| 4      | 44.275        | BB   | 1.2185      | 7556.17871   | 73.06450     | 46.7372 |

Totals : 1.61674e4 281.39954

Results obtained with enhanced integrator!

=====  
\*\*\* End of Report \*\*\*

Data File C:\HPCHEM\1\DATA\WW\11101701.D

Sample Name: 4-F-ee

=====  
Injection Date : 10/17/2011 5:15:43 PM  
Sample Name : 4-F-ee Location : -  
Acq. Operator : WW  
Acq. Method : C:\HPCHEM\1\METHODS\LYH.M  
Last changed : 10/17/2011 4:02:26 PM by WW  
(modified after loading)  
Analysis Method : C:\HPCHEM\1\METHODS\LYH.M  
Last changed : 10/17/2011 6:21:46 PM by WW  
(modified after loading)  
=====

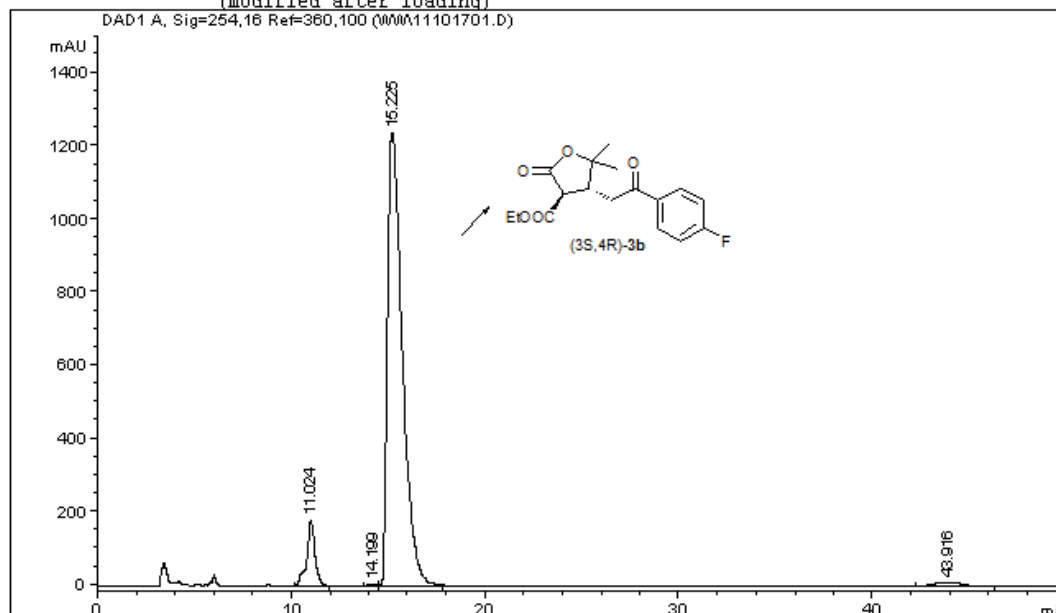

=====  
Area Percent Report  
=====

Sorted By : Signal  
Multiplier : 1.0000  
Dilution : 1.0000  
Sample Amount : 1.00000 [ng/ul] (not used in calc.)

Signal 1: DAD1 A, Sig=254,16 Ref=360,100

| Peak # | RetTime [min] | Type | Width [min] | Area [mAU*s] | Height [mAU] | Area %  |
|--------|---------------|------|-------------|--------------|--------------|---------|
| 1      | 11.024        | BB   | 0.4435      | 5432.77344   | 179.30092    | 7.4851  |
| 2      | 14.199        | BV   | 0.3471      | 119.56632    | 4.21304      | 0.1647  |
| 3      | 15.225        | VB   | 0.7846      | 6.59409e4    | 1235.70032   | 90.8507 |
| 4      | 43.916        | BB   | 1.1840      | 1088.36377   | 10.92758     | 1.4995  |

Totals : 7.25816e4 1430.14186

Results obtained with enhanced integrator!

=====  
\*\*\* End of Report \*\*\*  
=====

Instrument 1 10/17/2011 6:22:13 PM WW

Page 1 of 1

### HPLC analysis for compounds 3c

Data File C:\HPCHEM\1\DATA\WW\12043004.D

Sample Name: 4-cl-rac

```
=====
Injection Date : 4/30/2012 8:53:33 PM
Sample Name    : 4-cl-rac                Location : Vial 1
Acq. Operator  : WW
Acq. Method    : C:\HPCHEM\1\METHODS\LYH.M
Last changed   : 4/30/2012 4:36:12 PM by cdc
                (modified after loading)
Analysis Method : C:\HPCHEM\1\METHODS\LYH.M
Last changed   : 5/1/2012 4:44:49 PM by WW
                (modified after loading)
=====
```

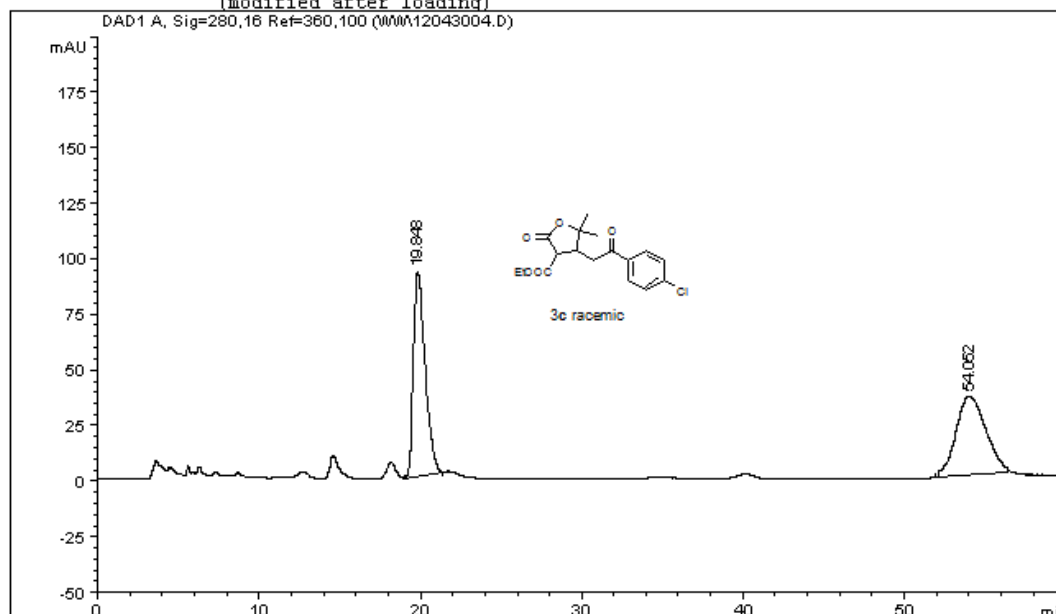

=====  
Area Percent Report  
=====

```
Sorted By      : Signal
Multiplier     : 1.0000
Dilution       : 1.0000
Sample Amount   : 1.00000 [ng/ul] (not used in calc.)
```

Signal 1: DAD1 A, Sig=280,16 Ref=360,100

| Peak # | RetTime [min] | Type | Width [min] | Area [mAU*s] | Height [mAU] | Area %  |
|--------|---------------|------|-------------|--------------|--------------|---------|
| 1      | 19.848        | VB   | 0.7673      | 4659.41650   | 91.61997     | 50.6794 |
| 2      | 54.052        | BV   | 1.5172      | 4534.49121   | 35.23917     | 49.3206 |

Totals : 9193.90771 126.85915

Results obtained with enhanced integrator!

=====  
\*\*\* End of Report \*\*\*



Data File C:\HPCHEM\1\DATA\WW\12043003.D

Sample Name: 4-cl-70

```
=====
Injection Date : 4/30/2012 7:52:23 PM
Sample Name    : 4-cl-70                      Location : Vial 1
Acq. Operator  : WW
Acq. Method    : C:\HPCHEM\1\METHODS\LYH.M
Last changed   : 4/30/2012 4:36:12 PM by cdc
                (modified after loading)
Analysis Method : C:\HPCHEM\1\METHODS\LYH.M
Last changed   : 5/1/2012 4:43:32 PM by WW
                (modified after loading)
=====
```

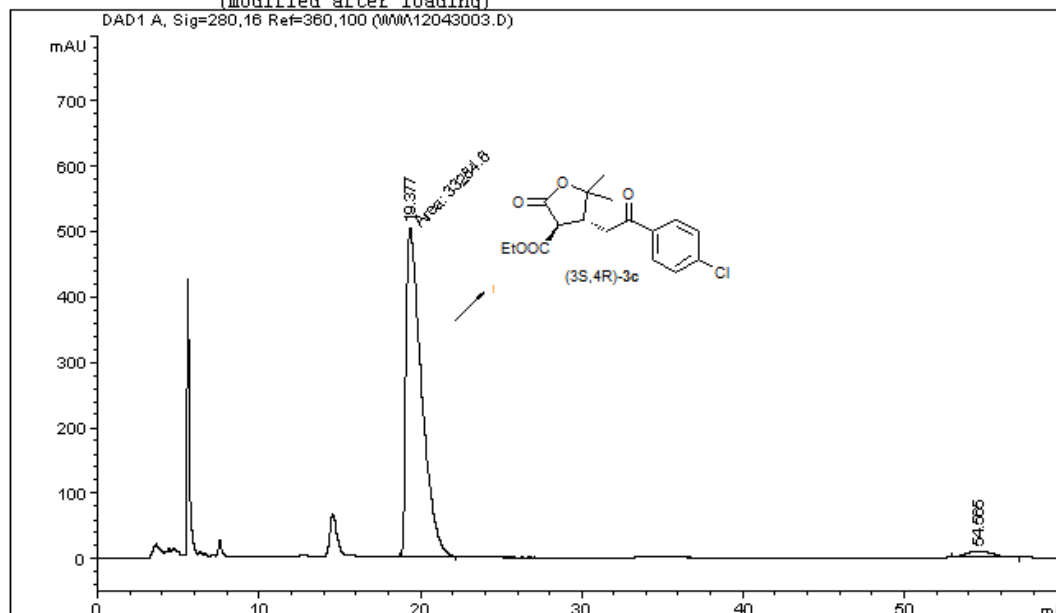

=====  
Area Percent Report  
=====

```
Sorted By      : Signal
Multiplier     : 1.0000
Dilution       : 1.0000
Sample Amount  : 1.00000 [ng/ul] (not used in calc.)
```

Signal 1: DAD1 A, Sig=280,16 Ref=360,100

| Peak # | RetTime [min] | Type | Width [min] | Area [mAU*s] | Height [mAU] | Area %  |
|--------|---------------|------|-------------|--------------|--------------|---------|
| 1      | 19.377        | MM   | 1.1085      | 3.32846e4    | 500.44357    | 96.7471 |
| 2      | 54.565        | BB   | 1.3677      | 1119.10559   | 9.63030      | 3.2529  |

Totals : 3.44037e4 510.07387

Results obtained with enhanced integrator!

=====  
\*\*\* End of Report \*\*\*

### HPLC analysis for compounds **3d**

Data File C:\HPCHEM\1\DATA\WW\12043002.D

Sample Name: 4-br-rac

```
=====
Injection Date   : 4/30/2012 6:48:26 PM
Sample Name     : 4-br-rac                Location  : Vial 1
Acq. Operator  : WW
Acq. Method    : C:\HPCHEM\1\METHODS\LYH.M
Last changed   : 4/30/2012 4:36:12 PM by cdc
                (modified after loading)
Analysis Method: C:\HPCHEM\1\METHODS\LYH.M
Last changed   : 5/1/2012 4:41:52 PM by WW
                (modified after loading)
=====
```

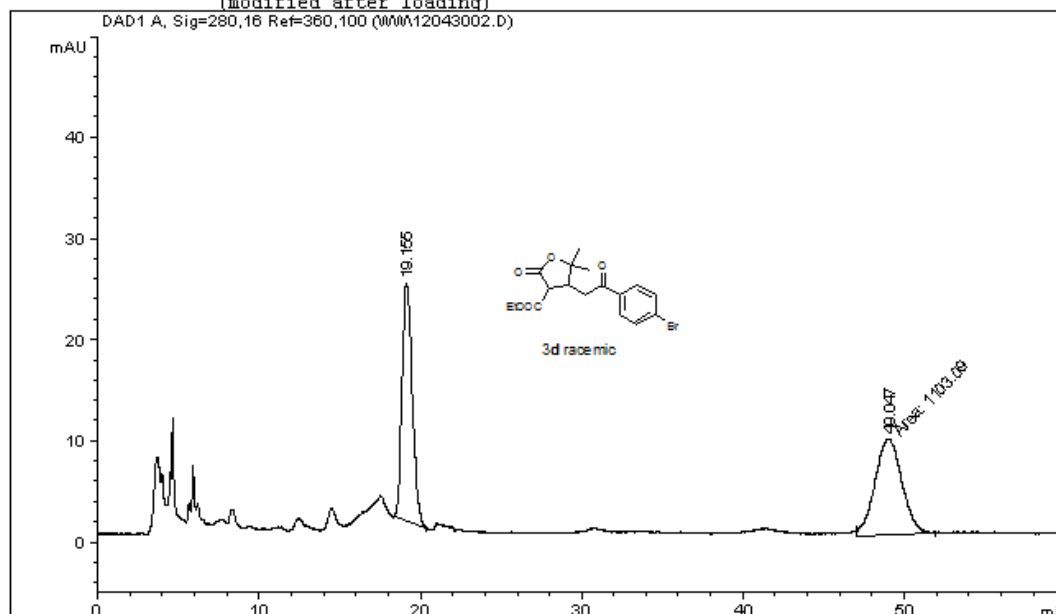

#### Area Percent Report

```
Sorted By      : Signal
Multiplier     : 1.0000
Dilution      : 1.0000
Sample Amount  : 1.00000 [ng/ul] (not used in calc.)
```

Signal 1: DAD1 A, Sig=280,16 Ref=360,100

| Peak # | RetTime [min] | Type | Width [min] | Area [mAU*s] | Height [mAU] | Area %  |
|--------|---------------|------|-------------|--------------|--------------|---------|
| 1      | 19.155        | BB   | 0.6063      | 1033.60315   | 23.53965     | 48.3739 |
| 2      | 49.047        | MM   | 1.9359      | 1103.09180   | 9.49661      | 51.6261 |

Totals : 2136.69495 33.03625

Results obtained with enhanced integrator!

\*\*\* End of Report \*\*\*

Data File C:\HPCHEM\1\DATA\WW\12043001.D

Sample Name: 4-br-70

=====  
Injection Date : 4/30/2012 5:47:21 PM  
Sample Name : 4-br-70 Location : Vial 1  
Acq. Operator : WW  
Acq. Method : C:\HPCHEM\1\METHODS\LYH.M  
Last changed : 4/30/2012 4:36:12 PM by cdc  
(modified after loading)  
Analysis Method : C:\HPCHEM\1\METHODS\LYH.M  
Last changed : 5/1/2012 4:39:31 PM by WW  
(modified after loading)  
=====

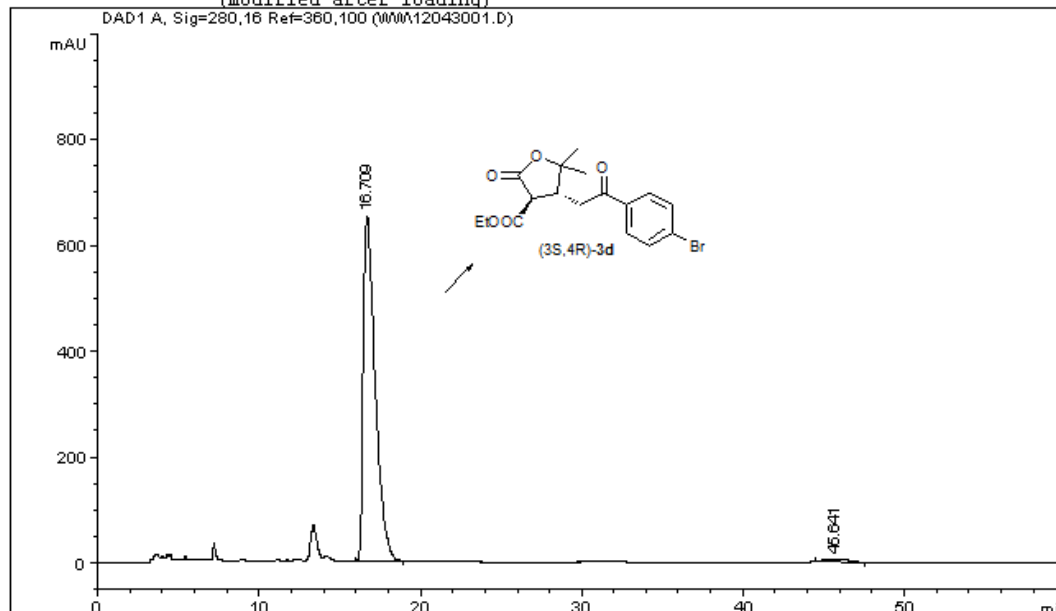

=====  
Area Percent Report  
=====

Sorted By : Signal  
Multiplier : 1.0000  
Dilution : 1.0000  
Sample Amount : 1.00000 [ng/ul] (not used in calc.)

Signal 1: DAD1 A, Sig=280,16 Ref=360,100

| Peak # | RetTime [min] | Type | Width [min] | Area [mAU*s] | Height [mAU] | Area %  |
|--------|---------------|------|-------------|--------------|--------------|---------|
| 1      | 16.709        | PB   | 0.7717      | 3.33154e4    | 650.27979    | 98.4888 |
| 2      | 45.641        | BB   | 1.0766      | 511.17108    | 5.62299      | 1.5112  |

Totals : 3.38266e4 655.90278

Results obtained with enhanced integrator!

=====  
\*\*\* End of Report \*\*\*  
=====

### HPLC analysis for compounds 3e

Data File C:\HPCHEM\1\DATA\WW\11101709.D

Sample Name: 4-no2-rac

```
=====
Injection Date   : 10/18/2011 1:20:49 AM
Sample Name     : 4-no2-rac                Location   : -
Acq. Operator   : WW
Acq. Method     : C:\HPCHEM\1\METHODS\LYH.M
Last changed    : 10/18/2011 1:12:52 AM by WW
                  (modified after loading)
Analysis Method : C:\HPCHEM\1\METHODS\LYH.M
Last changed    : 10/18/2011 4:32:16 AM by WW
                  (modified after loading)
=====
```

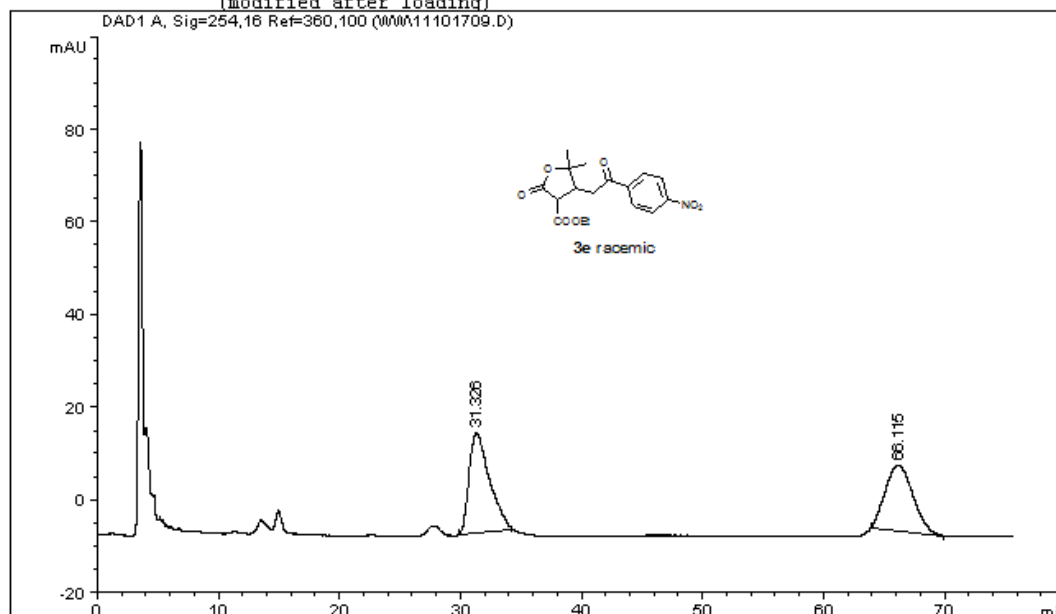

=====  
Area Percent Report  
=====

```
Sorted By      : Signal
Multiplier     : 1.0000
Dilution       : 1.0000
Sample Amount  : 1.00000 [ng/ul] (not used in calc.)
```

Signal 1: DAD1 A, Sig=254,16 Ref=360,100

| Peak # | RetTime [min] | Type | Width [min] | Area [mAU*s] | Height [mAU] | Area %  |
|--------|---------------|------|-------------|--------------|--------------|---------|
| 1      | 31.326        | BB   | 1.3834      | 2518.93579   | 21.49086     | 52.8154 |
| 2      | 66.115        | BB   | 1.8626      | 2250.38818   | 14.14095     | 47.1846 |

Totals : 4769.32397 35.63181

Results obtained with enhanced integrator!

=====  
\*\*\* End of Report \*\*\*

Data File C:\HPCHEM\1\DATA\WW\11101710.D

Sample Name: 4-no2-ee

=====  
Injection Date : 10/18/2011 2:39:15 AM  
Sample Name : 4-no2-ee Location : -  
Acq. Operator : WW  
Acq. Method : C:\HPCHEM\1\METHODS\LYH.M  
Last changed : 10/18/2011 2:39:06 AM by WW  
(modified after loading)  
Analysis Method : C:\HPCHEM\1\METHODS\LYH.M  
Last changed : 10/18/2011 4:34:50 AM by WW  
(modified after loading)  
=====

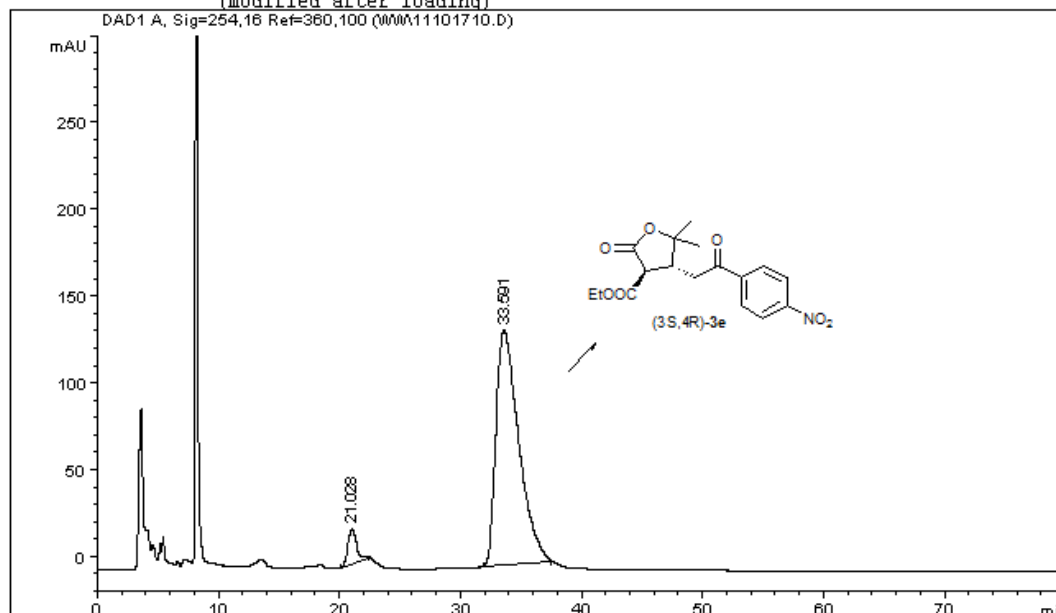

=====  
Area Percent Report  
=====

Sorted By : Signal  
Multiplier : 1.0000  
Dilution : 1.0000  
Sample Amount : 1.00000 [ng/ul] (not used in calc.)

Signal 1: DAD1 A, Sig=254,16 Ref=360,100

| Peak # | RetTime [min] | Type | Width [min] | Area [mAU*s] | Height [mAU] | Area %  |
|--------|---------------|------|-------------|--------------|--------------|---------|
| 1      | 21.028        | PB   | 0.6949      | 1019.05707   | 20.25629     | 5.4504  |
| 2      | 33.591        | BB   | 1.7628      | 1.76777e4    | 134.90565    | 94.5496 |

Totals : 1.86968e4 155.16195

Results obtained with enhanced integrator!

=====  
\*\*\* End of Report \*\*\*

Instrument 1 10/18/2011 4:35:18 AM WW

Page 1 of 1

### HPLC analysis for compounds 3f

Data File C:\HPCHEM\1\DATA\WW\11112432.D

Sample Name: 4-Me-rac(80:20)

```
=====
Injection Date   : 11/29/2011 3:25:56 PM
Sample Name     : 4-Me-rac(80:20)           Location :   -
Acq. Operator   : WW
Acq. Method     : C:\HPCHEM\1\METHODS\LYH.M
Last changed    : 11/29/2011 2:51:16 PM by WW
                  (modified after loading)
Analysis Method : C:\HPCHEM\1\METHODS\LYH.M
Last changed    : 11/30/2011 1:49:58 PM by WW
                  (modified after loading)
=====
```

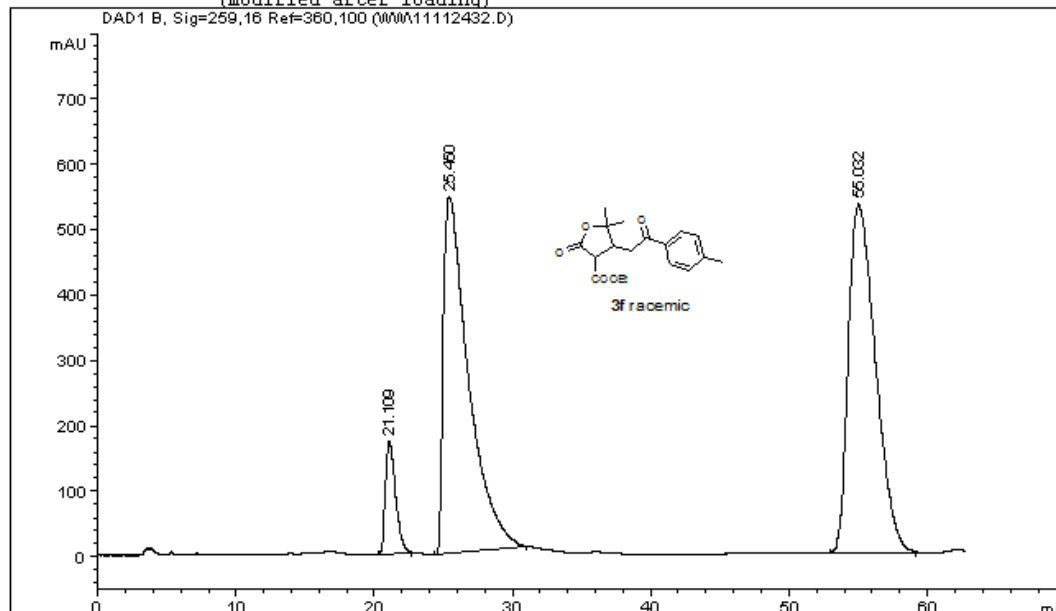

=====  
Area Percent Report  
=====

```
Sorted By      : Signal
Multiplier     : 1.0000
Dilution       : 1.0000
Sample Amount  : 10.00000 [ng/ul] (not used in calc.)
```

Signal 1: DAD1 B, Sig=259,16 Ref=360,100

| Peak # | RetTime [min] | Type | Width [min] | Area [mAU*s] | Height [mAU] | Area %  |
|--------|---------------|------|-------------|--------------|--------------|---------|
| 1      | 21.109        | BB   | 0.7498      | 8714.71875   | 172.97012    | 5.8076  |
| 2      | 25.450        | PB   | 1.7214      | 6.87284e4    | 544.22089    | 45.8011 |
| 3      | 55.032        | BB   | 1.6536      | 7.26153e4    | 532.94543    | 48.3914 |

Totals : 1.50058e5 1250.13644

Results obtained with enhanced integrator!

=====  
\*\*\* End of Report \*\*\*

Data File C:\HPCHEM\1\DATA\WW\11112433.D

Sample Name: 4-Me-ee(80:20)

=====  
Injection Date : 11/29/2011 4:30:29 PM  
Sample Name : 4-Me-ee(80:20) Location : -  
Acq. Operator : WW  
Acq. Method : C:\HPCHEM\1\METHODS\LYH.M  
Last changed : 11/29/2011 2:51:16 PM by WW  
(modified after loading)  
Analysis Method : C:\HPCHEM\1\METHODS\LYH.M  
Last changed : 11/30/2011 1:51:40 PM by WW  
(modified after loading)  
=====

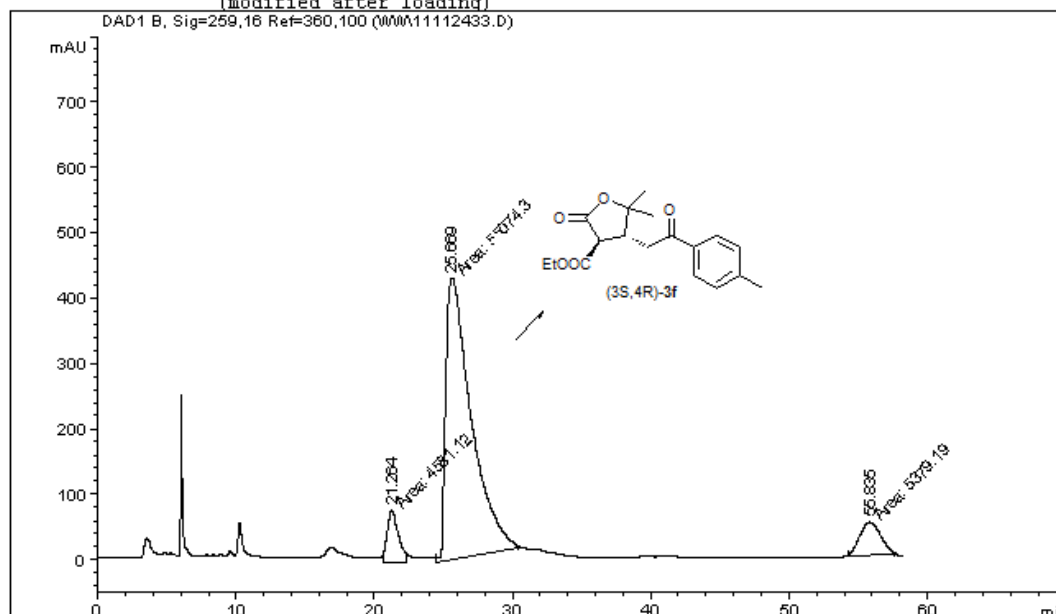

=====  
Area Percent Report  
=====

Sorted By : Signal  
Multiplier : 1.0000  
Dilution : 1.0000  
Sample Amount : 10.00000 [ng/ul] (not used in calc.)

Signal 1: DAD1 B, Sig=259,16 Ref=360,100

| Peak # | RetTime [min] | Type | Width [min] | Area [mAU*s] | Height [mAU] | Area %  |
|--------|---------------|------|-------------|--------------|--------------|---------|
| 1      | 21.264        | MM   | 0.9638      | 4581.12012   | 79.22063     | 7.0441  |
| 2      | 25.669        | MM   | 2.1316      | 5.50743e4    | 430.62424    | 84.6846 |
| 3      | 55.835        | MM   | 1.7756      | 5379.19385   | 50.49243     | 8.2713  |

Totals : 6.50346e4 560.33730

Results obtained with enhanced integrator!

=====  
\*\*\* End of Report \*\*\*  
=====

### HPLC analysis for compounds **3g**

Data File C:\HPCHEM\1\DATA\WW\12041302.D

Sample Name: 3cl-rac

```
=====
Injection Date : 4/13/2012 11:49:05 AM
Sample Name    : 3cl-rac                      Location : Vial 1
Acq. Operator  : WW
Acq. Method    : C:\HPCHEM\1\METHODS\LYH.M
Last changed   : 4/13/2012 10:48:12 AM by WW
                (modified after loading)
Analysis Method : C:\HPCHEM\1\METHODS\LYH.M
Last changed   : 4/13/2012 1:48:58 PM by WW
                (modified after loading)
=====
```

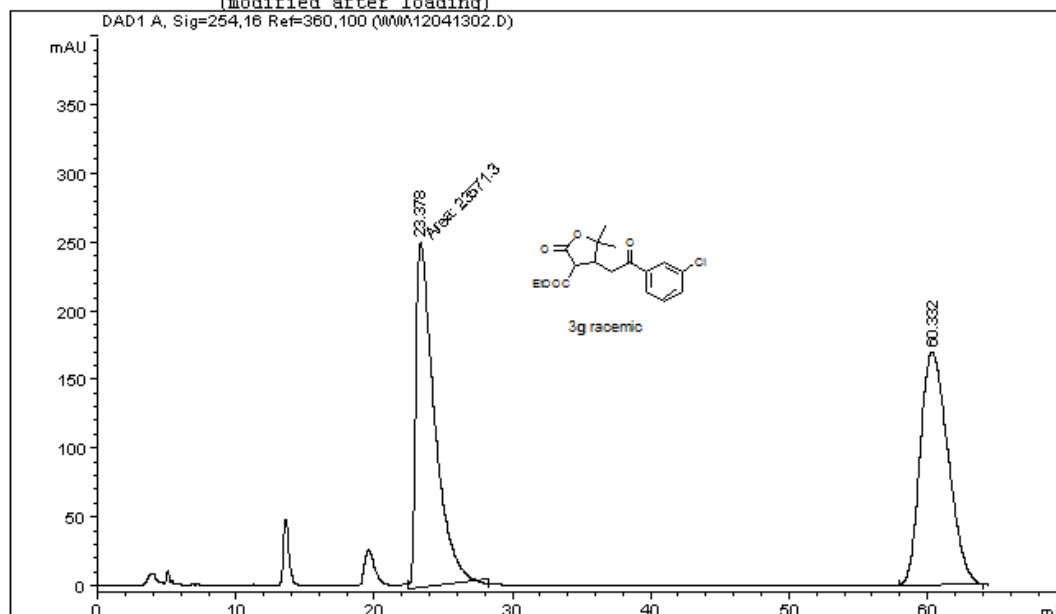

#### Area Percent Report

```
Sorted By      : Signal
Multiplier     : 1.0000
Dilution       : 1.0000
Sample Amount  : 1.00000 [ng/ul] (not used in calc.)
```

Signal 1: DAD1 A, Sig=254,16 Ref=360,100

| Peak # | RetTime [min] | Type | Width [min] | Area [mAU*s] | Height [mAU] | Area %  |
|--------|---------------|------|-------------|--------------|--------------|---------|
| 1      | 23.378        | MM   | 1.5597      | 2.35713e4    | 251.87418    | 49.7944 |
| 2      | 60.332        | BB   | 1.6502      | 2.37659e4    | 169.24831    | 50.2056 |

Totals : 4.73372e4 421.12248

Results obtained with enhanced integrator!

\*\*\* End of Report \*\*\*



Data File C:\HPCHEM\1\DATA\WW\12041303.D

Sample Name: 3c1-70

=====  
Injection Date : 4/13/2012 12:54:33 PM  
Sample Name : 3c1-70 Location : Vial 1  
Acq. Operator : WW  
Acq. Method : C:\HPCHEM\1\METHODS\LYH.M  
Last changed : 4/13/2012 10:48:12 AM by WW  
(modified after loading)  
Analysis Method : C:\HPCHEM\1\METHODS\LYH.M  
Last changed : 4/13/2012 2:00:54 PM by WW  
(modified after loading)  
=====

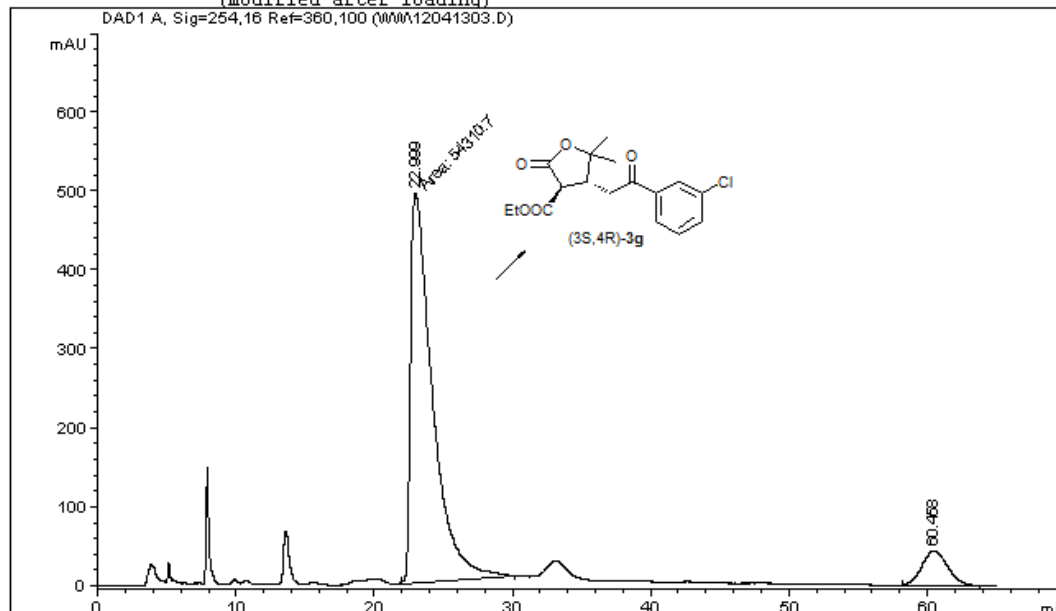

=====  
Area Percent Report  
=====

Sorted By : Signal  
Multiplier : 1.0000  
Dilution : 1.0000  
Sample Amount : 1.00000 [ng/ul] (not used in calc.)

Signal 1: DAD1 A, Sig=254,16 Ref=360,100

| Peak # | RetTime [min] | Type | Width [min] | Area [mAU*s] | Height [mAU] | Area %  |
|--------|---------------|------|-------------|--------------|--------------|---------|
| 1      | 22.999        | MM   | 1.8315      | 5.43107e4    | 494.22766    | 90.8403 |
| 2      | 60.458        | BB   | 1.4962      | 5476.33740   | 43.04813     | 9.1597  |

Totals : 5.97871e4 537.27579

Results obtained with enhanced integrator!

=====  
\*\*\* End of Report \*\*\*  
=====

Instrument 1 4/13/2012 2:00:59 PM WW

Page 1 of 1

### HPLC analysis for compounds 3h

Data File C:\HPCHEM\1\DATA\WW\11112414.D

Sample Name: 3-N02-rac

```
=====
Injection Date   : 11/27/2011 12:43:16 PM
Sample Name     : 3-N02-rac                Location   : -
Acq. Operator   : WW
Acq. Method     : C:\HPCHEM\1\METHODS\LYH.M
Last changed    : 11/27/2011 10:45:36 AM by WW
                  (modified after loading)
Analysis Method : C:\HPCHEM\1\METHODS\LYH.M
Last changed    : 11/27/2011 2:42:29 PM by WW
                  (modified after loading)
=====
```

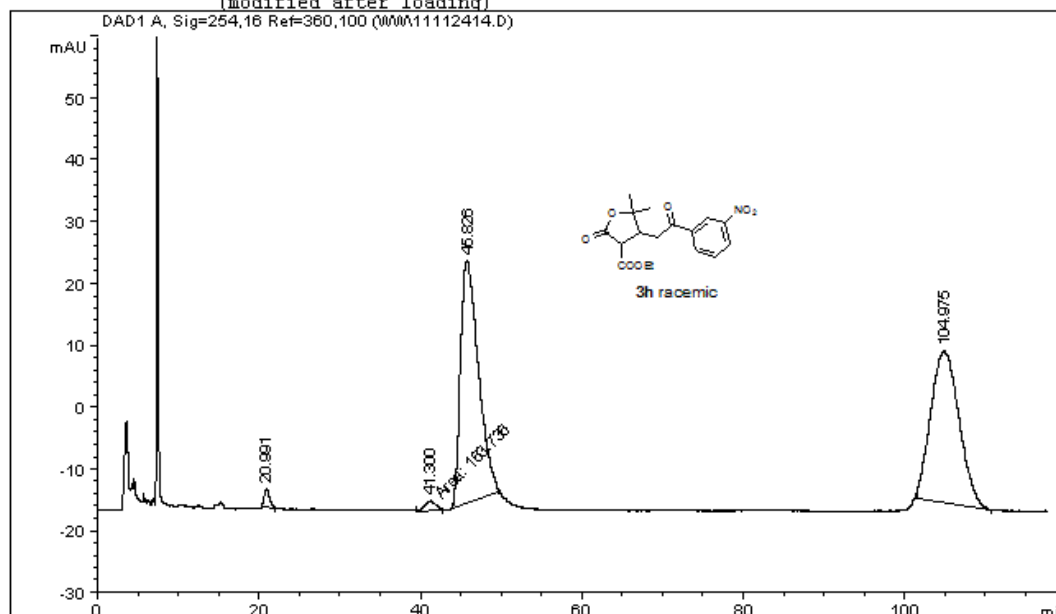

=====  
Area Percent Report  
=====

```
Sorted By       : Signal
Multiplier      : 1.0000
Dilution        : 1.0000
Sample Amount   : 10.00000 [ng/ul] (not used in calc.)
```

Signal 1: DAD1 A, Sig=254,16 Ref=360,100

| Peak # | RetTime [min] | Type | Width [min] | Area [mAU*s] | Height [mAU] | Area %  |
|--------|---------------|------|-------------|--------------|--------------|---------|
| 1      | 20.991        | BB   | 0.5220      | 132.35056    | 3.05149      | 1.0724  |
| 2      | 41.300        | MM   | 1.7333      | 163.73595    | 1.57440      | 1.3267  |
| 3      | 45.826        | BB   | 1.8133      | 6018.20459   | 39.10974     | 48.7643 |
| 4      | 104.975       | BB   | 2.8750      | 6027.12012   | 24.54311     | 48.8366 |

Totals : 1.23414e4 68.27874

Results obtained with enhanced integrator!

=====  
\*\*\* End of Report \*\*\*

Data File C:\HPCHEM\1\DATA\WW\11112413.D

Sample Name: 3-N02-ee

```

=====
Injection Date : 11/27/2011 10:47:23 AM
Sample Name    : 3-N02-ee                Location   : -
Acq. Operator  : WW
Acq. Method    : C:\HPCHEM\1\METHODS\LYH.M
Last changed   : 11/27/2011 10:45:36 AM by WW
                (modified after loading)
Analysis Method : C:\HPCHEM\1\METHODS\LYH.M
Last changed   : 11/27/2011 1:47:09 PM by WW
                (modified after loading)
    
```

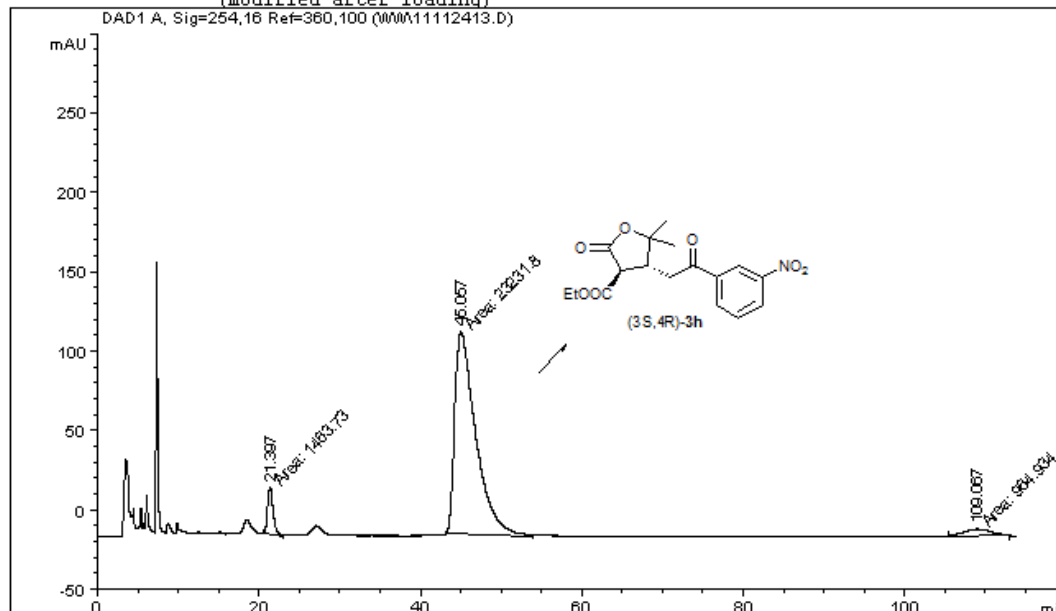

Area Percent Report

```

=====
Sorted By      : Signal
Multiplier     : 1.0000
Dilution       : 1.0000
Sample Amount  : 10.00000 [ng/ul] (not used in calc.)
    
```

Signal 1: DAD1 A, Sig=254,16 Ref=360,100

| Peak # | RetTime [min] | Type | Width [min] | Area [mAU*s] | Height [mAU] | Area %  |
|--------|---------------|------|-------------|--------------|--------------|---------|
| 1      | 21.397        | MM   | 0.8219      | 1463.73401   | 29.68282     | 5.7042  |
| 2      | 45.057        | MM   | 3.0437      | 2.32318e4    | 127.21407    | 90.5354 |
| 3      | 109.067       | MM   | 3.9324      | 964.93359    | 4.08963      | 3.7604  |

Totals : 2.56604e4 160.98651

Results obtained with enhanced integrator!

\*\*\* End of Report \*\*\*

### HPLC analysis for compounds 3i

Data File C:\HPCHEM\1\DATA\WW\11112421.D

Sample Name: 3-ome-ee

=====  
Injection Date : 11/28/2011 2:20:40 PM  
Sample Name : 3-ome-ee Location : -  
Acq. Operator : WW  
Acq. Method : C:\HPCHEM\1\METHODS\LYH.M  
Last changed : 11/28/2011 2:19:09 PM by WW  
(modified after loading)  
Analysis Method : C:\HPCHEM\1\METHODS\LYH.M  
Last changed : 11/28/2011 4:12:31 PM by WW  
(modified after loading)  
=====

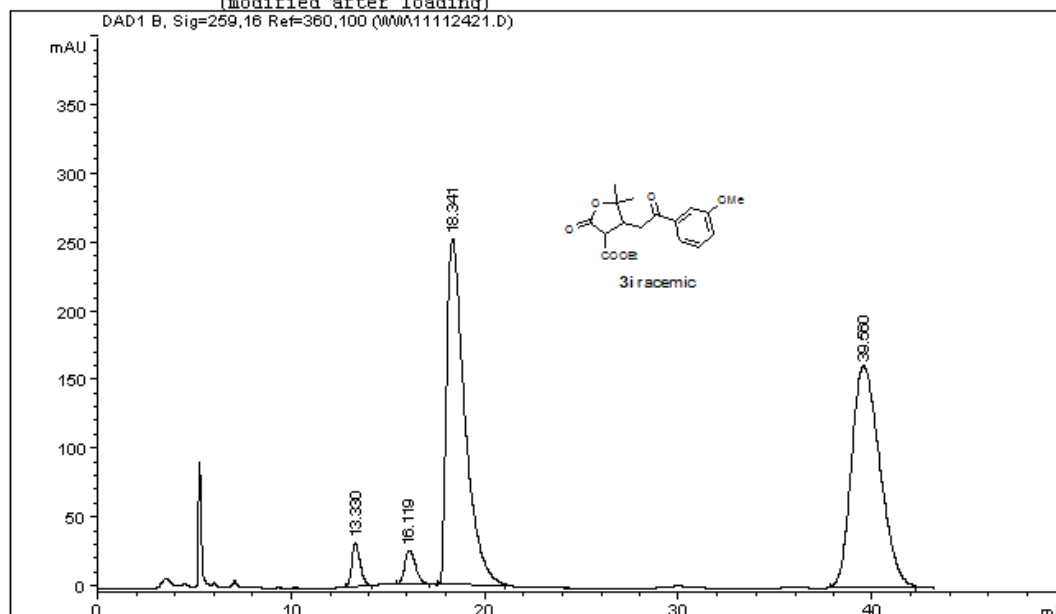

=====  
Area Percent Report  
=====

Sorted By : Signal  
Multiplier : 1.0000  
Dilution : 1.0000  
Sample Amount : 10.00000 [ng/ul] (not used in calc.)

Signal 1: DAD1 B, Sig=259,16 Ref=360,100

| Peak # | RetTime [min] | Type | Width [min] | Area [mAU*s] | Height [mAU] | Area %  |
|--------|---------------|------|-------------|--------------|--------------|---------|
| 1      | 13.330        | PB   | 0.4714      | 941.91302    | 31.26915     | 2.7174  |
| 2      | 16.119        | BB   | 0.5639      | 949.04150    | 24.71791     | 2.7379  |
| 3      | 18.341        | BB   | 0.9678      | 1.63930e4    | 252.38571    | 47.2930 |
| 4      | 39.560        | BB   | 1.4401      | 1.63787e4    | 161.10323    | 47.2517 |

Totals : 3.46627e4 469.47600

Results obtained with enhanced integrator!

=====  
\*\*\* End of Report \*\*\*

Data File C:\HPCHEM\1\DATA\WW\11112422.D

Sample Name: 3-ome-ee

=====  
Injection Date : 11/28/2011 3:05:31 PM  
Sample Name : 3-ome-ee Location : -  
Acq. Operator : WW  
Acq. Method : C:\HPCHEM\1\METHODS\LYH.M  
Last changed : 11/28/2011 2:19:09 PM by WW  
(modified after loading)  
Analysis Method : C:\HPCHEM\1\METHODS\LYH.M  
Last changed : 11/28/2011 4:14:19 PM by WW  
(modified after loading)  
=====

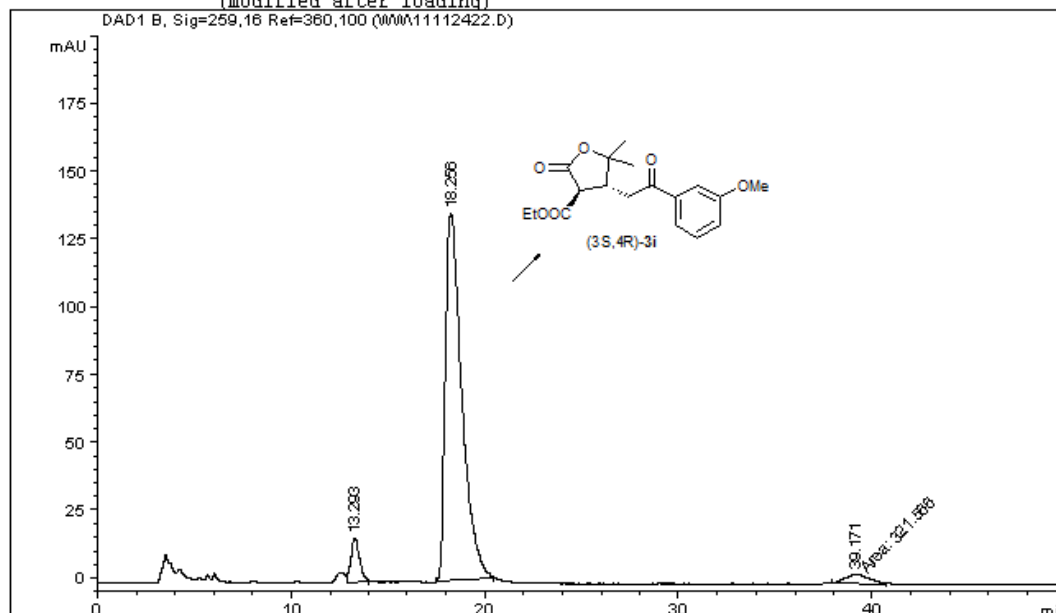

=====  
Area Percent Report  
=====

Sorted By : Signal  
Multiplier : 1.0000  
Dilution : 1.0000  
Sample Amount : 10.00000 [ng/ul] (not used in calc.)

Signal 1: DAD1 B, Sig=259,16 Ref=360,100

| Peak # | RetTime [min] | Type | Width [min] | Area [mAU*s] | Height [mAU] | Area %  |
|--------|---------------|------|-------------|--------------|--------------|---------|
| 1      | 13.293        | VB   | 0.4628      | 501.52890    | 15.77884     | 5.6767  |
| 2      | 18.256        | BB   | 0.8888      | 8011.81152   | 135.30321    | 90.6836 |
| 3      | 39.171        | MM   | 1.5735      | 321.56644    | 3.40613      | 3.6397  |

Totals : 8834.90686 154.48818

Results obtained with enhanced integrator!

=====  
\*\*\* End of Report \*\*\*

### HPLC analysis for compounds 3j

Data File C:\HPCHEM\1\DATA\WW\11112417.D

Sample Name: 3-py-rac

=====  
Injection Date : 11/28/2011 10:41:45 AM  
Sample Name : 3-pv-rac Location : -  
Acq. Operator : WW  
Acq. Method : C:\HPCHEM\1\METHODS\LYH.M  
Last changed : 11/28/2011 10:24:55 AM by WW  
(modified after loading)  
Analysis Method : C:\HPCHEM\1\METHODS\LYH.M  
Last changed : 11/28/2011 2:12:55 PM by WW  
(modified after loading)  
=====

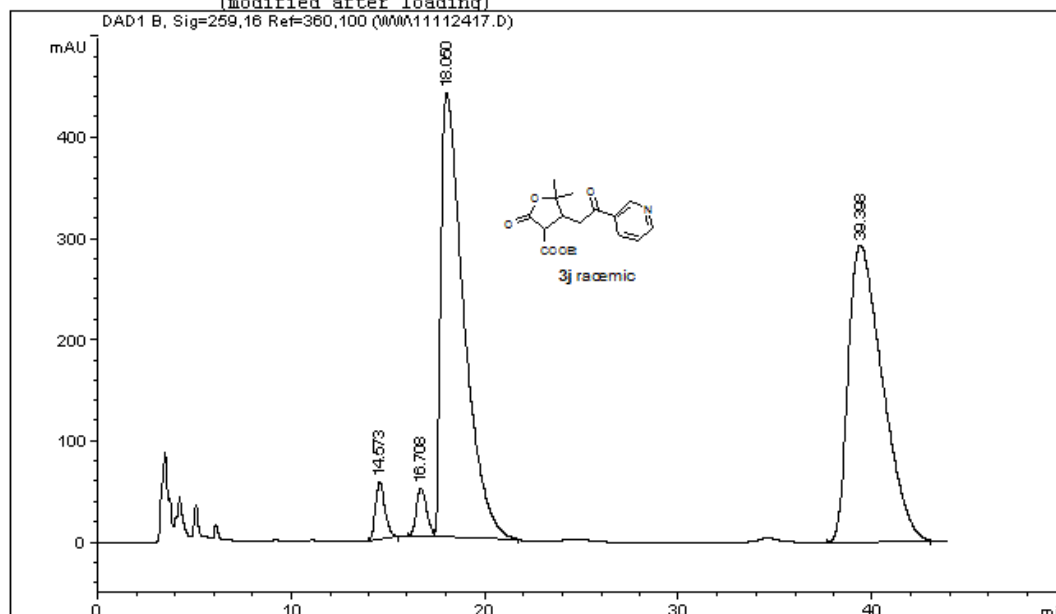

=====  
Area Percent Report  
=====

Sorted By : Signal  
Multiplier : 1.0000  
Dilution : 1.0000  
Sample Amount : 10.00000 [ng/ul] (not used in calc.)

Signal 1: DAD1 B, Sig=259,16 Ref=360,100

| Peak # | RetTime [min] | Type | Width [min] | Area [mAU*s] | Height [mAU] | Area %  |
|--------|---------------|------|-------------|--------------|--------------|---------|
| 1      | 14.573        | BB   | 0.5182      | 1941.67969   | 57.17630     | 2.5587  |
| 2      | 16.708        | BV   | 0.5760      | 1803.40320   | 48.03959     | 2.3765  |
| 3      | 18.050        | VB   | 1.1526      | 3.62412e4    | 440.13437    | 47.7581 |
| 4      | 39.398        | BB   | 1.6258      | 3.58987e4    | 293.33398    | 47.3067 |

Totals : 7.58850e4 838.68423

Results obtained with enhanced integrator!

=====  
\*\*\* End of Report \*\*\*

Data File C:\HPCHEM\1\DATA\WW\11112418.D

Sample Name: 3-py-ee

=====  
Injection Date : 11/28/2011 11:26:54 AM  
Sample Name : 3-py-ee Location : -  
Acq. Operator : WW  
Acq. Method : C:\HPCHEM\1\METHODS\LYH.M  
Last changed : 11/28/2011 10:24:55 AM by WW  
(modified after loading)  
Analysis Method : C:\HPCHEM\1\METHODS\LYH.M  
Last changed : 11/28/2011 2:14:33 PM by WW  
(modified after loading)  
=====

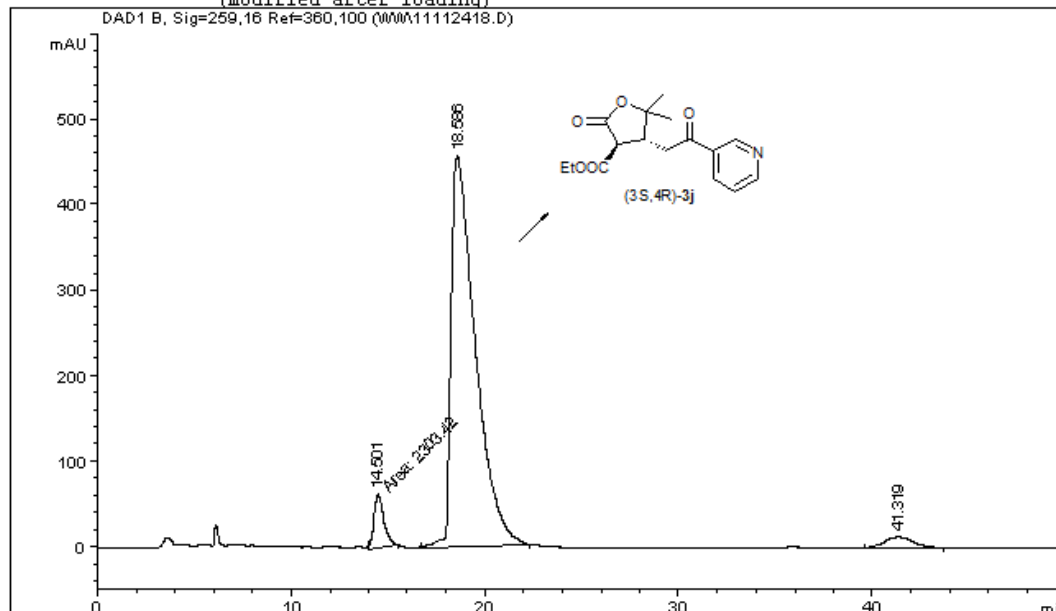

=====  
Area Percent Report  
=====

Sorted By : Signal  
Multiplier : 1.0000  
Dilution : 1.0000  
Sample Amount : 10.00000 [ng/ul] (not used in calc.)

Signal 1: DAD1 B, Sig=259,16 Ref=360,100

| Peak # | RetTime [min] | Type | Width [min] | Area [mAU*s] | Height [mAU] | Area %  |
|--------|---------------|------|-------------|--------------|--------------|---------|
| 1      | 14.501        | MM   | 0.6058      | 2303.41870   | 63.37135     | 5.3200  |
| 2      | 18.586        | BB   | 1.1937      | 3.97404e4    | 455.55710    | 91.7849 |
| 3      | 41.319        | BB   | 1.1822      | 1253.51392   | 12.43305     | 2.8951  |

Totals : 4.32973e4 531.36150

Results obtained with enhanced integrator!

=====  
\*\*\* End of Report \*\*\*  
=====

### HPLC analysis for compounds 3k

Data File C:\HPCHEM\1\DATA\WW\11101702.D

Sample Name: 2-furan-rac

=====  
Injection Date : 10/17/2011 6:13:55 PM  
Sample Name : 2-furan-rac Location : -  
Acq. Operator : WW  
Acq. Method : C:\HPCHEM\1\METHODS\LYH.M  
Last changed : 10/17/2011 4:02:26 PM by WW  
(modified after loading)  
Analysis Method : C:\HPCHEM\1\METHODS\LYH.M  
Last changed : 10/17/2011 7:13:38 PM by WW  
(modified after loading)

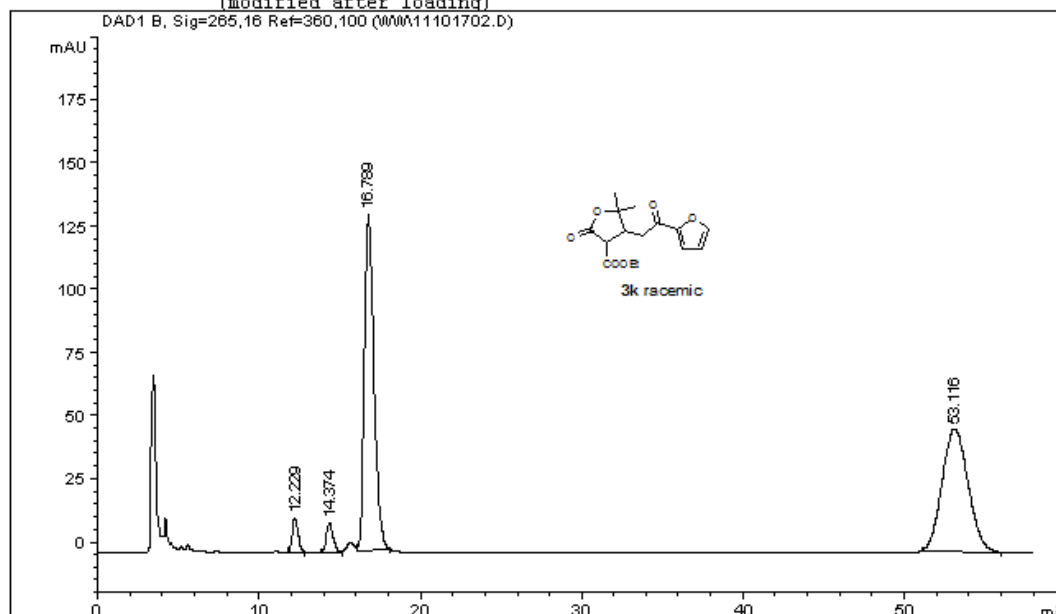

=====  
Area Percent Report  
=====

Sorted By : Signal  
Multiplier : 1.0000  
Dilution : 1.0000  
Sample Amount : 1.00000 [ng/ul] (not used in calc.)

Signal 1: DAD1 B, Sig=265,16 Ref=360,100

| Peak # | RetTime [min] | Type | Width [min] | Area [mAU*s] | Height [mAU] | Area %  |
|--------|---------------|------|-------------|--------------|--------------|---------|
| 1      | 12.229        | BB   | 0.3757      | 333.27261    | 13.42262     | 2.8885  |
| 2      | 14.374        | BB   | 0.4302      | 330.41159    | 11.53449     | 2.8637  |
| 3      | 16.789        | VB   | 0.6253      | 5453.09229   | 132.73445    | 47.2619 |
| 4      | 53.116        | BB   | 1.3395      | 5421.25684   | 48.44752     | 46.9860 |

Totals : 1.15380e4 206.13907

Results obtained with enhanced integrator!

=====  
\*\*\* End of Report \*\*\*



Data File C:\HPCHEM\1\DATA\WW\11101703.D

Sample Name: 2-furan-ee

=====  
Injection Date : 10/17/2011 7:15:43 PM  
Sample Name : 2-furan-ee Location : -  
Acq. Operator : WW  
Acq. Method : C:\HPCHEM\1\METHODS\LYH.M  
Last changed : 10/17/2011 4:02:26 PM by WW  
(modified after loading)  
Analysis Method : C:\HPCHEM\1\METHODS\LYH.M  
Last changed : 10/17/2011 8:15:45 PM by WW  
(modified after loading)

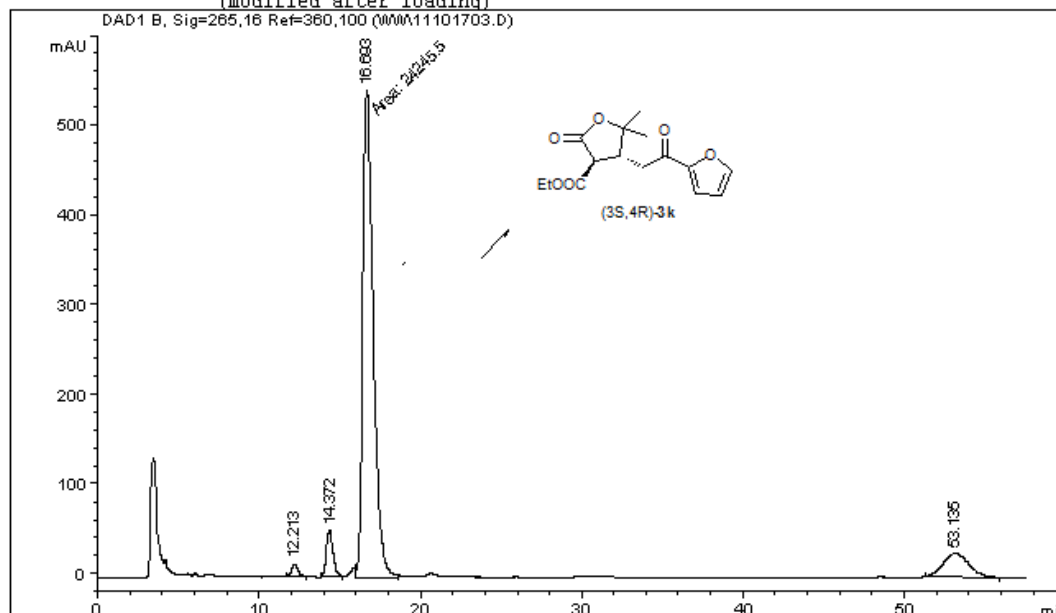

=====  
Area Percent Report  
=====

Sorted By : Signal  
Multiplier : 1.0000  
Dilution : 1.0000  
Sample Amount : 1.00000 [ng/ul] (not used in calc.)

Signal 1: DAD1 B, Sig=265,16 Ref=360,100

| Peak # | RetTime [min] | Type | Width [min] | Area [mAU*s] | Height [mAU] | Area %  |
|--------|---------------|------|-------------|--------------|--------------|---------|
| 1      | 12.213        | PB   | 0.4024      | 354.37698    | 13.67076     | 1.2250  |
| 2      | 14.372        | BB   | 0.4520      | 1503.35681   | 51.58997     | 5.1967  |
| 3      | 16.693        | MM   | 0.7448      | 2.42455e4    | 542.53320    | 83.8105 |
| 4      | 53.135        | BB   | 1.2895      | 2825.71582   | 25.80510     | 9.7678  |

Totals : 2.89290e4 633.59904

Results obtained with enhanced integrator!

=====  
\*\*\* End of Report \*\*\*

### HPLC analysis for compounds 3I

Data File C:\HPCHEM\1\DATA\WW\11110721.D

Sample Name: 3-NHAc-rac-AD

```
=====
Injection Date   : 11/9/2011 11:46:34 AM
Sample Name     : 3-NHAc-rac-AD           Location :   -
Acq. Operator   : WW
Acq. Method     : C:\HPCHEM\1\METHODS\LYH.M
Last changed    : 11/9/2011 9:37:34 AM by WW
                  (modified after loading)
Analysis Method : C:\HPCHEM\1\METHODS\LYH.M
Last changed    : 11/9/2011 12:56:46 PM by WW
                  (modified after loading)
=====
```

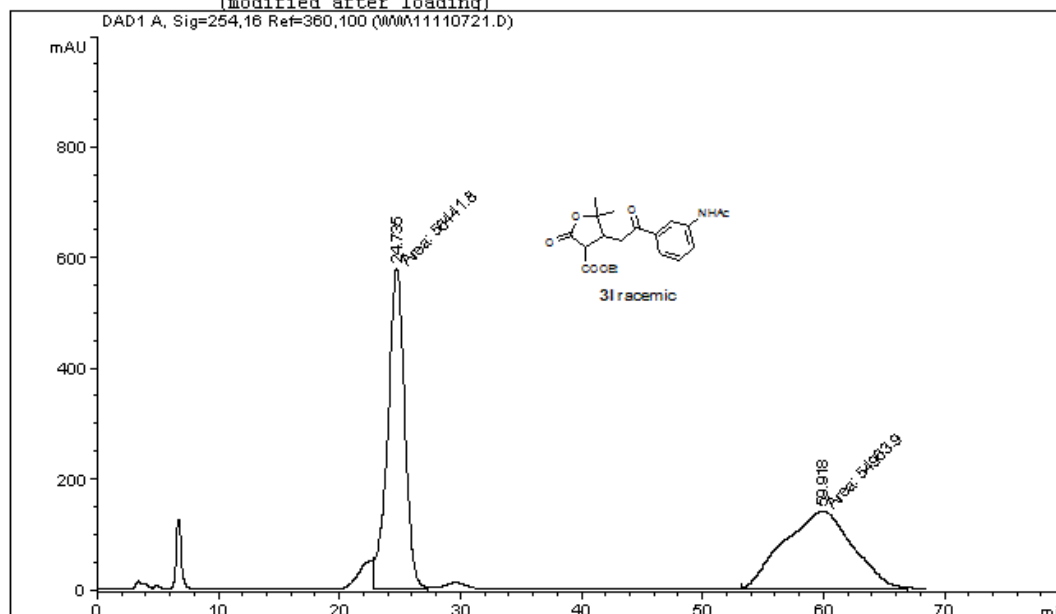

=====  
Area Percent Report  
=====

```
Sorted By      : Signal
Multiplier     : 1.0000
Dilution       : 1.0000
Sample Amount  : 1.00000 [ng/ul] (not used in calc.)
```

Signal 1: DAD1 A, Sig=254,16 Ref=360,100

| Peak # | RetTime [min] | Type | Width [min] | Area [mAU*s] | Height [mAU] | Area %  |
|--------|---------------|------|-------------|--------------|--------------|---------|
| 1      | 24.735        | MM   | 1.6288      | 5.64418e4    | 577.55023    | 50.6633 |
| 2      | 59.918        | MM   | 6.5492      | 5.49639e4    | 139.87419    | 49.3367 |

Totals : 1.11406e5 717.42442

Results obtained with enhanced integrator!

=====  
\*\*\* End of Report \*\*\*

Data File C:\HPCHEM\1\DATA\WW\11110720.D

Sample Name: 3-NHAc-ee-AD

=====  
Injection Date : 11/9/2011 10:12:42 AM  
Sample Name : 3-NHAc-ee-AD Location : -  
Acq. Operator : WW  
Acq. Method : C:\HPCHEM\1\METHODS\LYH.M  
Last changed : 11/9/2011 9:37:34 AM by WW  
(modified after loading)  
Analysis Method : C:\HPCHEM\1\METHODS\LYH.M  
Last changed : 11/9/2011 1:01:37 PM by WW  
(modified after loading)  
=====

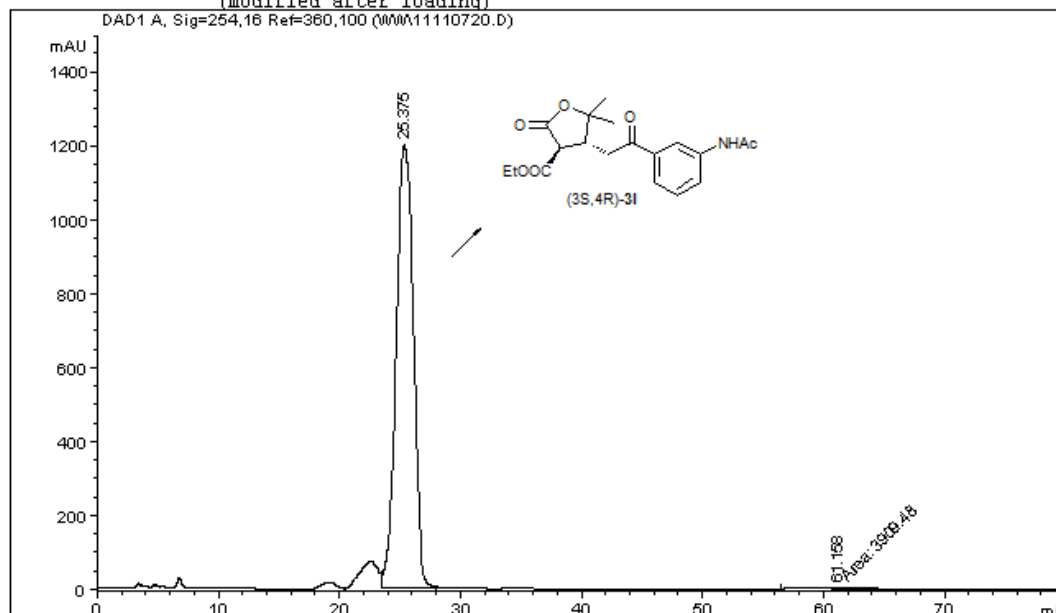

=====  
Area Percent Report  
=====

Sorted By : Signal  
Multiplier : 1.0000  
Dilution : 1.0000  
Sample Amount : 1.00000 [ng/ul] (not used in calc.)

Signal 1: DAD1 A, Sig=254,16 Ref=360,100

| Peak # | RetTime [min] | Type | Width [min] | Area [mAU*s] | Height [mAU] | Area %  |
|--------|---------------|------|-------------|--------------|--------------|---------|
| 1      | 25.375        | VB   | 1.2528      | 1.17927e5    | 1199.70178   | 96.7912 |
| 2      | 61.158        | MM   | 7.0493      | 3909.48193   | 9.24313      | 3.2088  |

Totals : 1.21837e5 1208.94491

Results obtained with enhanced integrator!

=====  
\*\*\* End of Report \*\*\*  
=====

### HPLC analysis for compounds **3m**

Data File C:\HPCHEM\1\DATA\WW\11112402.D

Sample Name: 3-Me-rac

=====  
Injection Date : 11/24/2011 3:24:17 PM  
Sample Name : 3-Me-rac Location : -  
Acq. Operator : WW  
Acq. Method : C:\HPCHEM\1\METHODS\LYH.M  
Last changed : 11/24/2011 3:21:37 PM by WW  
(modified after loading)  
Analysis Method : C:\HPCHEM\1\METHODS\LYH.M  
Last changed : 11/24/2011 4:32:29 PM by WW  
(modified after loading)  
=====

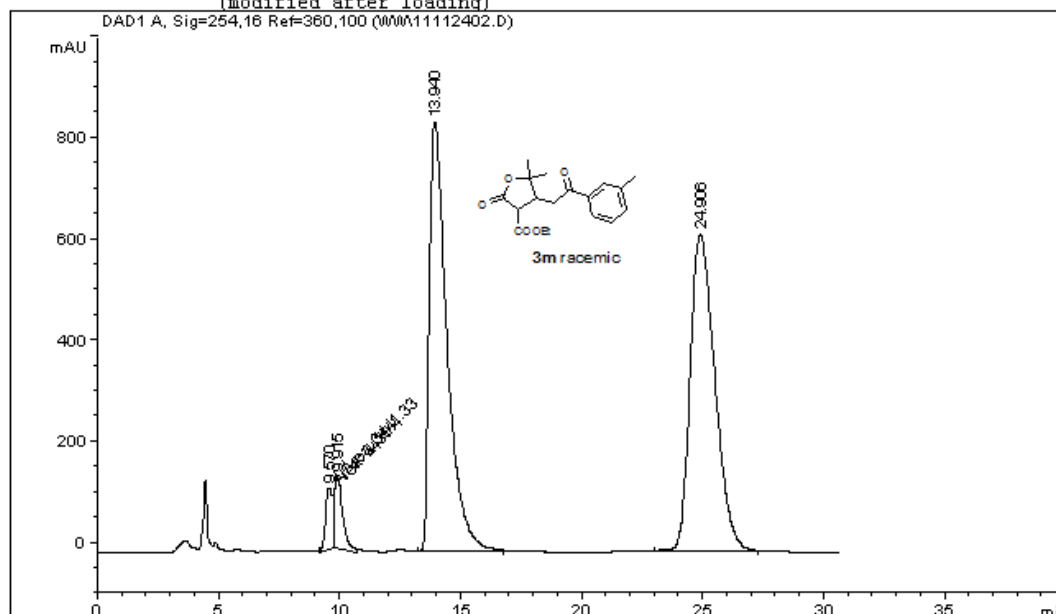

=====  
Area Percent Report  
=====

Sorted By : Signal  
Multiplier : 1.0000  
Dilution : 1.0000  
Sample Amount : 10.00000 [ng/ul] (not used in calc.)

Signal 1: DAD1 A, Sig=254,16 Ref=360,100

| Peak # | RetTime [min] | Type | Width [min] | Area [mAU*s] | Height [mAU] | Area %  |
|--------|---------------|------|-------------|--------------|--------------|---------|
| 1      | 9.570         | MM   | 0.3346      | 2430.39673   | 121.06307    | 2.5943  |
| 2      | 9.915         | MM   | 0.4004      | 3441.32568   | 143.24646    | 3.6734  |
| 3      | 13.940        | VB   | 0.7630      | 4.33240e4    | 846.59241    | 46.2454 |
| 4      | 24.906        | BB   | 1.0805      | 4.44871e4    | 624.93292    | 47.4869 |

Totals : 9.36829e4 1735.83486

Results obtained with enhanced integrator!

=====  
\*\*\* End of Report \*\*\*

Data File C:\HPCHEM\1\DATA\WW\11112403.D

Sample Name: 3-Me-ee

=====  
Injection Date : 11/24/2011 4:02:05 PM  
Sample Name : 3-Me-ee Location : -  
Acq. Operator : WW  
Acq. Method : C:\HPCHEM\1\METHODS\LYH.M  
Last changed : 11/24/2011 3:21:37 PM by WW  
(modified after loading)  
Analysis Method : C:\HPCHEM\1\METHODS\LYH.M  
Last changed : 11/24/2011 4:34:53 PM by WW  
(modified after loading)  
=====

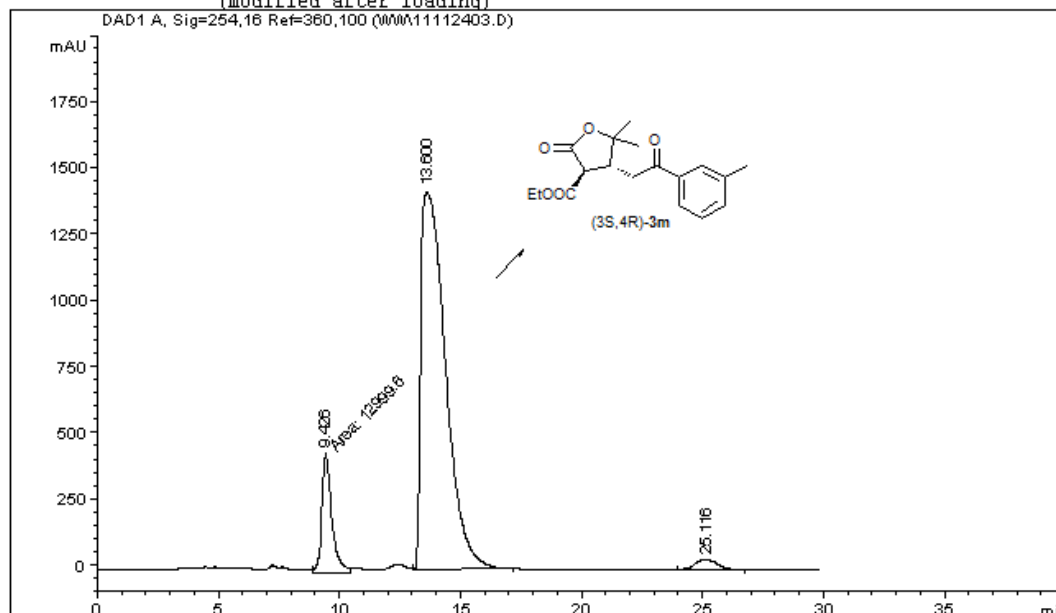

=====  
Area Percent Report  
=====

Sorted By : Signal  
Multiplier : 1.0000  
Dilution : 1.0000  
Sample Amount : 10.00000 [ng/ul] (not used in calc.)

Signal 1: DAD1 A, Sig=254,16 Ref=360,100

| Peak # | RetTime [min] | Type | Width [min] | Area [mAU*s] | Height [mAU] | Area %  |
|--------|---------------|------|-------------|--------------|--------------|---------|
| 1      | 9.426         | MM   | 0.4827      | 1.29996e4    | 448.86884    | 11.1659 |
| 2      | 13.600        | WB   | 0.9294      | 1.00902e5    | 1426.13123   | 86.6695 |
| 3      | 25.116        | BB   | 0.9044      | 2520.02881   | 39.70675     | 2.1646  |

Totals : 1.16422e5 1914.70681

Results obtained with enhanced integrator!

=====  
\*\*\* End of Report \*\*\*

Instrument 1 11/24/2011 4:34:59 PM WW

Page 1 of 1

### HPLC analysis for compounds 3n

Data File C:\HPCHEM\1\DATA\WW\12041301.D

Sample Name: 3f-rac

=====  
Injection Date : 4/13/2012 10:49:12 AM  
Sample Name : 3f-rac Location : Vial 1  
Acq. Operator : WW  
Acq. Method : C:\HPCHEM\1\METHODS\LYH.M  
Last changed : 4/13/2012 10:48:12 AM by WW  
(modified after loading)  
Analysis Method : C:\HPCHEM\1\METHODS\LYH.M  
Last changed : 4/13/2012 1:47:28 PM by WW  
(modified after loading)  
=====

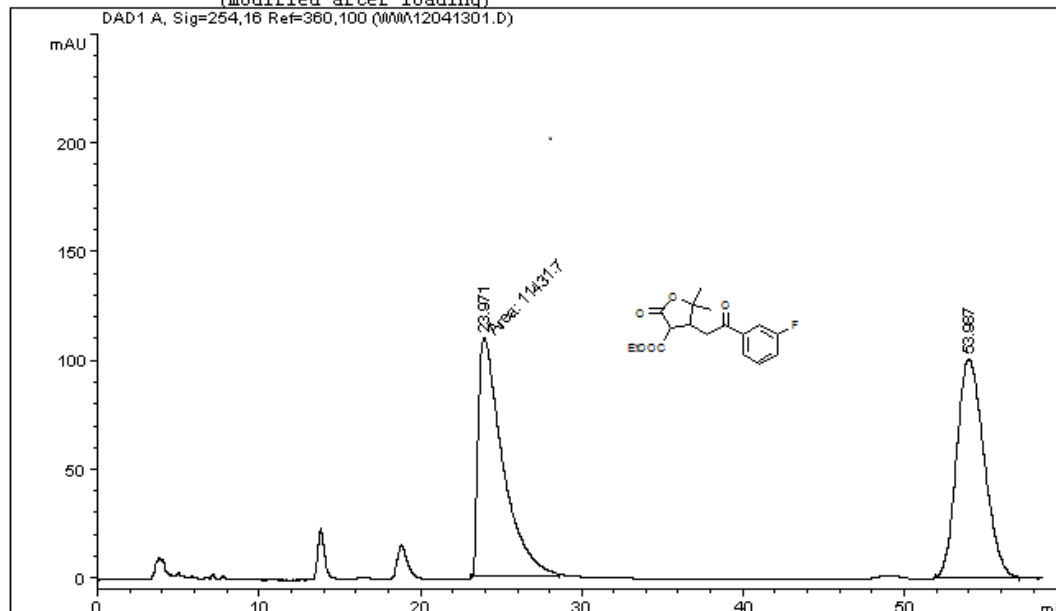

=====  
Area Percent Report  
=====

Sorted By : Signal  
Multiplier : 1.0000  
Dilution : 1.0000  
Sample Amount : 1.00000 [ng/ul] (not used in calc.)

Signal 1: DAD1 A, Sig=254,16 Ref=360,100

| Peak # | RetTime [min] | Type | Width [min] | Area [mAU*s] | Height [mAU] | Area %  |
|--------|---------------|------|-------------|--------------|--------------|---------|
| 1      | 23.971        | MM   | 1.7476      | 1.14317e4    | 109.02094    | 49.1394 |
| 2      | 53.987        | BB   | 1.3941      | 1.18321e4    | 100.02488    | 50.8606 |

Totals : 2.32638e4 209.04581

Results obtained with enhanced integrator!

=====  
\*\*\* End of Report \*\*\*  
=====

Data File C:\HPCHEM\1\DATA\WW\12041300.D

Sample Name: 3f-70

=====  
Injection Date : 4/13/2012 9:45:59 AM  
Sample Name : 3f-70 Location : Vial 1  
Acq. Operator : WW  
Acq. Method : C:\HPCHEM\1\METHODS\LYH.M  
Last changed : 4/13/2012 9:32:19 AM by WW  
(modified after loading)  
Analysis Method : C:\HPCHEM\1\METHODS\LYH.M  
Last changed : 4/13/2012 10:50:32 AM by WW  
(modified after loading)  
=====

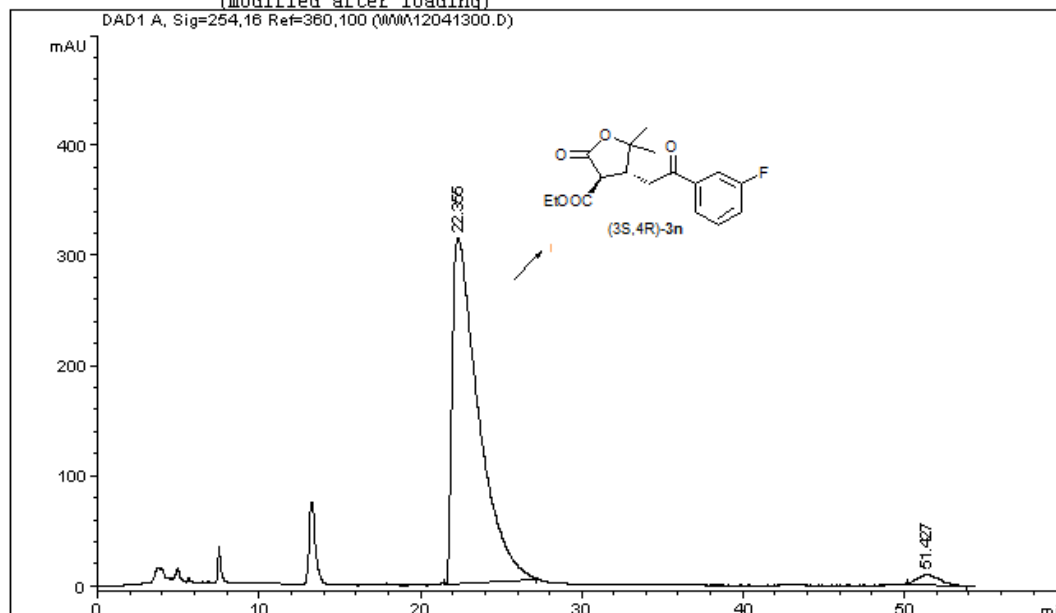

=====  
Area Percent Report  
=====

Sorted By : Signal  
Multiplier : 1.0000  
Dilution : 1.0000  
Sample Amount : 1.00000 [ng/ul] (not used in calc.)

Signal 1: DAD1 A, Sig=254,16 Ref=360,100

| Peak # | RetTime [min] | Type | Width [min] | Area [mAU*s] | Height [mAU] | Area %  |
|--------|---------------|------|-------------|--------------|--------------|---------|
| 1      | 22.355        | BB   | 1.4767      | 3.53956e4    | 314.09760    | 97.4795 |
| 2      | 51.427        | BB   | 1.1765      | 915.21033    | 9.18482      | 2.5205  |

Totals : 3.63108e4 323.28242

Results obtained with enhanced integrator!

=====  
\*\*\* End of Report \*\*\*  
=====

### HPLC analysis for compounds **3o**

Data File C:\HPCHEM\1\DATA\WW\12043006.D

Sample Name: 2-thia-rac

```
=====
Injection Date   : 5/1/2012 12:08:39 PM
Sample Name     : 2-thia-rac                Location : Vial 1
Acq. Operator   : WW
Acq. Method     : C:\HPCHEM\1\METHODS\LYH.M
Last changed    : 5/1/2012 12:04:43 PM by WW
                  (modified after loading)
Analysis Method : C:\HPCHEM\1\METHODS\LYH.M
Last changed    : 5/1/2012 4:46:56 PM by WW
                  (modified after loading)
=====
```

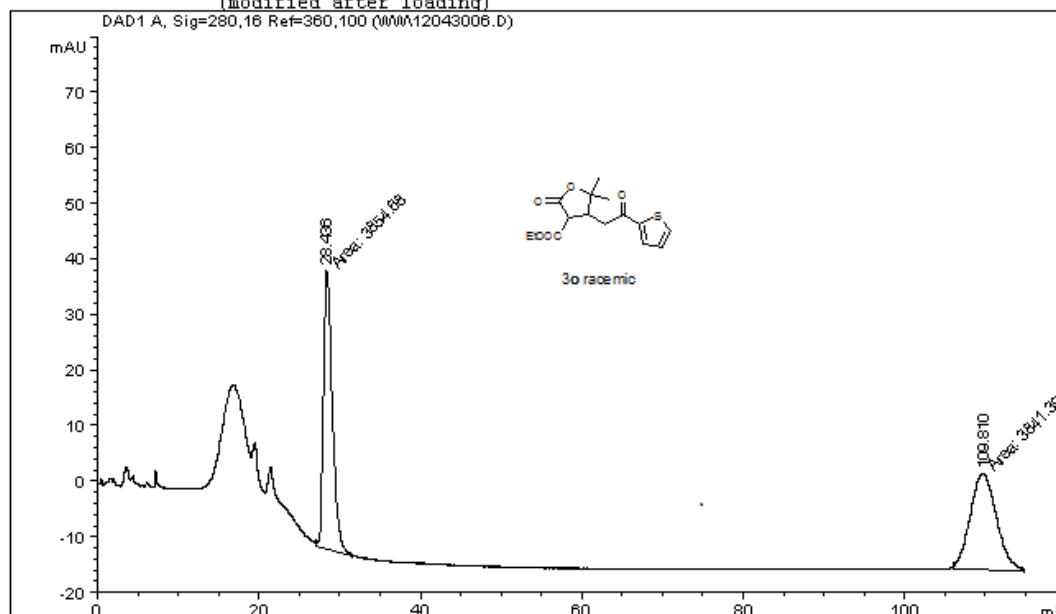

=====  
Area Percent Report  
=====

```
Sorted By      : Signal
Multiplier     : 1.0000
Dilution       : 1.0000
Sample Amount  : 1.00000 [ng/ul] (not used in calc.)
```

Signal 1: DAD1 A, Sig=280,16 Ref=360,100

| Peak # | RetTime [min] | Type | Width [min] | Area [mAU*s] | Height [mAU] | Area %  |
|--------|---------------|------|-------------|--------------|--------------|---------|
| 1      | 28.436        | MM   | 1.2886      | 3854.68384   | 49.85543     | 50.0864 |
| 2      | 109.810       | MM   | 3.7284      | 3841.39136   | 17.17189     | 49.9136 |

Totals : 7696.07520 67.02732

Results obtained with enhanced integrator!

=====  
\*\*\* End of Report \*\*\*



Data File C:\HPCHEM\1\DATA\WW\12043007.D

Sample Name: 2-thia-70

```
=====  
Injection Date : 5/1/2012 2:05:28 PM  
Sample Name : 2-thia-70 Location : Vial 1  
Acq. Operator : WW  
Acq. Method : C:\HPCHEM\1\METHODS\LYH.M  
Last changed : 5/1/2012 12:04:43 PM by WW  
(modified after loading)  
Analysis Method : C:\HPCHEM\1\METHODS\LYH.M  
Last changed : 5/1/2012 4:48:08 PM by WW  
(modified after loading)  
=====
```

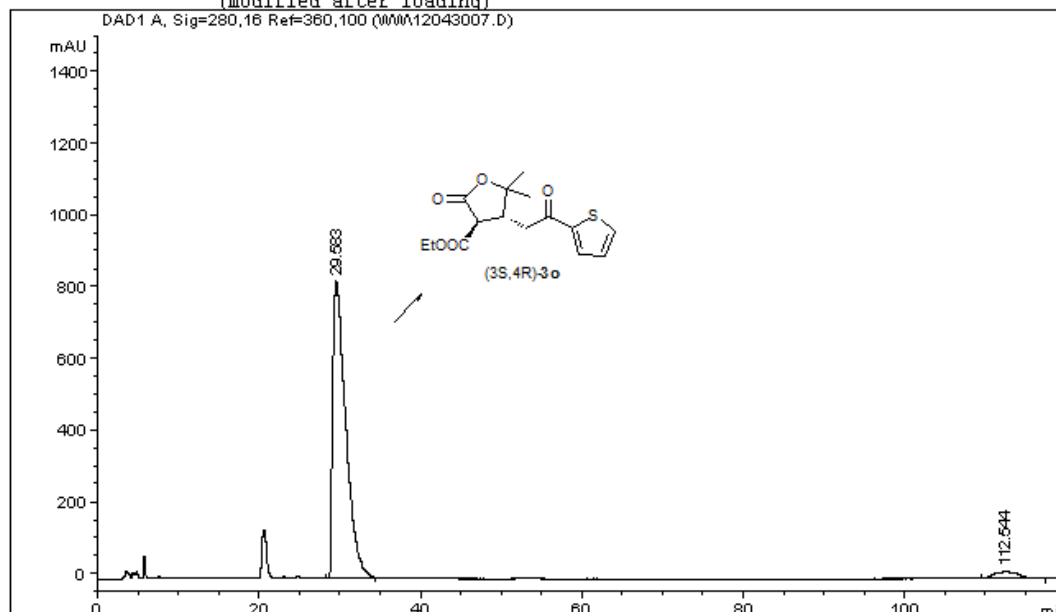

```
=====  
Area Percent Report  
=====
```

```
Sorted By : Signal  
Multiplier : 1.0000  
Dilution : 1.0000  
Sample Amount : 1.00000 [ng/ul] (not used in calc.)
```

Signal 1: DAD1 A, Sig=280,16 Ref=360,100

| Peak # | RetTime [min] | Type | Width [min] | Area [mAU*s] | Height [mAU] | Area %  |
|--------|---------------|------|-------------|--------------|--------------|---------|
| 1      | 29.583        | BB   | 1.5692      | 9.26389e4    | 829.34711    | 95.8444 |
| 2      | 112.544       | BB   | 2.4482      | 4016.60791   | 19.28254     | 4.1556  |

Totals : 9.66556e4 848.62965

Results obtained with enhanced integrator!

```
=====  
*** End of Report ***
```

### HPLC analysis for compounds 3p

Data File C:\HPCHEM\1\DATA\WW\12032012.D

Sample Name: 030902

=====  
Injection Date : 3/22/2012 7:09:36 PM  
Sample Name : 030902 Location : -  
Acq. Operator : WW  
Acq. Method : C:\HPCHEM\1\METHODS\LYH.M  
Last changed : 3/22/2012 4:40:14 PM by WW  
(modified after loading)  
Analysis Method : C:\HPCHEM\1\METHODS\LYH.M  
Last changed : 3/23/2012 8:08:11 PM by WW  
(modified after loading)  
=====

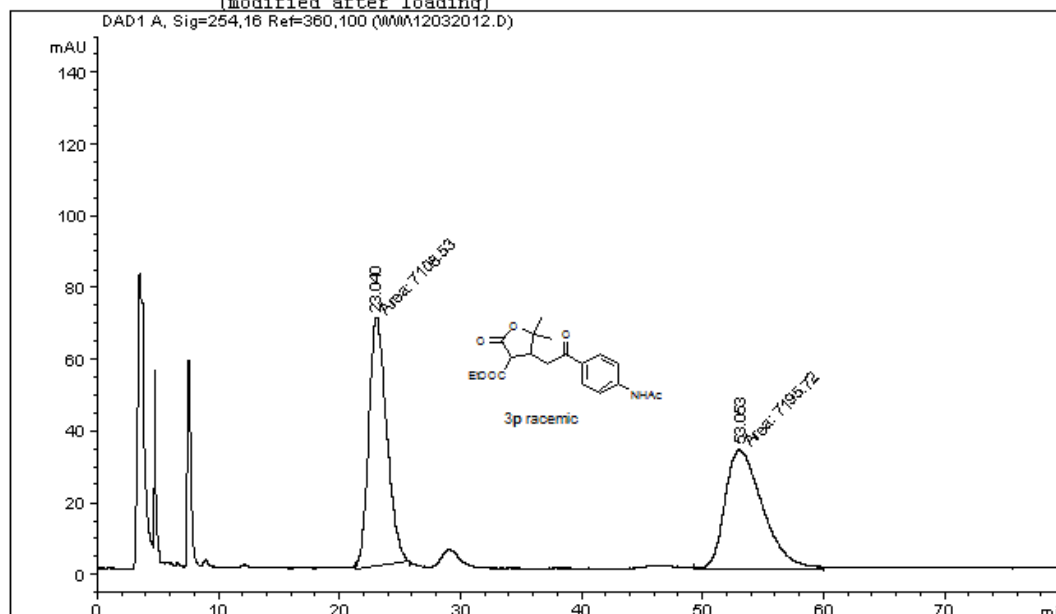

=====  
Area Percent Report  
=====

Sorted By : Signal  
Multiplier : 1.0000  
Dilution : 1.0000  
Sample Amount : 1.00000 [ng/ul] (not used in calc.)

Signal 1: DAD1 A, Sig=254,16 Ref=360,100

| Peak # | RetTime [min] | Type | Width [min] | Area [mAU*s] | Height [mAU] | Area %  |
|--------|---------------|------|-------------|--------------|--------------|---------|
| 1      | 23.040        | MM   | 1.7117      | 7108.53223   | 69.21575     | 49.6953 |
| 2      | 53.053        | MM   | 3.6029      | 7195.71582   | 33.28659     | 50.3047 |

Totals : 1.43042e4 102.50234

Results obtained with enhanced integrator!

=====  
\*\*\* End of Report \*\*\*

Data File C:\HPCHEM\1\DATA\WW\12032013.D

Sample Name: 031102

=====  
Injection Date : 3/22/2012 8:52:06 PM  
Sample Name : 031102 Location : -  
Acq. Operator : WW  
Acq. Method : C:\HPCHEM\1\METHODS\LYH.M  
Last changed : 3/22/2012 4:40:14 PM by WW  
(modified after loading)  
Analysis Method : C:\HPCHEM\1\METHODS\LYH.M  
Last changed : 3/23/2012 8:13:10 PM by WW  
(modified after loading)  
=====

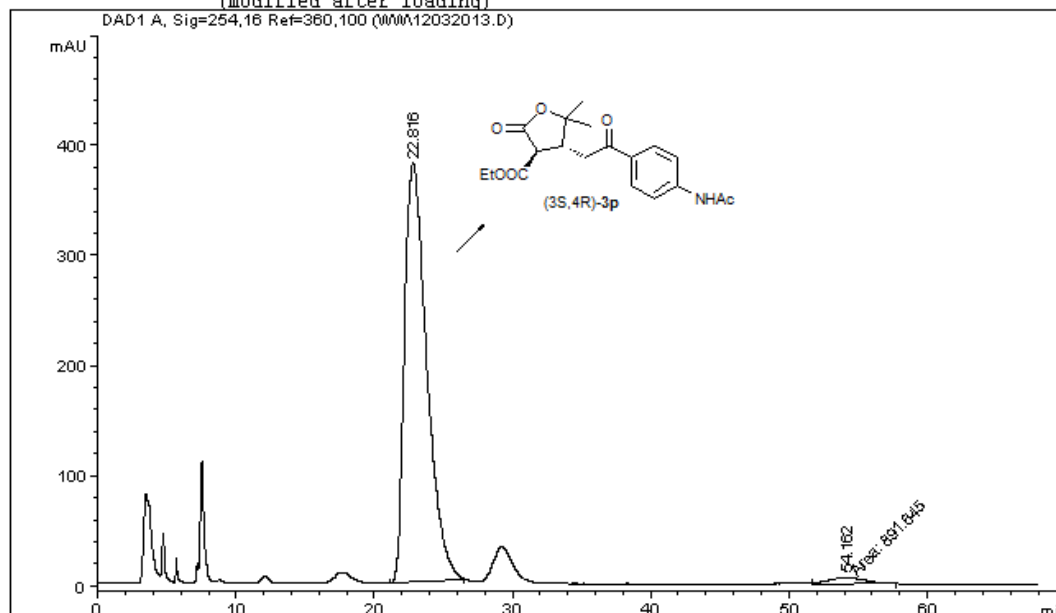

=====  
Area Percent Report  
=====

Sorted By : Signal  
Multiplier : 1.0000  
Dilution : 1.0000  
Sample Amount : 1.00000 [ng/ul] (not used in calc.)

Signal 1: DAD1 A, Sig=254,16 Ref=360,100

| Peak # | RetTime [min] | Type | Width [min] | Area [mAU*s] | Height [mAU] | Area %  |
|--------|---------------|------|-------------|--------------|--------------|---------|
| 1      | 22.816        | BB   | 1.5166      | 4.24162e4    | 379.88953    | 97.9411 |
| 2      | 54.162        | MM   | 3.0946      | 891.64539    | 4.80213      | 2.0589  |

Totals : 4.33078e4 384.69166

Results obtained with enhanced integrator!

=====  
\*\*\* End of Report \*\*\*  
=====

Instrument 1 3/23/2012 8:13:15 PM WW

Page 1 of 1

### HPLC analysis for compounds 3q

Data File C:\HPCHEM\1\DATA\WW\12032015.D

Sample Name: 030901

```
=====
Injection Date : 3/23/2012 10:38:50 AM
Sample Name    : 030901
Acq. Operator  : WW
Acq. Method    : C:\HPCHEM\1\METHODS\LYH.M
Last changed   : 3/23/2012 9:02:52 AM by WW
                (modified after loading)
Analysis Method : C:\HPCHEM\1\METHODS\LYH.M
Last changed   : 3/23/2012 8:22:21 PM by WW
                (modified after loading)
=====
```

Location : -

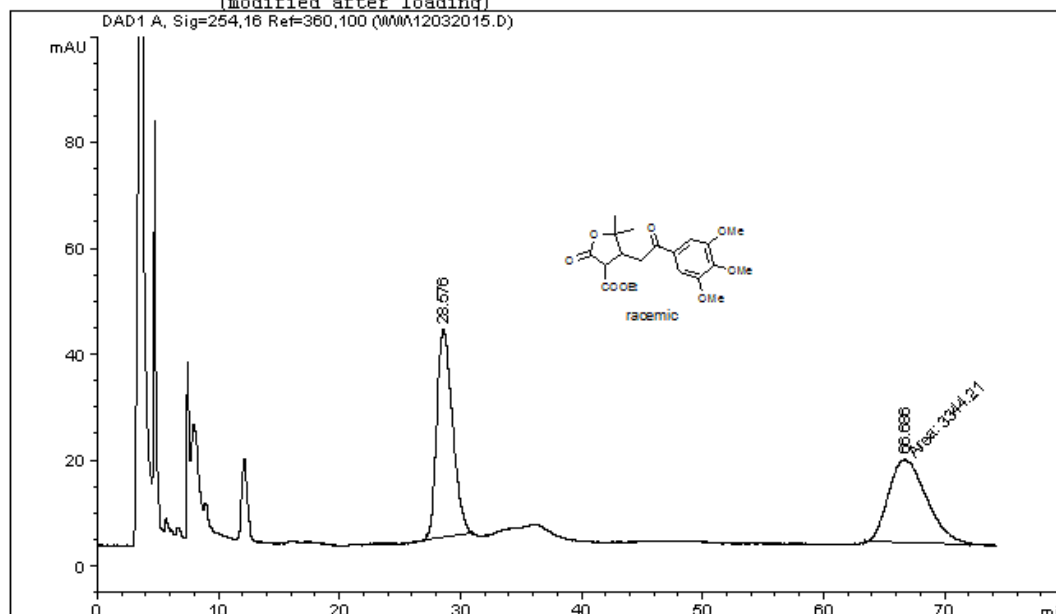

=====  
Area Percent Report  
=====

```
Sorted By      : Signal
Multiplier     : 1.0000
Dilution       : 1.0000
Sample Amount  : 1.00000 [ng/ul] (not used in calc.)
```

Signal 1: DAD1 A, Sig=254,16 Ref=360,100

| Peak # | RetTime [min] | Type | Width [min] | Area [mAU*s] | Height [mAU] | Area %  |
|--------|---------------|------|-------------|--------------|--------------|---------|
| 1      | 28.576        | BB   | 1.0682      | 3558.57593   | 39.23515     | 51.5527 |
| 2      | 66.686        | MM   | 3.5765      | 3344.20996   | 15.58408     | 48.4473 |

Totals : 6902.78589 54.81923

Results obtained with enhanced integrator!

=====  
\*\*\* End of Report \*\*\*

Data File C:\HPCHEM\1\DATA\WV\12032016.D

Sample Name: 031101

=====  
Injection Date : 3/23/2012 11:54:49 AM  
Sample Name : 031101  
Acq. Operator : WV  
Acq. Method : C:\HPCHEM\1\METHODS\LYH.M  
Last changed : 3/23/2012 9:02:52 AM by WV  
(modified after loading)  
Analysis Method : C:\HPCHEM\1\METHODS\LYH.M  
Last changed : 3/23/2012 8:26:49 PM by WV  
(modified after loading)  
=====

Location : -

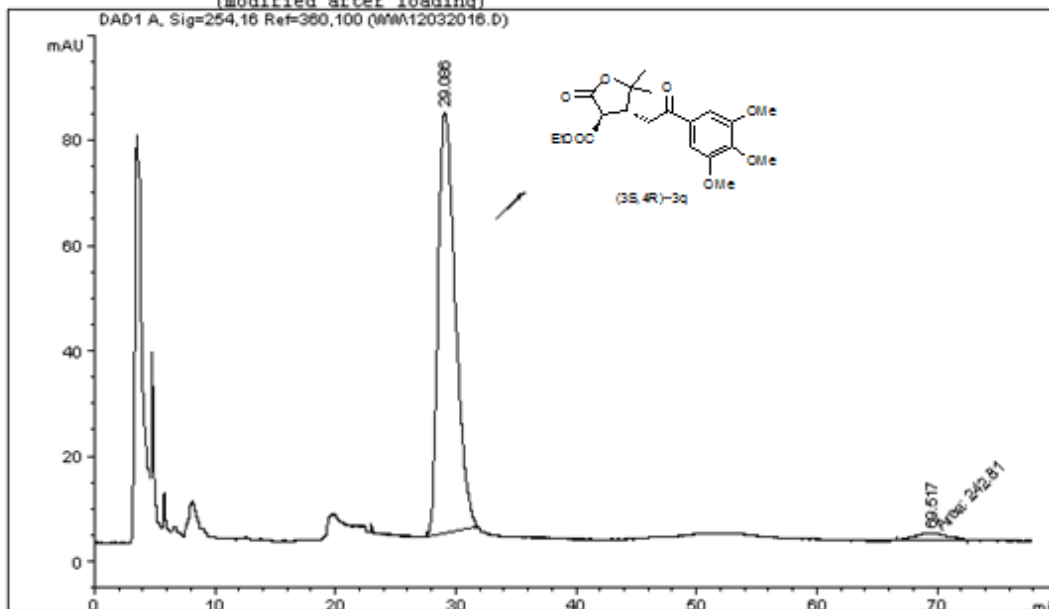

=====  
Area Percent Report  
=====

Sorted By : Signal  
Multiplier : 1.0000  
Dilution : 1.0000  
Sample Amount : 1.00000 [ng/ul] (not used in calc.)

Signal 1: DAD1 A, Sig=254,16 Ref=360,100

| Peak # | RetTime [min] | Type | Width [min] | Area [mAU*s] | Height [mAU] | Area %  |
|--------|---------------|------|-------------|--------------|--------------|---------|
| 1      | 29.086        | BB   | 1.1791      | 7939.75684   | 79.77560     | 97.0326 |
| 2      | 69.517        | MM   | 3.0810      | 242.80988    | 1.31348      | 2.9674  |

Totals : 8182.56671 81.08909

Results obtained with enhanced integrator!

=====  
\*\*\* End of Report \*\*\*  
=====

Instrument 1 3/23/2012 8:26:53 PM WV

Page 1 of 1

### HPLC analysis for compounds 3r

Data File C:\HPCHEM\1\DATA\WW\12032018.D

Sample Name: 030903

=====  
Injection Date : 3/23/2012 2:47:10 PM  
Sample Name : 030903 Location : -  
Acq. Operator : WW  
Acq. Method : C:\HPCHEM\1\METHODS\LYH.M  
Last changed : 3/23/2012 2:46:15 PM by WW  
(modified after loading)  
Analysis Method : C:\HPCHEM\1\METHODS\LYH.M  
Last changed : 3/23/2012 8:28:49 PM by WW  
(modified after loading)  
=====

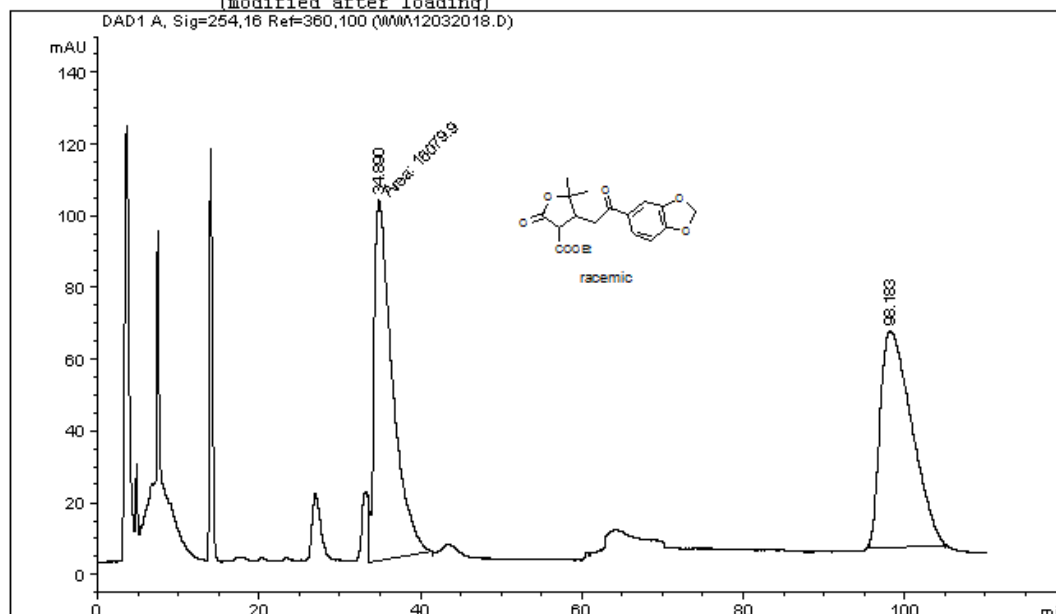

=====  
Area Percent Report  
=====

Sorted By : Signal  
Multiplier : 1.0000  
Dilution : 1.0000  
Sample Amount : 1.00000 [ng/ul] (not used in calc.)

Signal 1: DAD1 A, Sig=254,16 Ref=360,100

| Peak # | RetTime [min] | Type | Width [min] | Area [mAU*s] | Height [mAU] | Area %  |
|--------|---------------|------|-------------|--------------|--------------|---------|
| 1      | 34.890        | MM   | 2.6657      | 1.60799e4    | 100.53497    | 49.5768 |
| 2      | 98.183        | BB   | 3.1727      | 1.63545e4    | 60.36690     | 50.4232 |

Totals : 3.24344e4 160.90187

Results obtained with enhanced integrator!

=====  
\*\*\* End of Report \*\*\*

Data File C:\HPCHEM\1\DATA\WW\12032019.D

Sample Name: 030803

=====  
Injection Date : 3/23/2012 4:42:36 PM  
Sample Name : 030803 Location : -  
Acq. Operator : WW  
Acq. Method : C:\HPCHEM\1\METHODS\LYH.M  
Last changed : 3/23/2012 4:38:32 PM by WW  
(modified after loading)  
Analysis Method : C:\HPCHEM\1\METHODS\LYH.M  
Last changed : 3/23/2012 8:30:36 PM by WW  
(modified after loading)  
=====

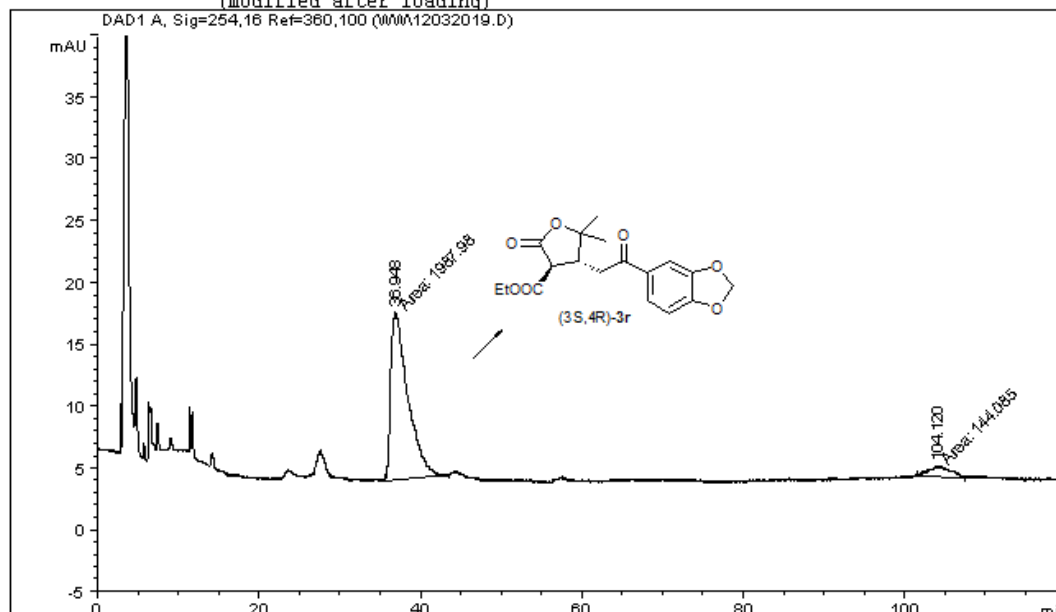

=====  
Area Percent Report  
=====

Sorted By : Signal  
Multiplier : 1.0000  
Dilution : 1.0000  
Sample Amount : 1.00000 [ng/ul] (not used in calc.)

Signal 1: DAD1 A, Sig=254,16 Ref=360,100

| Peak # | RetTime [min] | Type | Width [min] | Area [mAU*s] | Height [mAU] | Area %  |
|--------|---------------|------|-------------|--------------|--------------|---------|
| 1      | 36.948        | MM   | 2.4501      | 1987.98486   | 13.52329     | 93.2420 |
| 2      | 104.120       | MM   | 3.1390      | 144.08461    | 7.65034e-1   | 6.7580  |

Totals : 2132.06947 14.28832

Results obtained with enhanced integrator!

=====  
\*\*\* End of Report \*\*\*  
=====

### HPLC analysis for compounds 3s

Data File C:\HPCHEM\1\DATA\WW\12032010.D

Sample Name: 030604

```
=====
Injection Date : 3/22/2012 2:58:20 PM
Sample Name    : 030604
Acq. Operator  : WW
Acq. Method    : C:\HPCHEM\1\METHODS\LYH.M
Last changed   : 3/22/2012 2:03:32 PM by WW
                (modified after loading)
Analysis Method : C:\HPCHEM\1\METHODS\LYH.M
Last changed   : 3/23/2012 7:39:51 PM by WW
                (modified after loading)
=====
```

Location : -

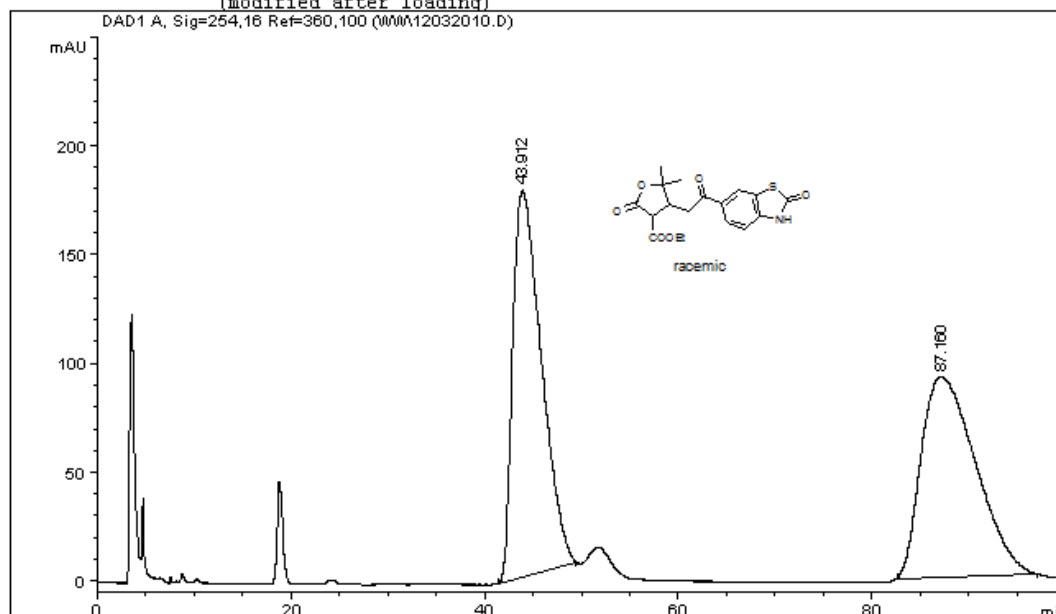

#### Area Percent Report

```
Sorted By      : Signal
Multiplier     : 1.0000
Dilution       : 1.0000
Sample Amount  : 1.00000 [ng/ul] (not used in calc.)
```

Signal 1: DAD1 A, Sig=254,16 Ref=360,100

| Peak # | RetTime [min] | Type | Width [min] | Area [mAU*s] | Height [mAU] | Area %  |
|--------|---------------|------|-------------|--------------|--------------|---------|
| 1      | 43.912        | BB   | 2.4144      | 3.63486e4    | 177.40570    | 50.0387 |
| 2      | 87.160        | BB   | 4.6050      | 3.62923e4    | 92.18559     | 49.9613 |

Totals : 7.26410e4 269.59129

Results obtained with enhanced integrator!

\*\*\* End of Report \*\*\*



Data File C:\HPCHEM\1\DATA\WW\12032011.D

Sample Name: 030503

=====  
Injection Date : 3/22/2012 4:41:20 PM  
Sample Name : 030503 Location : -  
Acq. Operator : WW  
Acq. Method : C:\HPCHEM\1\METHODS\LYH.M  
Last changed : 3/22/2012 4:40:14 PM by WW  
(modified after loading)  
Analysis Method : C:\HPCHEM\1\METHODS\LYH.M  
Last changed : 3/23/2012 8:01:46 PM by WW  
(modified after loading)  
=====

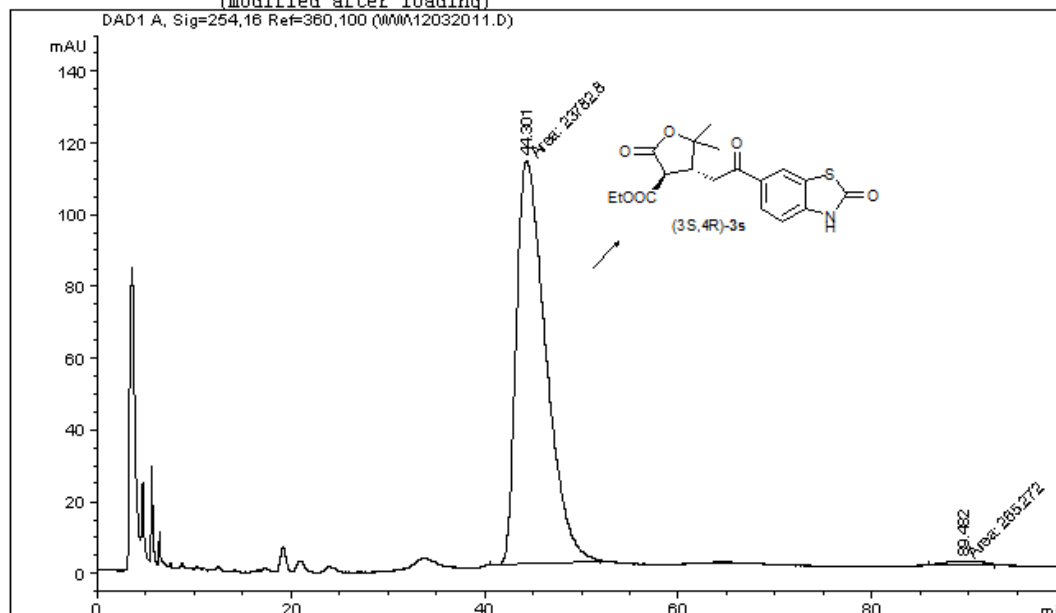

=====  
Area Percent Report  
=====

Sorted By : Signal  
Multiplier : 1.0000  
Dilution : 1.0000  
Sample Amount : 1.00000 [ng/ul] (not used in calc.)

Signal 1: DAD1 A, Sig=254,16 Ref=360,100

| Peak # | RetTime [min] | Type | Width [min] | Area [mAU*s] | Height [mAU] | Area %  |
|--------|---------------|------|-------------|--------------|--------------|---------|
| 1      | 44.301        | MM   | 3.5258      | 2.37828e4    | 112.42238    | 98.8969 |
| 2      | 89.482        | MM   | 3.9156      | 265.27234    | 1.12913      | 1.1031  |

Totals : 2.40481e4 113.55151

Results obtained with enhanced integrator!

=====  
\*\*\* End of Report \*\*\*

### HPLC analysis for compounds 3t

Data File C:\HPCHEM\1\DATA\WU\12032006.D

Sample Name: 030602

```
=====
Injection Date   : 3/22/2012 10:09:45 AM
Sample Name     : 030602
Acq. Operator   : WU
Acq. Method     : C:\HPCHEM\1\METHODS\LYH.M
Last changed    : 3/22/2012 9:19:43 AM by WU
                  (modified after loading)
Analysis Method : C:\HPCHEM\1\METHODS\LYH.M
Last changed    : 3/23/2012 7:23:07 PM by WU
                  (modified after loading)
=====
```

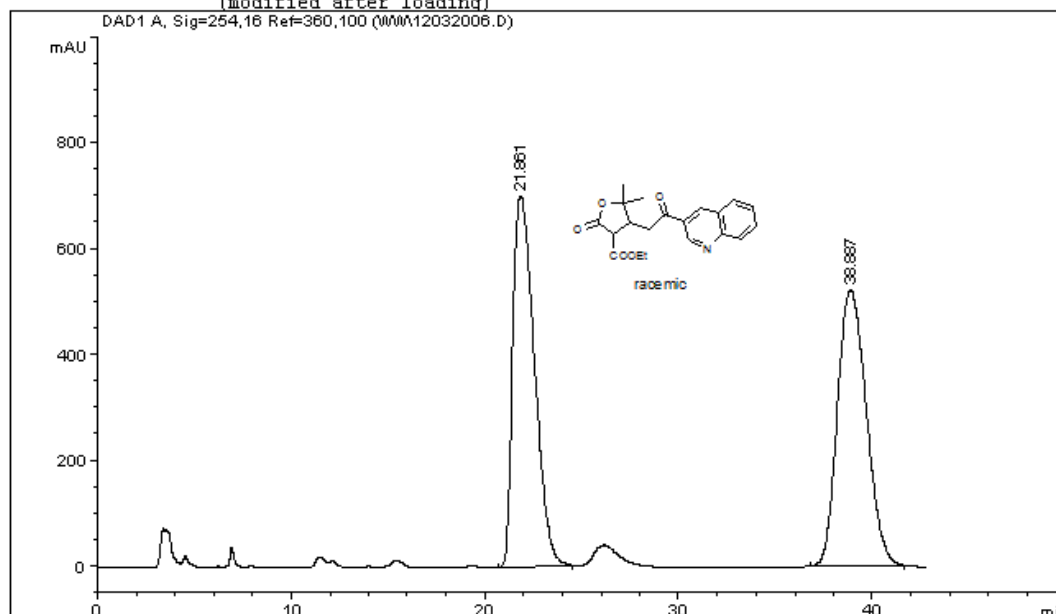

=====  
Area Percent Report  
=====

```
Sorted By      : Signal
Multiplier     : 1.0000
Dilution       : 1.0000
Sample Amount  : 1.00000 [ng/ul] (not used in calc.)
```

Signal 1: DAD1 A, Sig=254,16 Ref=360,100

| Peak # | RetTime [min] | Type | Width [min] | Area [mAU*s] | Height [mAU] | Area %  |
|--------|---------------|------|-------------|--------------|--------------|---------|
| 1      | 21.861        | BB   | 0.9223      | 5.41528e4    | 700.17554    | 50.0869 |
| 2      | 38.887        | BB   | 1.2298      | 5.39649e4    | 520.43024    | 49.9131 |

Totals : 1.08118e5 1220.60577

Results obtained with enhanced integrator!

=====  
\*\*\* End of Report \*\*\*

Data File C:\HPCHEM\1\DATA\WW\12032009.D

Sample Name: 030501

=====  
Injection Date : 3/22/2012 2:04:24 PM  
Sample Name : 030501 Location : -  
Acq. Operator : WW  
Acq. Method : C:\HPCHEM\1\METHODS\LYH.M  
Last changed : 3/22/2012 2:03:32 PM by WW  
(modified after loading)  
Analysis Method : C:\HPCHEM\1\METHODS\LYH.M  
Last changed : 3/23/2012 7:32:25 PM by WW  
(modified after loading)  
=====

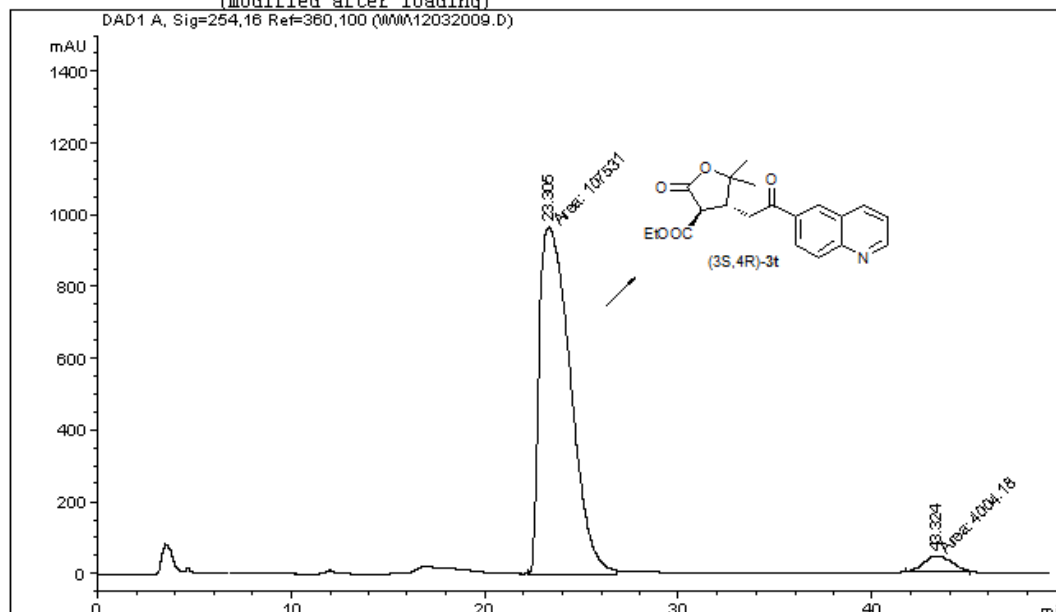

=====  
Area Percent Report  
=====

Sorted By : Signal  
Multiplier : 1.0000  
Dilution : 1.0000  
Sample Amount : 1.00000 [ng/ul] (not used in calc.)

Signal 1: DAD1 A, Sig=254,16 Ref=360,100

| Peak # | RetTime [min] | Type | Width [min] | Area [mAU*s] | Height [mAU] | Area %  |
|--------|---------------|------|-------------|--------------|--------------|---------|
| 1      | 23.305        | MM   | 1.8568      | 1.07531e5    | 965.20502    | 96.4099 |
| 2      | 43.324        | MM   | 1.5935      | 4004.18091   | 41.88075     | 3.5901  |

Totals : 1.11535e5 1007.08577

Results obtained with enhanced integrator!

=====  
\*\*\* End of Report \*\*\*  
=====

### HPLC analysis for compounds **3u**

Data File C:\HPCHEM\1\DATA\WW2\12092000.D

Sample Name: diethyl-rac

```
=====  
Injection Date : 9/20/2012 10:51:20 AM  
Sample Name    : diethyl-rac           Location : -  
Acq. Operator  : WW  
Acq. Method    : C:\HPCHEM\1\METHODS\GE.M  
Last changed   : 9/20/2012 10:35:24 AM  
                (modified after loading)  
Analysis Method : C:\HPCHEM\1\METHODS\GE.M  
Last changed   : 9/20/2012 4:46:08 PM by WW  
                (modified after loading)  
=====
```

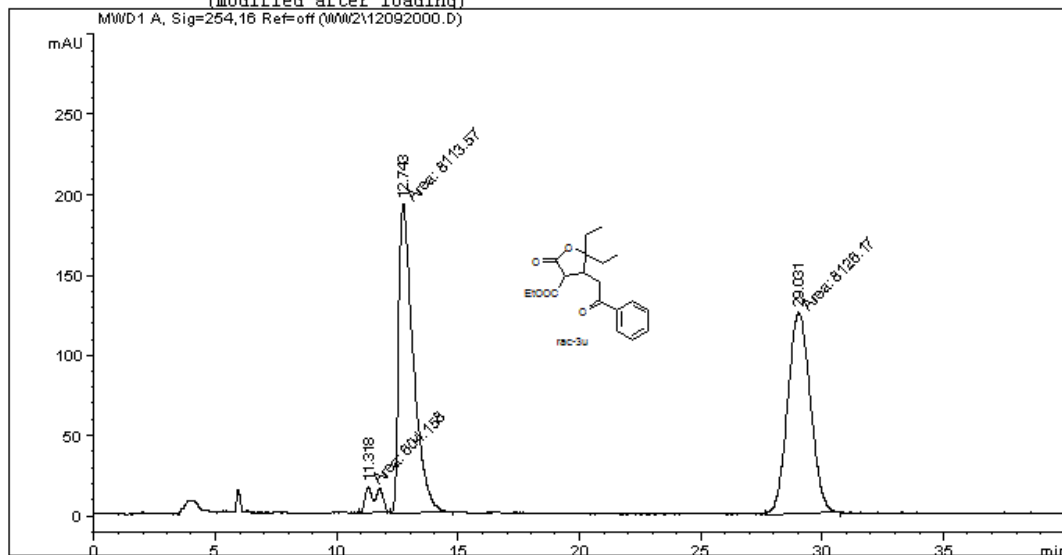

=====  
Area Percent Report  
=====

```
Sorted By      :      Signal  
Multiplier     :      1.0000  
Dilution       :      1.0000
```

Signal 1: MWD1 A, Sig=254,16 Ref=off

| Peak # | RetTime [min] | Type | Width [min] | Area [mAU*s] | Height [mAU] | Area %  |
|--------|---------------|------|-------------|--------------|--------------|---------|
| 1      | 11.318        | MM   | 0.6238      | 604.15839    | 16.14061     | 3.5868  |
| 2      | 12.743        | MM   | 0.7021      | 8113.56836   | 192.59084    | 48.1692 |
| 3      | 29.031        | MM   | 1.0830      | 8126.17090   | 125.05698    | 48.2440 |

Totals : 1.68439e4 333.78843

Results obtained with enhanced integrator!

=====  
\*\*\* End of Report \*\*\*

Data File C:\HPCHEM\1\DATA\WW2\12092001.D

Sample Name: diethyl-ee

```

=====
Injection Date : 9/20/2012 11:47:51 AM
Sample Name   : diethyl-ee
Acq. Operator : WW
Acq. Method   : C:\HPCHEM\1\METHODS\GE.M
Last changed  : 9/20/2012 10:35:24 AM
                (modified after loading)
Analysis Method : C:\HPCHEM\1\METHODS\GE.M
Last changed  : 9/20/2012 4:51:07 PM by WW
                (modified after loading)
    
```

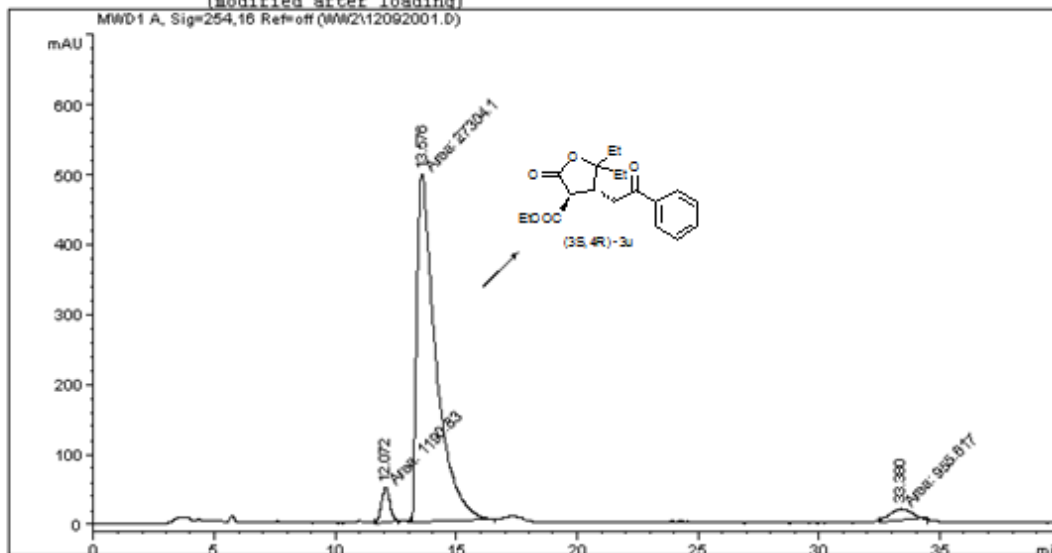

Area Percent Report

```

Sorted By      : Signal
Multiplier    : 1.0000
Dilution      : 1.0000
    
```

Signal 1: MWD1 A, Sig=254,16 Ref=off

| Peak # | RetTime [min] | Type | Width [min] | Area [mAU*s] | Height [mAU] | Area %  |
|--------|---------------|------|-------------|--------------|--------------|---------|
| 1      | 12.072        | HM   | 0.3974      | 1190.82971   | 49.94604     | 4.0435  |
| 2      | 13.576        | HM   | 0.9145      | 2.73041e4    | 497.59079    | 92.7117 |
| 3      | 33.380        | HM   | 1.0049      | 955.61743    | 15.84859     | 3.2448  |

Totals : 2.94505e4 563.38542

Results obtained with enhanced integrator!

\*\*\* End of Report \*\*\*

## HPLC analysis for compounds 3v

Data File C:\HPCHEM\1\DATA\WW2\12092002.D

Sample Name: hexane-rac

```
=====  
Injection Date : 9/20/2012 12:34:51 PM  
Sample Name   : hexane-rac                Location : -  
Acq. Operator : WW  
Acq. Method   : C:\HPCHEM\1\METHODS\GE.M  
Last changed  : 9/20/2012 10:35:24 AM  
                (modified after loading)  
Analysis Method : C:\HPCHEM\1\METHODS\GE.M  
Last changed  : 9/20/2012 4:54:36 PM by WW  
                (modified after loading)  
=====
```

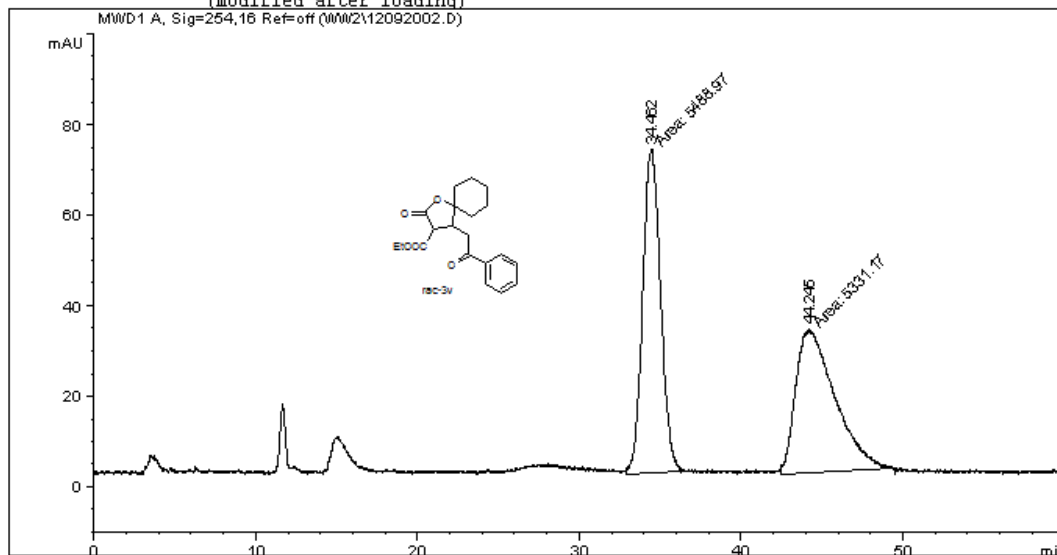

### Area Percent Report

```
=====  
Sorted By      :      Signal  
Multiplier     :      1.0000  
Dilution       :      1.0000  
=====
```

Signal 1: MWD1 A, Sig=254,16 Ref=off

| Peak # | RetTime [min] | Type | Width [min] | Area [mAU*s] | Height [mAU] | Area %  |
|--------|---------------|------|-------------|--------------|--------------|---------|
| 1      | 34.462        | MM   | 1.2811      | 5488.96875   | 71.41008     | 50.7292 |
| 2      | 44.245        | MM   | 2.8088      | 5331.17480   | 31.63369     | 49.2708 |

Totals : 1.08201e4 103.04377

Results obtained with enhanced integrator!

=====  
\*\*\* End of Report \*\*\*

Data File C:\HPCHEM\1\DATA\WU2\12092003.D

Sample Name: hexane-ee

=====  
Injection Date : 9/20/2012 1:43:59 PM  
Sample Name : hexane-ee Location : -  
Acq. Operator : WU  
Acq. Method : C:\HPCHEM\1\METHODS\GE.M  
Last changed : 9/20/2012 10:35:24 AM  
(modified after loading)  
Analysis Method : C:\HPCHEM\1\METHODS\GE.M  
Last changed : 9/20/2012 4:56:02 PM by WU  
(modified after loading)  
=====

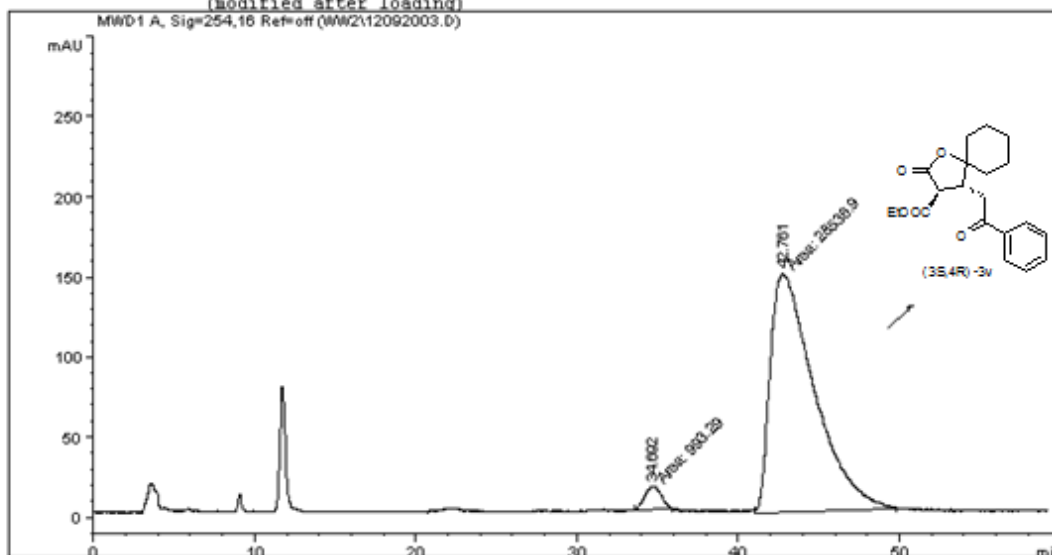

=====  
Area Percent Report  
=====

Sorted By : Signal  
Multiplier : 1.0000  
Dilution : 1.0000

Signal 1: MWD1 A, Sig=254,16 Ref=off

| Peak # | RetTime [min] | Type | Width [min] | Area [mAU*s] | Height [mAU] | Area %  |
|--------|---------------|------|-------------|--------------|--------------|---------|
| 1      | 34.692        | HM   | 1.1576      | 993.29034    | 14.30066     | 3.3636  |
| 2      | 42.761        | HM   | 3.1849      | 2.85369e4    | 149.33273    | 96.6364 |

Totals : 2.95302e4 163.63340

Results obtained with enhanced integrator!

=====  
\*\*\* End of Report \*\*\*

## Crystal information of **3d**

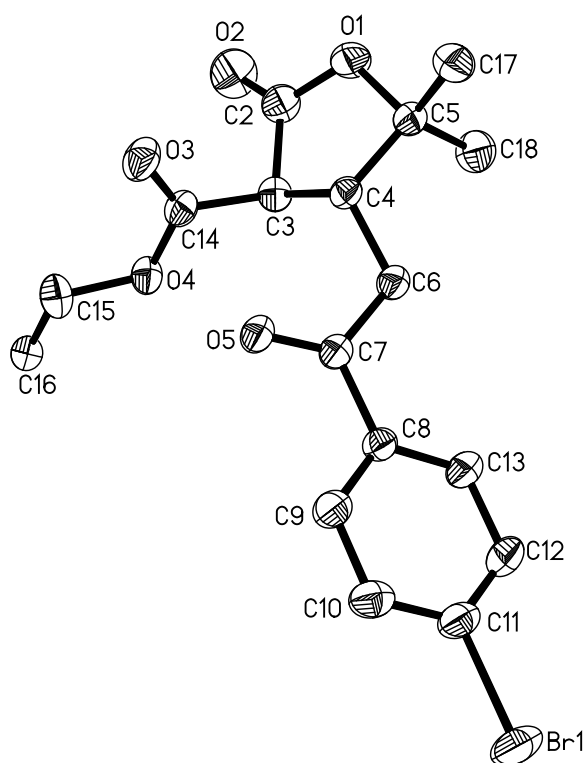

**Table 1.** Crystal data and structure refinement for **3d**.

|                      |                                                   |         |
|----------------------|---------------------------------------------------|---------|
| Identification code  | 3d                                                |         |
| Empirical formula    | C <sub>17</sub> H <sub>19</sub> O <sub>5</sub> Br |         |
| Formula weight       | 383.24                                            |         |
| Temperature          | 295(2) K                                          |         |
| Wavelength           | 1.54184 Å                                         |         |
| Crystal system       | Orthorhombic                                      |         |
| Space group          | P2(1)2(1)2(1)                                     |         |
| Unit cell dimensions | a = 6.941(3) Å                                    | ∠ = 90° |
|                      | b = 11.055(4) Å                                   | ∠ = 90° |
|                      | c = 22.261(8) Å                                   | ∠ = 90° |
| Volume               | 1708.1(11) Å <sup>3</sup>                         |         |
| Z                    | 4                                                 |         |
| Density (calculated) | 1.490 Mg/m <sup>3</sup>                           |         |



|                                   |                                             |
|-----------------------------------|---------------------------------------------|
| Absorption coefficient            | 3.480 mm <sup>-1</sup>                      |
| F(000)                            | 784                                         |
| Crystal size                      | 0.10 x 0.13 x 0.31 mm <sup>3</sup>          |
| Theta range for data collection   | 3.97 to 72.64°.                             |
| Index ranges                      | -8<=h<=8, -13<=k<=12, -27<=l<=27            |
| Reflections collected             | 3012                                        |
| Independent reflections           | 3330( <i>R</i> <sub>int</sub> = 0.0619)     |
| Completeness to theta = 27.48°    | 98.8 %                                      |
| Absorption correction             | Multi-scan                                  |
| Refinement method                 | Full-matrix least-squares on F <sup>2</sup> |
| Goodness-of-fit on F <sup>2</sup> | 1.059                                       |
| R indices (all data)              | R1 = 0.0347, wR2 = 0.0894                   |
| Refine number parameter           | 209                                         |
| Absolute structure flack          | -0.008(19)                                  |
| Extinction coefficient            | 0.0102(5)                                   |

**Table 2.** Atomic coordinates ( $\times 10^4$ ) and equivalent isotropic displacement parameters ( $\text{\AA}^2 \times 10^3$ ) for 3d.  $U(\text{eq})$  is defined as one third of the trace of the orthogonalized  $U^{ij}$  tensor.

|        | x         | y        | z        | U(eq) |
|--------|-----------|----------|----------|-------|
| Br(1)  | -7750(1)  | -146(1)  | 524(1)   | 83(1) |
| O(1)   | -8462(3)  | -7108(2) | -2832(1) | 62(1) |
| O(2)   | -5895(5)  | -8296(3) | -2766(1) | 95(1) |
| O(3)   | -7025(3)  | -8440(2) | -1352(1) | 67(1) |
| O(4)   | -4235(3)  | -7425(2) | -1271(1) | 51(1) |
| O(5)   | -7621(3)  | -5807(2) | -699(1)  | 57(1) |
| C(2)   | -6843(4)  | -7486(3) | -2568(1) | 59(1) |
| C(3)   | -6446(4)  | -6751(3) | -2000(1) | 46(1) |
| C(4)   | -8314(4)  | -6036(2) | -1915(1) | 41(1) |
| C(5)   | -9173(4)  | -5979(3) | -2553(1) | 49(1) |
| C(6)   | -8113(4)  | -4795(2) | -1626(1) | 46(1) |
| C(7)   | -7783(3)  | -4854(2) | -953(1)  | 43(1) |
| C(8)   | -7712(4)  | -3680(2) | -613(1)  | 44(1) |
| C(9)   | -7708(4)  | -3718(2) | 10(1)    | 55(1) |
| C(10)  | -7691(4)  | -2670(3) | 345(1)   | 60(1) |
| C(11)  | -7701(4)  | -1585(2) | 58(1)    | 59(1) |
| C(12)  | -7682(5)  | -1494(2) | -559(1)  | 69(1) |
| C(13)  | -7696(5)  | -2564(2) | -891(1)  | 61(1) |
| C(14)  | -5965(4)  | -7631(2) | -1500(1) | 48(1) |
| C(15)  | -3648(4)  | -8211(3) | -781(1)  | 60(1) |
| C(16)  | -1535(5)  | -8062(3) | -686(1)  | 58(1) |
| C(17)  | -11325(5) | -6037(3) | -2545(2) | 70(1) |
| C(18)  | -8416(6)  | -4947(3) | -2936(1) | 75(1) |
| H(3A)  | -5365     | -6197    | -2067    | 55    |
| H(4A)  | -9182     | -6521    | -1664    | 49    |
| H(6A)  | -7042     | -4372    | -1811    | 56    |
| H(6B)  | -9272     | -4331    | -1704    | 56    |
| H(9A)  | -7717     | -4462    | 204      | 65    |
| H(10A) | -7672     | -2705    | 762      | 72    |
| H(12A) | -7660     | -744     | -747     | 82    |
| H(13A) | -7695     | -2524    | -1309    | 74    |
| H(15A) | -3939     | -9046    | -879     | 73    |
| H(15B) | -4340     | -7998    | -418     | 73    |
| H(16A) | -1123     | -8578    | -364     | 87    |
| H(16B) | -1261     | -7235    | -586     | 87    |
| H(16C) | -861      | -8277    | -1047    | 87    |
| H(17A) | -11804    | -6002    | -2950    | 105   |

|        |        |       |       |     |
|--------|--------|-------|-------|-----|
| H(17B) | -11824 | -5365 | -2320 | 105 |
| H(17C) | -11729 | -6779 | -2361 | 105 |
| H(18A) | -9010  | -4976 | -3326 | 113 |
| H(18B) | -7045  | -5022 | -2979 | 113 |
| H(18C) | -8715  | -4190 | -2747 | 113 |

---

—

**Table 3.** Bond lengths [Å] and angles [°] for **3d**.

---

|                |            |
|----------------|------------|
| Br (1)–C (11)  | 1. 899 (2) |
| O (1)–C (2)    | 1. 335 (4) |
| O (1)–C (5)    | 1. 478 (3) |
| O (2)–C (2)    | 1. 196 (4) |
| O (3)–C (14)   | 1. 205 (3) |
| O (4)–C (14)   | 1. 324 (3) |
| O (4)–C (15)   | 1. 453 (3) |
| O (5)–C (7)    | 1. 202 (3) |
| C (2)–C (3)    | 1. 528 (4) |
| C (3)–C (14)   | 1. 515 (4) |
| C (3)–C (4)    | 1. 531 (3) |
| C (3)–H (3A)   | 0. 9800    |
| C (4)–C (6)    | 1. 522 (3) |
| C (4)–C (5)    | 1. 543 (3) |
| C (4)–H (4A)   | 0. 9800    |
| C (5)–C (17)   | 1. 496 (5) |
| C (5)–C (18)   | 1. 518 (4) |
| C (6)–C (7)    | 1. 516 (3) |
| C (6)–H (6A)   | 0. 9700    |
| C (6)–H (6B)   | 0. 9700    |
| C (7)–C (8)    | 1. 503 (3) |
| C (8)–C (13)   | 1. 380 (4) |
| C (8)–C (9)    | 1. 388 (3) |
| C (9)–C (10)   | 1. 378 (4) |
| C (9)–H (9A)   | 0. 9300    |
| C (10)–C (11)  | 1. 358 (4) |
| C (10)–H (10A) | 0. 9300    |
| C (11)–C (12)  | 1. 377 (4) |
| C (12)–C (13)  | 1. 395 (4) |
| C (12)–H (12A) | 0. 9300    |
| C (13)–H (13A) | 0. 9300    |
| C (15)–C (16)  | 1. 491 (5) |
| C (15)–H (15A) | 0. 9700    |
| C (15)–H (15B) | 0. 9700    |
| C (16)–H (16A) | 0. 9600    |
| C (16)–H (16B) | 0. 9600    |
| C (16)–H (16C) | 0. 9600    |
| C (17)–H (17A) | 0. 9600    |
| C (17)–H (17B) | 0. 9600    |
| C (17)–H (17C) | 0. 9600    |
| C (18)–H (18A) | 0. 9600    |

|                     |           |
|---------------------|-----------|
| C (18)–H(18B)       | 0.9600    |
| C (18)–H(18C)       | 0.9600    |
| C (2)–O(1)–C (5)    | 111.1 (2) |
| C (14)–O(4)–C (15)  | 116.1 (2) |
| O(2)–C(2)–O(1)      | 122.3 (3) |
| O(2)–C(2)–C(3)      | 127.2 (3) |
| O(1)–C(2)–C(3)      | 110.5 (2) |
| C (14)–C(3)–C(2)    | 107.9 (2) |
| C (14)–C(3)–C(4)    | 115.3 (2) |
| C (2)–C(3)–C(4)     | 103.0 (2) |
| C (14)–C(3)–H(3A)   | 110.2     |
| C (2)–C(3)–H(3A)    | 110.2     |
| C (4)–C(3)–H(3A)    | 110.2     |
| C (6)–C(4)–C(3)     | 116.1 (2) |
| C (3)–C(4)–C(5)     | 103.5 (2) |
| C (6)–C(4)–H(4A)    | 108.0     |
| C (3)–C(4)–H(4A)    | 108.0     |
| C (5)–C(4)–H(4A)    | 108.0     |
| O(1)–C(5)–C(17)     | 107.6 (2) |
| O(1)–C(5)–C(18)     | 106.5 (2) |
| C (17)–C(5)–C(18)   | 112.6 (3) |
| O(1)–C(5)–C(4)      | 102.9 (2) |
| C (17)–C(5)–C(4)    | 111.9 (2) |
| C (18)–C(5)–C(4)    | 114.5 (2) |
| C (7)–C(6)–C(4)     | 113.1 (2) |
| C (7)–C(6)–H(6A)    | 109.0     |
| C (4)–C(6)–H(6A)    | 109.0     |
| C (7)–C(6)–H(6B)    | 109.0     |
| C (4)–C(6)–H(6B)    | 109.0     |
| H(6A)–C(6)–H(6B)    | 107.8     |
| O(5)–C(7)–C(8)      | 121.1 (2) |
| O(5)–C(7)–C(6)      | 121.2 (2) |
| C (8)–C(7)–C(6)     | 117.7 (2) |
| C (13)–C(8)–C(9)    | 118.3 (2) |
| C (13)–C(8)–C(7)    | 123.1 (2) |
| C (9)–C(8)–C(7)     | 118.5 (2) |
| C (10)–C(9)–C(8)    | 121.1 (2) |
| C (10)–C(9)–H(9A)   | 119.5     |
| C (8)–C(9)–H(9A)    | 119.5     |
| C (11)–C(10)–C(9)   | 119.2 (2) |
| C (11)–C(10)–H(10A) | 120.4     |
| C (9)–C(10)–H(10A)  | 120.4     |
| C (10)–C(11)–C(12)  | 122.2 (2) |
| C (10)–C(11)–Br(1)  | 118.9 (2) |

|                     |          |
|---------------------|----------|
| C(12)-C(11)-Br(1)   | 118.9(2) |
| C(11)-C(12)-C(13)   | 117.9(3) |
| C(11)-C(12)-H(12A)  | 121.0    |
| C(13)-C(12)-H(12A)  | 121.0    |
| C(8)-C(13)-C(12)    | 121.3(3) |
| C(8)-C(13)-H(13A)   | 119.3    |
| C(12)-C(13)-H(13A)  | 119.3    |
| O(3)-C(14)-O(4)     | 125.2(2) |
| O(3)-C(14)-C(3)     | 122.9(2) |
| O(4)-C(14)-C(3)     | 111.9(2) |
| O(4)-C(15)-C(16)    | 108.5(3) |
| O(4)-C(15)-H(15A)   | 110.0    |
| C(16)-C(15)-H(15A)  | 110.0    |
| O(4)-C(15)-H(15B)   | 110.0    |
| C(16)-C(15)-H(15B)  | 110.0    |
| H(15A)-C(15)-H(15B) | 108.4    |
| C(15)-C(16)-H(16A)  | 109.5    |
| C(15)-C(16)-H(16B)  | 109.5    |
| H(16A)-C(16)-H(16B) | 109.5    |
| C(15)-C(16)-H(16C)  | 109.5    |
| H(16A)-C(16)-H(16C) | 109.5    |
| H(16B)-C(16)-H(16C) | 109.5    |
| C(5)-C(17)-H(17A)   | 109.5    |
| C(5)-C(17)-H(17B)   | 109.5    |
| H(17A)-C(17)-H(17B) | 109.5    |
| C(5)-C(17)-H(17C)   | 109.5    |
| H(17A)-C(17)-H(17C) | 109.5    |
| H(17B)-C(17)-H(17C) | 109.5    |
| C(5)-C(18)-H(18A)   | 109.5    |
| C(5)-C(18)-H(18B)   | 109.5    |
| H(18A)-C(18)-H(18B) | 109.5    |
| C(5)-C(18)-H(18C)   | 109.5    |
| H(18A)-C(18)-H(18C) | 109.5    |
| H(18B)-C(18)-H(18C) | 109.5    |

---

## ESI-MS of intermediate enamine salt

Acq. File: MT20120612114854.wiff

Printing Date: Tuesday, June 12, 2012

Workstation: QSTAR

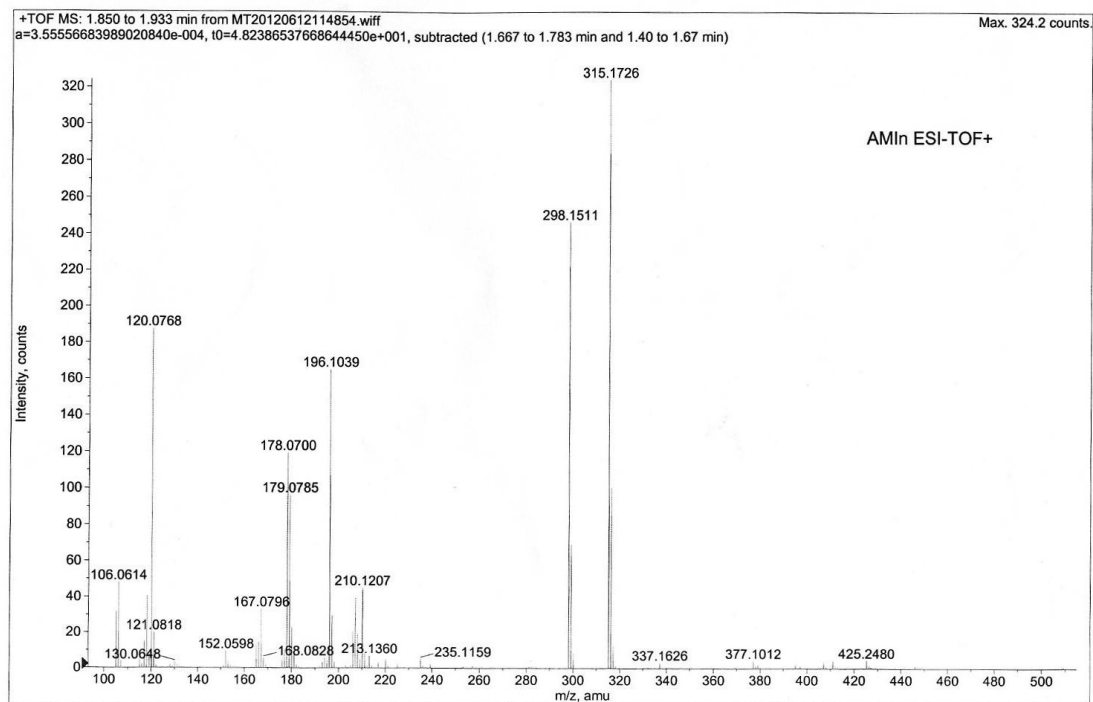

Acq. File: MT20120612112909.wiff

Printing Date: Tuesday, June 12, 2012

Workstation: QSTAR

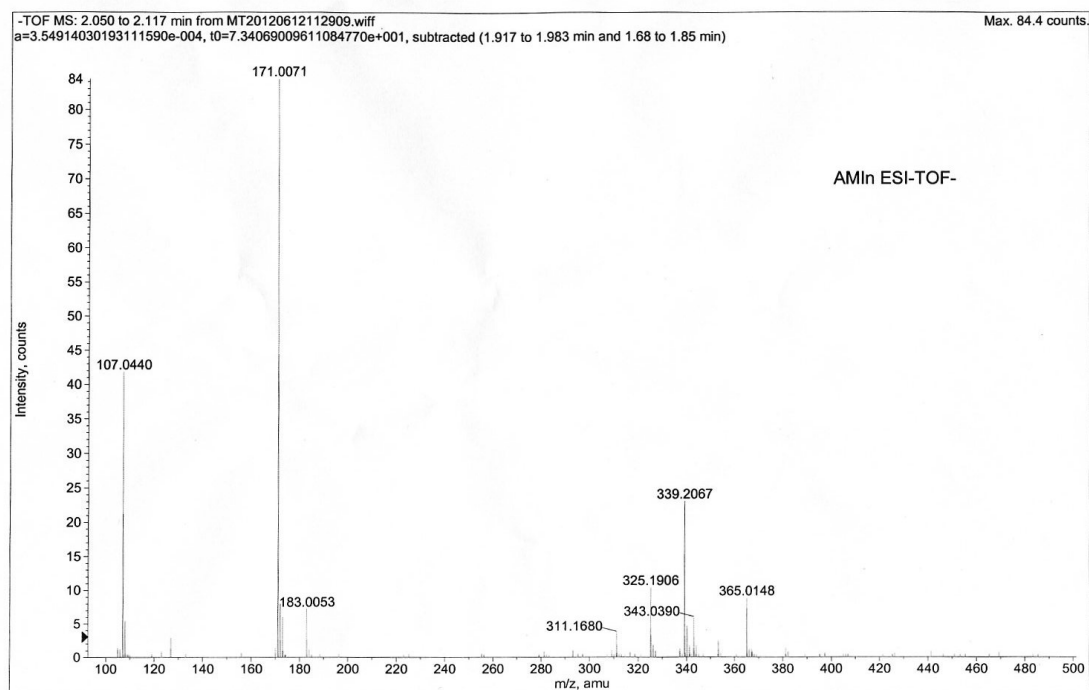

Supplement: c2cc35488h.pdf [file c2cc35488h.pdf]
